# Supplementary material
Source: publisher site journal article supplement (https://www.dovepress.com/article/561645)
Supplement: Supplementary file 1 [file 561645%20Supplementary%20Material.pdf]

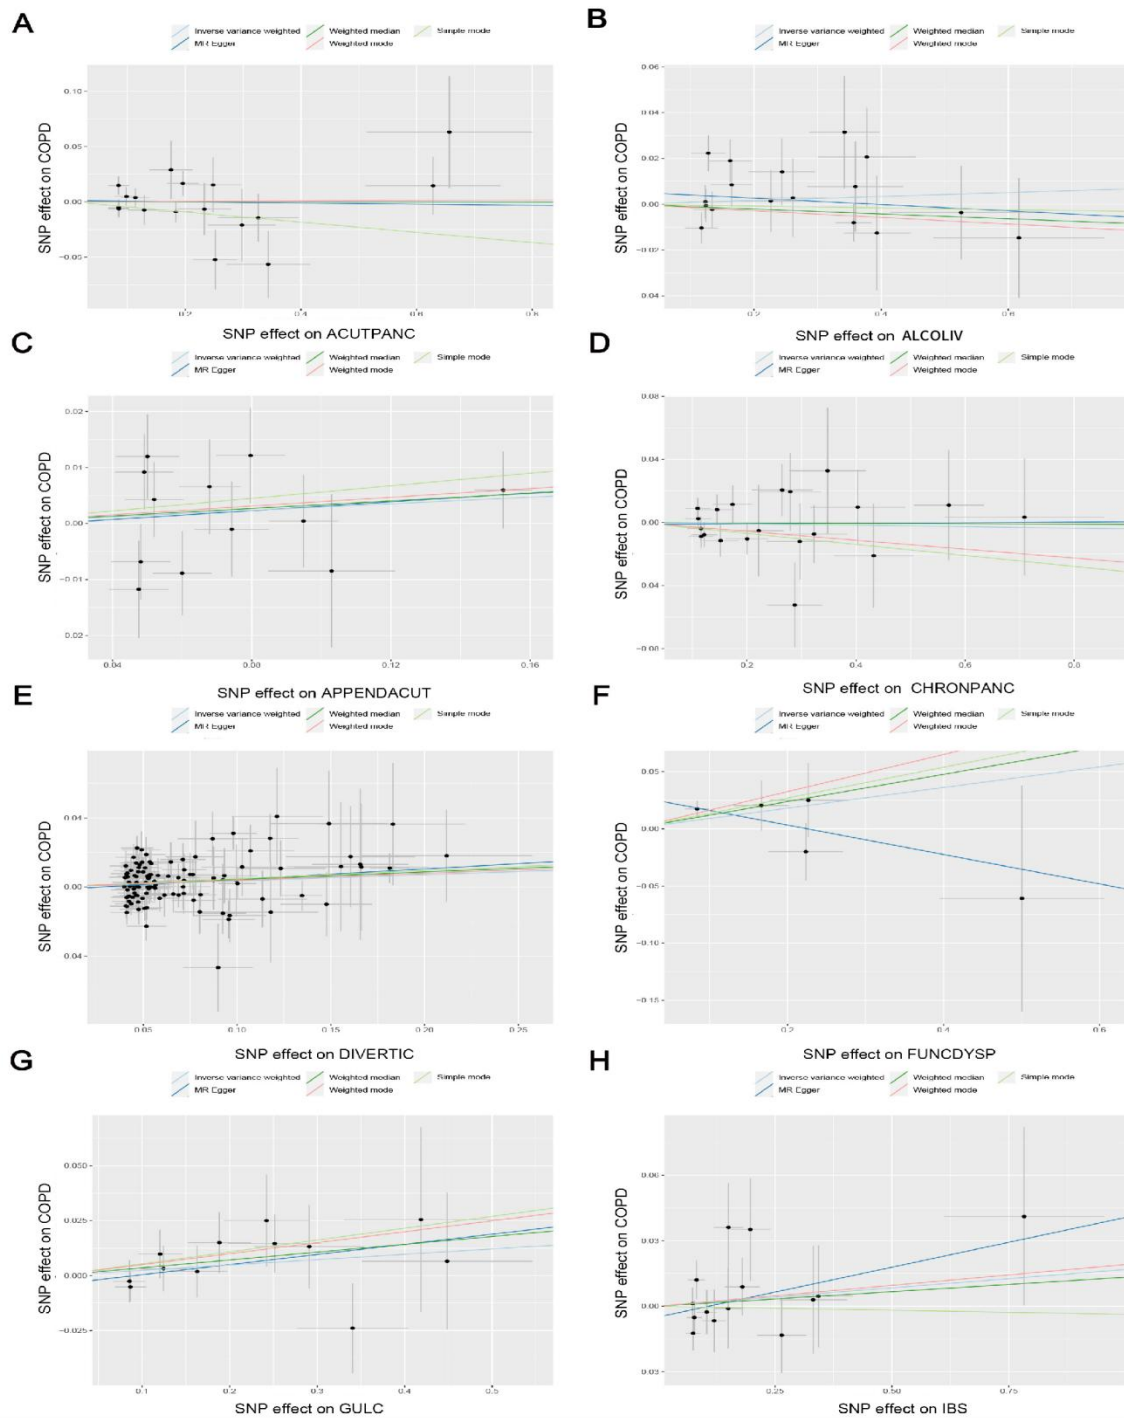

**Figure S1** Scatter plots and funnel plots of Mendelian randomization (MR) analyses for Acute pancreatitis (A), Alcoholic liver disease (B), Acute appendicitis (C), Chronic pancreatitis (D), Diverticular disease (E), Functional gastrointestinal disorders (F), Gastric ulcer (G), and Irritable bowel syndrome (H) on COPD. The 95%CI of odds ratio for each IV is shown by vertical and horizontal lines. The slope of the lines represents the estimated causal effect of the MR methods.

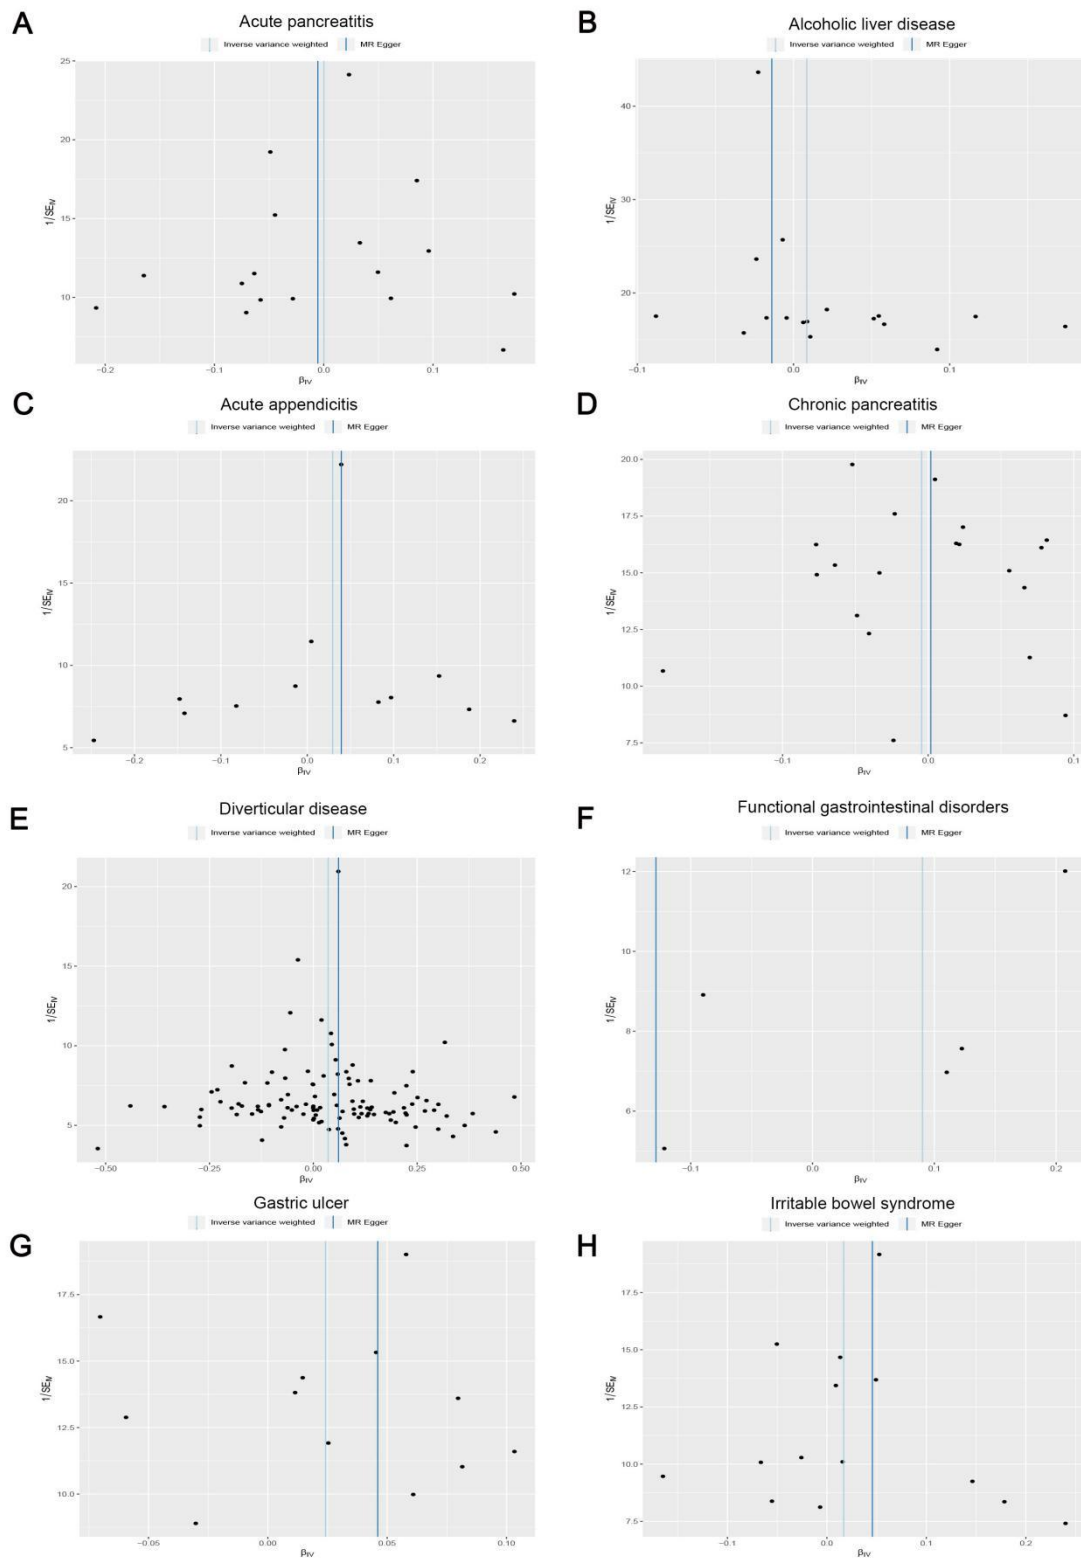

**Figure S2** Funnel plot of Mendelian randomization results. Funnel plots for overall heterogeneity of MR estimates for the effect of Acute pancreatitis (A), Alcoholic liver disease (B), Acute appendicitis (C), Chronic pancreatitis (D), Diverticular disease (E), Functional gastrointestinal disorders (F), Gastric ulcer (G), and Irritable bowel syndrome (H) on COPD. IVW, inverse-variance weighted.

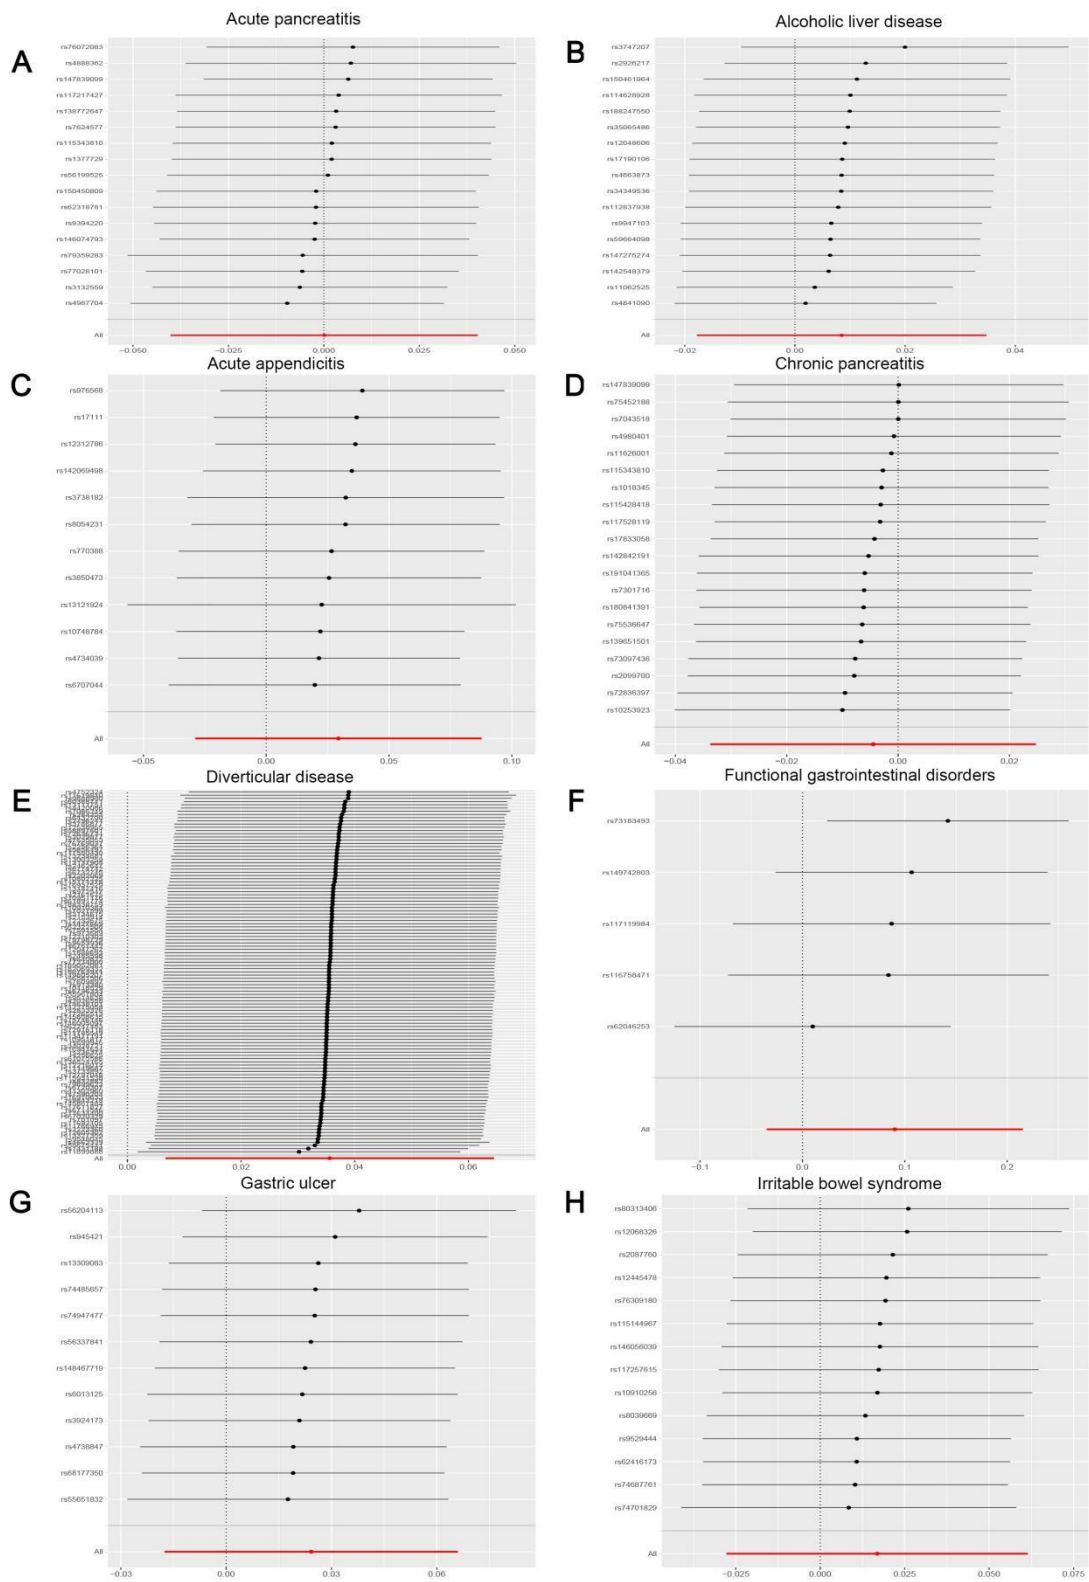

**Figure S3** Leave-one-out plots of Mendelian randomization sensitivity analysis of Acute pancreatitis (A), Alcoholic liver disease (B), Acute appendicitis (C), Chronic pancreatitis (D), Diverticular disease (E), Functional gastrointestinal disorders (F), Gastric ulcer (G), and Irritable bowel syndrome (H) on COPD.

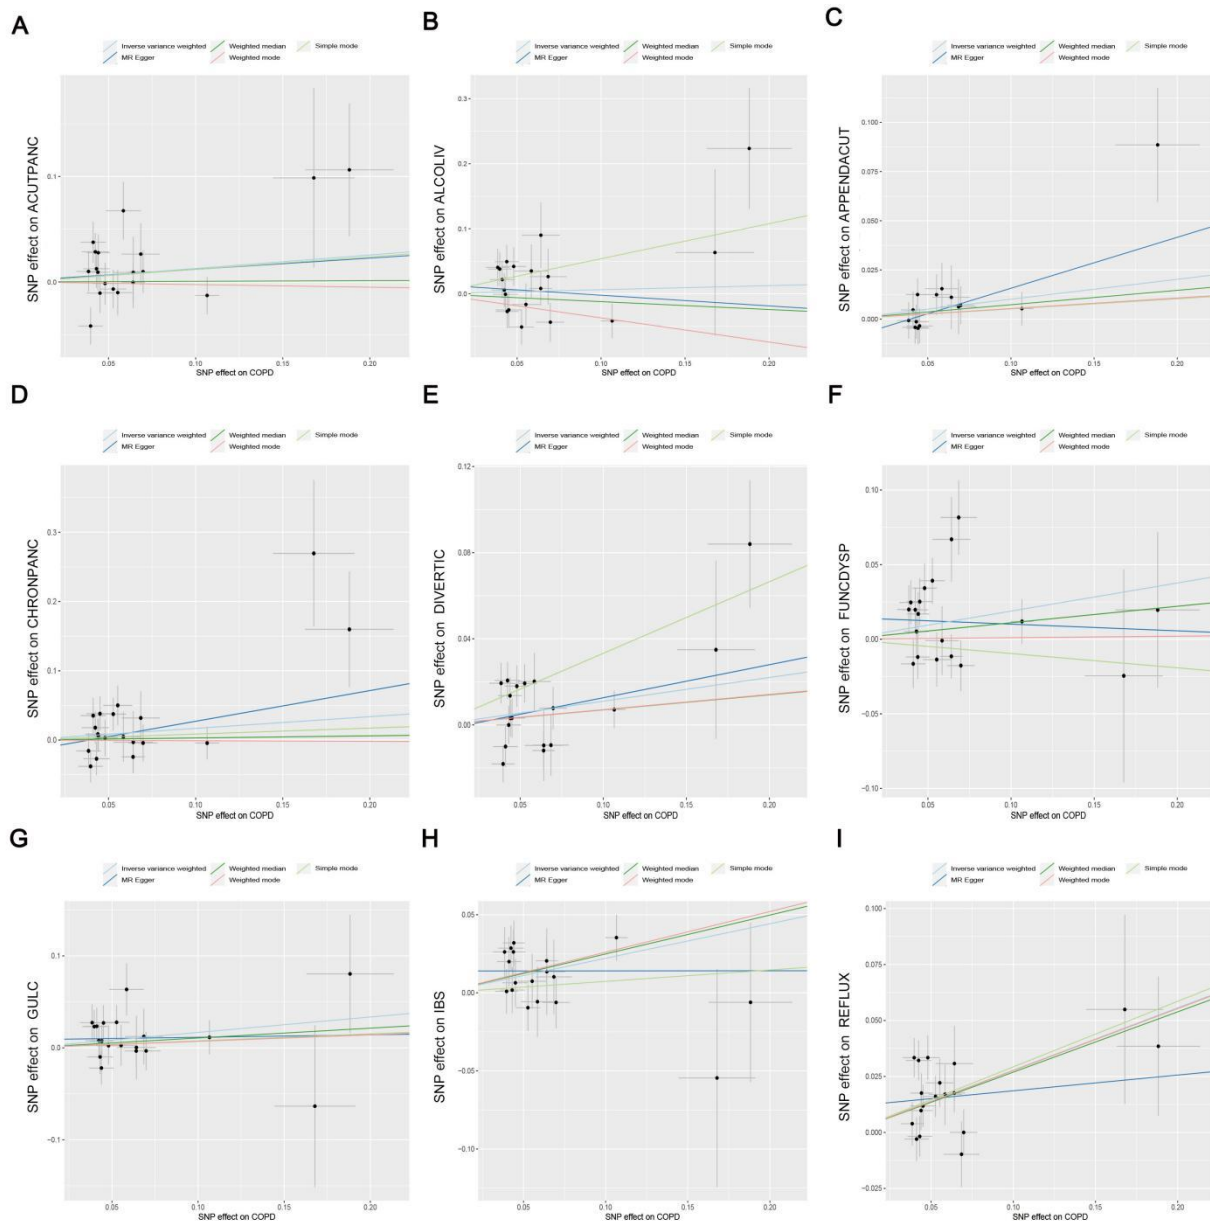

**Figure S4** Scatter plots and funnel plots of Mendelian randomization (MR) analyses for COPD on Acute pancreatitis (A), Alcoholic liver disease (B), Acute appendicitis (C), Chronic pancreatitis (D), Diverticular disease (E), Functional gastrointestinal disorders (F), Gastric ulcer (G), Irritable bowel syndrome (H), and Gastroesophageal reflux disease(I). The 95%CI of odd ratio for each IV is shown by vertical and horizontal lines. The slope of the lines represents the estimated causal effect of the MR methods.

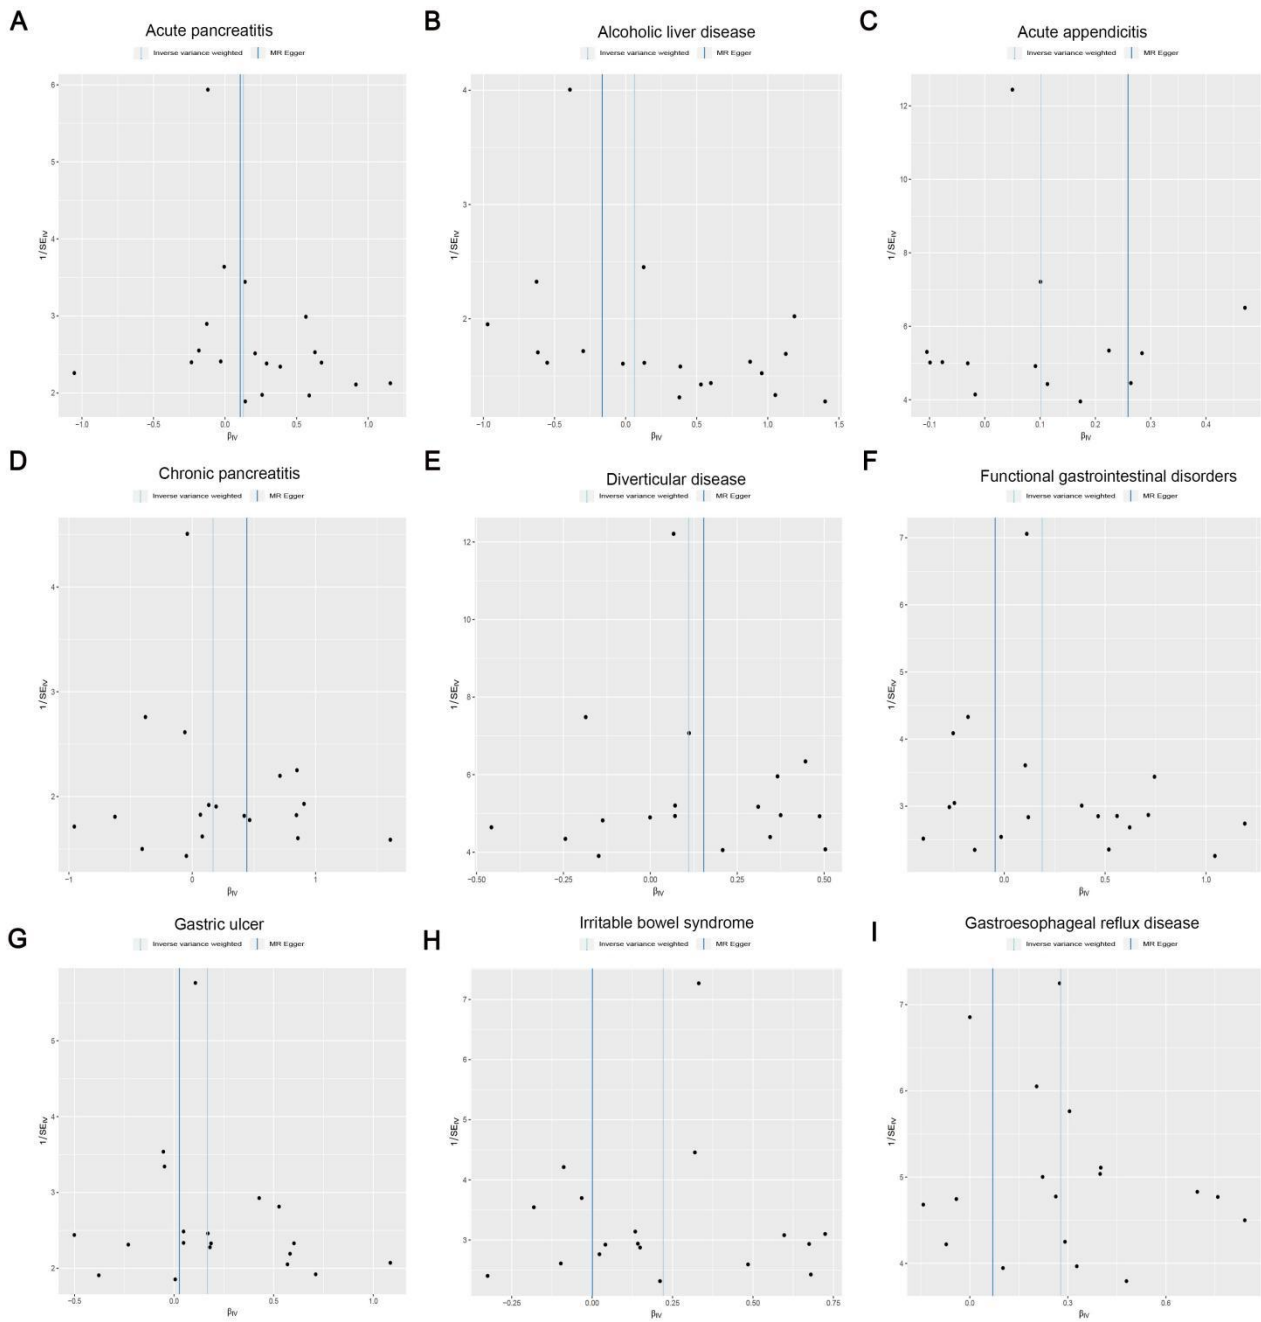

**Figure S5** Funnel plot of Mendelian randomization results. Funnel plots for overall heterogeneity of MR estimates for the effect of COPD on Acute pancreatitis (A), Alcoholic liver disease (B), Acute appendicitis (C), Chronic pancreatitis (D), Diverticular disease (E), Functional gastrointestinal disorders (F), Gastric ulcer (G), Irritable bowel syndrome (H), and Gastroesophageal reflux disease(I). IVW, inverse-variance weighted.

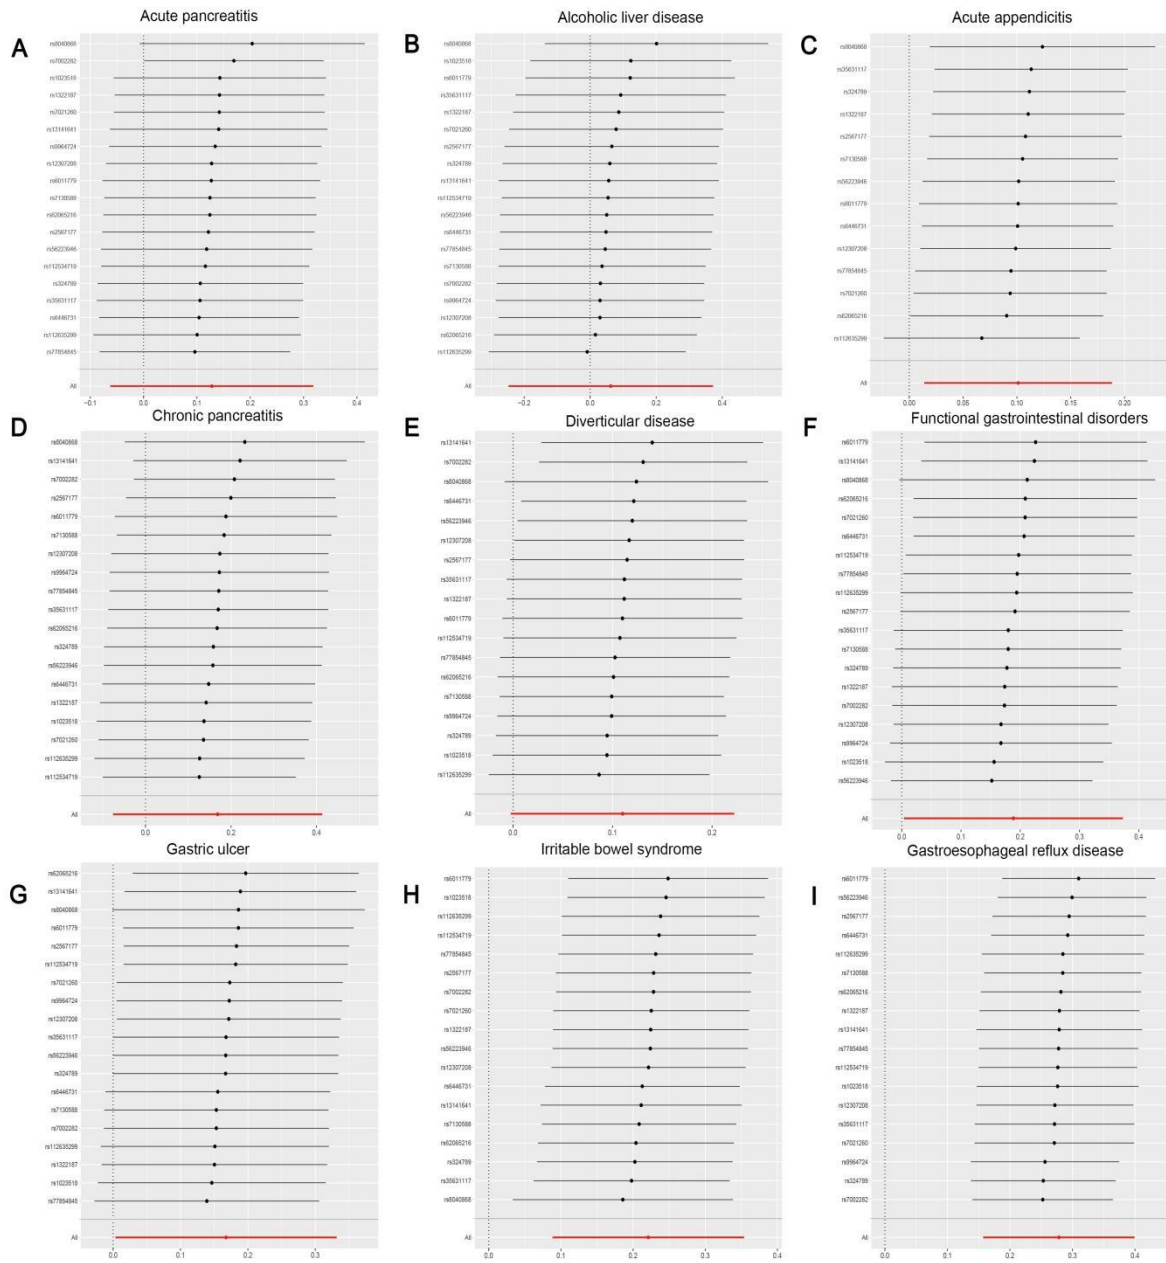

**Figure S6** Leave-one-out plots of Mendelian randomization sensitivity analysis of COPD on Acute pancreatitis (A), Alcoholic liver disease (B), Acute appendicitis (C), Chronic pancreatitis (D), Diverticular disease (E), Functional gastrointestinal disorders (F), Gastric ulcer (G), Irritable bowel syndrome (H), and Gastroesophageal reflux disease(I).

Supplementary Table S1. GWAS data sources

Supplementary Table S2. 21 independent associations identified with GCTA-COJO (conditional and joint) analysis applied to GWAS summary statistics (MTAG-COPD)

Supplementary Table S3. Pleiotropic genomic loci in COPD and GERD, appendicitis, IBS, diverticular disease, acute gastritis, acute pancreatitis, chronic pancreatitis, functional gastrointestinal disorder, and alcoholic liver disease ) identified by FUMA using LPACO results

Supplementary Table S4. The annotation in FUMA is based on the result of MAGMA

Supplementary Table S5. MAGMA combined with POPS screening (POPS score>1)

Supplementary Table S6. Gene ontology enrichment

Supplementary Table S7. KEGG pathway enrichment

Supplementary Table S8. Mammalian Phenotype ontology based on pleiotropic genes

Supplementary Table S9. Bliss analysis from pQTL (ARIC, Decode, and UKB-PP) to MTAG-COPD (FDR < 0.05 and  $p_{HEIDI} > 0.01$ )

Supplementary Table S10: Drug-Gene Interaction Network of Pleiotropic Genes in COPD-GI Comorbidity

**Supplementary Table S1. GWAS data sources**

| <b>Disease</b>                        | <b>Data source</b>             | <b>Case</b> | <b>Control</b> | <b>Ancestry</b> |
|---------------------------------------|--------------------------------|-------------|----------------|-----------------|
| Chronic obstructive pulmonary disease | <a href="#">PMID: 36777996</a> | 58,559      | 937,358        | European        |
| Gastric ulcer                         | FinnGen                        | 6,459       | 350,064        | European        |
| Chronic gastritis                     | FinnGen                        | 10,317      | 350,064        | European        |
| Acute gastritis                       | FinnGen                        | 2,558       | 350,064        | European        |
| Acute pancreatitis                    | FinnGen                        | 6,787       | 361,641        | European        |
| Chronic pancreatitis                  | FinnGen                        | 3,875       | 361,641        | European        |
| Irritable bowel syndrome              | FinnGen                        | 10,329      | 329,381        | European        |
| Gastroesophageal reflux disease       | FinnGen                        | 28,859      | 350,064        | European        |
| Alcoholic liver disease               | FinnGen                        | 3,047       | 400,247        | European        |
| Non-alcoholic fatty liver disease     | FinnGen                        | 2,568       | 409,613        | European        |
| Duodenal ulcer                        | FinnGen                        | 3,795       | 350,064        | European        |
| Functional gastrointestinal disorders | FinnGen                        | 9,680       | 350,064        | European        |
| Acute appendicitis                    | FinnGen                        | 31,628      | 378,082        | European        |
| Diverticular disease                  | FinnGen                        | 33,619      | 329,381        | European        |
| Inflammatory bowel disease            | FinnGen                        | 9,083       | 392,974        | European        |
| Celiac disease                        | FinnGen                        | 4,115       | 394,391        | European        |

**Supplementary Table S2. 21 independent associations identified with GCTA-COJO (conditional and joint) analysis applied to GWAS summary statistics (MTAG-COPD)**

| Chr | SNP         | bp        | refA | freq    | b           | se         | p        | n      | freq_gen0 | bJ          | bJ_se      | pJ       | LD_r       |
|-----|-------------|-----------|------|---------|-------------|------------|----------|--------|-----------|-------------|------------|----------|------------|
| 4   | rs6446731   | 3284751   | A    | 0.2942  | 0.00878356  | 0.0015653  | 2.01E-08 | 995887 | 0.282306  | 0.00878356  | 0.00156533 | 2.01E-08 | 0          |
| 4   | rs35631117  | 67804304  | T    | 0.5407  | -0.00932569 | 0.00143131 | 7.25E-11 | 995876 | 0.533797  | -0.00932569 | 0.00143134 | 7.25E-11 | 0          |
| 4   | rs77854845  | 112371633 | C    | 0.1316  | -0.0120195  | 0.00210995 | 1.22E-08 | 995886 | 0.127237  | -0.0120195  | 0.00210999 | 1.22E-08 | 0          |
| 4   | rs13141641  | 145506456 | C    | 0.4527  | -0.0134957  | 0.00143299 | 4.60E-21 | 995830 | 0.425447  | -0.0134957  | 0.00143305 | 4.62E-21 | 0          |
| 5   | rs1023518   | 131793772 | T    | 0.284   | 0.0109741   | 0.00158178 | 3.98E-12 | 995871 | 0.274354  | 0.0109741   | 0.00158181 | 3.99E-12 | 0          |
| 6   | rs9273404   | 32627160  | G    | 0.4695  | 0.0105979   | 0.0017091  | 5.61E-10 | 696415 | 0.460239  | 0.038679    | 0.00303501 | 3.35E-37 | -0.838182  |
| 6   | rs9274503   | 32634103  | T    | 0.3792  | 0.00204739  | 0.00173324 | 0.237504 | 716484 | 0.478131  | 0.0344609   | 0.0030778  | 4.24E-29 | 0          |
| 6   | rs1322187   | 165365464 | T    | 0.3253  | 0.00919265  | 0.00162925 | 1.68E-08 | 869681 | 0.290258  | 0.00919265  | 0.00162928 | 1.68E-08 | 0          |
| 7   | rs112534719 | 117096293 | C    | 0.02358 | 0.0343174   | 0.00484995 | 1.49E-12 | 935549 | 0.0208748 | 0.0343174   | 0.00485008 | 1.49E-12 | 0          |
| 8   | rs7002282   | 10666993  | G    | 0.5831  | -0.00810406 | 0.00144668 | 2.12E-08 | 995887 | 0.60338   | -0.00810406 | 0.0014467  | 2.12E-08 | 0          |
| 8   | rs71519637  | 27334098  | T    | 0.09957 | 0.0140994   | 0.00238216 | 3.24E-09 | 995884 | 0.0914513 | 0.0131227   | 0.0023881  | 3.91E-08 | -0.0724478 |
| 8   | rs113623975 | 27412605  | G    | 0.1188  | -0.0141604  | 0.00227448 | 4.79E-10 | 935560 | 0.11829   | -0.0132805  | 0.00228016 | 5.73E-09 | 0          |
| 9   | rs7021260   | 128671151 | T    | 0.7144  | 0.0109878   | 0.00169133 | 8.22E-11 | 868094 | 0.675944  | 0.0115091   | 0.00169365 | 1.08E-11 | -0.0555297 |
| 9   | rs3025343   | 136478355 | A    | 0.09592 | 0.0135448   | 0.00242216 | 2.24E-08 | 995888 | 0.0914513 | 0.0143993   | 0.00242546 | 2.91E-09 | 0          |
| 12  | rs12307208  | 68117741  | C    | 0.09872 | -0.013306   | 0.00239127 | 2.63E-08 | 995888 | 0.101392  | -0.013306   | 0.0023913  | 2.63E-08 | 0          |
| 14  | rs112635299 | 94838142  | T    | 0.02004 | 0.0381296   | 0.0052514  | 3.85E-13 | 935546 | 0.0168986 | 0.0381296   | 0.00525154 | 3.85E-13 | 0          |
| 15  | rs8040868   | 78911181  | C    | 0.3877  | 0.0227831   | 0.00147048 | 3.83E-54 | 986875 | 0.416501  | 0.0227831   | 0.00147066 | 3.94E-54 | 0          |
| 17  | rs62065216  | 38218773  | A    | 0.4436  | 0.00901066  | 0.00148128 | 1.18E-09 | 935562 | 0.417495  | 0.00901066  | 0.00148131 | 1.18E-09 | 0          |
| 18  | rs9964724   | 35159124  | T    | 0.7011  | -0.0100395  | 0.00155814 | 1.17E-10 | 995877 | 0.667992  | -0.0103213  | 0.0015589  | 3.57E-11 | 0.0317613  |
| 18  | rs2567177   | 38450197  | C    | 0.3617  | 0.00884711  | 0.00154539 | 1.04E-08 | 918925 | 0.327038  | 0.00915942  | 0.00154614 | 3.14E-09 | 0          |
| 20  | rs6011779   | 61984317  | T    | 0.7938  | -0.0147202  | 0.00176303 | 6.86E-17 | 995849 | 0.809145  | -0.0147202  | 0.0017631  | 6.88E-17 | 0          |

Supplementary Table S3. Pleiotropic genomic loci in COPD and (GERD, appendicitis, IBS, diverticular disease, acute gastritis, acute pancreatitis, chronic pancreatitis, functional gastrointestinal disorder, and alcoholic liver disease) Identified by FUMA using LPACO results

| rsID        | GenomicLocus    | unliqID   | chr.x    | pos.x     | p         | start | end | nSNPs | nGWASNSPs      | nIndSigSNPs | IndSigSNPs | nLeadSNPs              | LeadSNPs | dist.x    | unliqID.y | chr.y | pos.y    | non_effect_allele | effect_allele | MAF         | gwasP | r2                   | IndSigSNP | GenomicLocus.y | nearestGene | dist.y | func | CADD | RDB | minChrState | commonChrState | posMapFit | eqtlMapFit | cIMapFit | group    |       |       |        |       |
|-------------|-----------------|-----------|----------|-----------|-----------|-------|-----|-------|----------------|-------------|------------|------------------------|----------|-----------|-----------|-------|----------|-------------------|---------------|-------------|-------|----------------------|-----------|----------------|-------------|--------|------|------|-----|-------------|----------------|-----------|------------|----------|----------|-------|-------|--------|-------|
| rs181026312 | 7:142540047     | 142540042 | 2.29E-09 | 141857339 | 142540042 | 9     | 2   | 2     | rs181026312rs1 | rs181026312 | NA         | 7:142540042.CT         | 7        | 142540042 | T         | C     | 0.002982 | 2.29E-09          | 1             | rs181026312 | 2     | EPHBE                | 12749     | intergenic     | 1.635       | 3a     | 5    | 15   | 0   | 0           | 0              | 0         | ACUTPANC   |          |          |       |       |        |       |
| rs554919880 | 5:14720433      | 14720433  | 7.25E-10 | 147183902 | 147243796 | 27    | 24  | 2     | rs554919880rs1 | rs554919880 | NA         | 5:147204334.G-GA AAA   | 5        | 147204334 | G         | GAAAA | 0.007952 | 7.25E-10          | 1             | rs554919880 | 1     | SPINK1               | 0         | intronic       | 4.359       | NA     | 5    | 15   | 1   | 0           | 0              | 0         | 0          | ACUTPANC |          |       |       |        |       |
| rs61204866  | 5:157801528015  | 780152801 | 3.81E-11 | 7871929   | 78934531  | 210   | 135 | 5     | rs61204866rs7  | rs61204866  | NA         | 5:15780152801.A-G      | 15       | 78815296  | G         | A     | 0.2356   | 3.81E-11          | 1             | rs61204866  | 1     | HYKK                 | 0         | intronic       | 5.367       | 6      | 5    | 15   | 1   | 0           | 0              | 0         | 0          | ACUTPANC |          |       |       |        |       |
| rs659567    | 8:18607408.8    | 1067400   | 3.54E-08 | 10384212  | 10796472  | 146   | 91  | 1     | rs659567       | rs659567    | NA         | 8:18607408.CT          | 8        | 1067400   | T         | T     | 0.4284   | 3.54E-08          | 1             | rs659567    | 1     | SOX7:SOX7:CT:0.00.00 | 0         | ncRNA_intronic | 2.714       | 6      | 9    | 15   | 1   | 0           | 0              | 0         | 0          | 0        | ACUTPANC |       |       |        |       |
| rs112635299 | 14:9483814214   | 94838142  | 1.36E-08 | 94838142  | 94844947  | 2     | 1   | 1     | rs112635299    | rs112635299 | NA         | 14:94838142.CT         | 14       | 94838142  | G         | T     | 0.0169   | 1.36E-08          | 1             | rs112635299 | 1     | SERPINA1             | 4941      | intergenic     | 0.272       | 5      | 5    | 15   | 1   | 0           | 0              | 0         | 0          | 0        | 0        | ALCO  |       |        |       |
| rs1284466   | 3:22443021322   | 44330213  | 2.49E-08 | 44324277  | 44381482  | 76    | 61  | 1     | rs1284466      | rs1284466   | NA         | 3:224430213.A-G        | 22       | 44330213  | A         | G     | 0.1799   | 2.49E-08          | 1             | rs1284466   | 3     | PNPLA3               | 0         | intronic       | 2.838       | 6      | 4    | 14   | 1   | 0           | 0              | 0         | 0          | 0        | 0        | ALCO  |       |        |       |
| rs58365910  | 15:7894903415   | 78949034  | 2.89E-12 | 78719291  | 79074518  | 248   | 160 | 3     | rs58365910rs1  | rs58365910  | NA         | 15:78949034.CT         | 15       | 78949034  | T         | C     | 0.3748   | 2.89E-12          | 1             | rs58365910  | 2     | PSMA4                | 7429      | intergenic     | 3.16        | 6      | 5    | 15   | 1   | 0           | 0              | 0         | 0          | 0        | 0        | 0     | ALCO  |        |       |
| rs1322296   | 4:1454346884    | 145434688 | 3.11E-09 | 145433890 | 145516737 | 39    | 26  | 1     | rs1322296      | rs1322296   | NA         | 4:145434688.CT         | 4        | 145434688 | T         | C     | 0.4076   | 3.11E-09          | 1             | rs1322296   | 4     | RP11-361D14.24534    | 0         | intergenic     | 0.284       | 7      | 14   | 15   | 0   | 0           | 0              | 0         | 0          | 0        | 0        | 0     | APPEN |        |       |
| rs112635299 | 14:9483814214   | 94838142  | 1.61E-10 | 94838142  | 94844947  | 2     | 1   | 1     | rs112635299    | rs112635299 | NA         | 14:94838142.CT         | 14       | 94838142  | G         | T     | 0.0169   | 1.61E-10          | 1             | rs112635299 | 5     | SERPINA1             | 4941      | intergenic     | 0.272       | 5      | 5    | 15   | 1   | 0           | 0              | 0         | 0          | 0        | 0        | APPEN |       |        |       |
| rs3197999   | 3:349721532     | 349721532 | 4.19E-09 | 34983550  | 49731861  | 140   | 89  | 1     | rs3197999      | rs3197999   | NA         | 3:349721532.A-G        | 3        | 49721532  | G         | A     | 0.3131   | 4.19E-09          | 1             | rs3197999   | 2     | MST1                 | 21        | exonic         | 2.1         | NA     | 4    | 15   | 1   | 0           | 0              | 0         | 0          | 0        | 0        | 0     | APPEN |        |       |
| rs35700343  | 1:1221052802    | 221052802 | 4.34E-08 | 221052802 | 221052802 | 2     | 2   | 1     | rs35700343     | rs35700343  | NA         | 1:1221052802.CT        | 1        | 221052802 | CT        | A     | 0.174    | 4.34E-08          | 1             | rs35700343  | 1     | HLA-AS1:HLA-XL:0.00  | 0         | ncRNA_intronic | 2.054       | NA     | 1    | 15   | 1   | 0           | 0              | 0         | 0          | 0        | 0        | 0     | APPEN |        |       |
| rs653330    | 4:1117319364    | 111731936 | 1.02E-11 | 111719408 | 11173700  | 13    | 11  | 1     | rs653330       | rs653330    | NA         | 4:111731936.CT         | 4        | 111731936 | G         | C     | 0.4086   | 1.02E-11          | 1             | rs653330    | 3     | RP11-777N19.113435   | 0         | intergenic     | 8.148       | 7      | 14   | 15   | 0   | 0           | 0              | 0         | 0          | 0        | 0        | 0     | APPEN |        |       |
| rs8042849   | 15:7881792915   | 78817929  | 1.45E-09 | 78719591  | 78936168  | 84    | 55  | 1     | rs8042849      | rs8042849   | NA         | 15:78817929.CT         | 15       | 78817929  | C         | T     | 0.3907   | 1.45E-09          | 1             | rs8042849   | 6     | HYKK                 | 0         | intronic       | 1.935       | 7      | 5    | 15   | 1   | 0           | 0              | 0         | 0          | 0        | 0        | 0     | APPEN |        |       |
| rs113812546 | 7:1169678387    | 116967838 | 5.07E-12 | 116806103 | 117357607 | 15    | 14  | 5     | rs113812546rs2 | rs113812546 | NA         | 7:116967838.A-C        | 7        | 116967838 | C         | A     | 0.01988  | 5.07E-12          | 1             | rs113812546 | 2     | WNT2                 | 4494      | intergenic     | 0.408       | 4      | 5    | 14   | 1   | 0           | 0              | 0         | 0          | 0        | 0        | 0     | 0     | CHRONC |       |
| rs3691084   | 15:7907425315   | 79074253  | 1.50E-08 | 78905299  | 79105350  | 137   | 73  | 1     | rs3691084      | rs3691084   | NA         | 15:79074253.A-G        | 15       | 79074253  | G         | A     | 0.4195   | 1.50E-08          | 1             | rs3691084   | 3     | ADAMTS7              | 0         | intronic       | 5.219       | 5      | 4    | 15   | 1   | 0           | 0              | 0         | 0          | 0        | 0        | 0     | 0     | CHRONC |       |
| rs554919880 | 5:14720433      | 14720433  | 5.89E-10 | 147183902 | 147234796 | 27    | 24  | 2     | rs554919880rs1 | rs554919880 | NA         | 5:147204334.G-GA AAA   | 5        | 147204334 | G         | GAAAA | 0.007952 | 5.89E-10          | 1             | rs554919880 | 1     | SPINK1               | 0         | intronic       | 4.359       | NA     | 5    | 15   | 1   | 0           | 0              | 0         | 0          | 0        | 0        | 0     | 0     | CHRONC |       |
| rs10928235  | 2:1456781142    | 145678114 | 8.53E-11 | 145634153 | 145754503 | 3     | 25  | 1     | rs10928235     | rs10928235  | NA         | 2:145678114.A-T        | 2        | 145678114 | A         | T     | 0.2256   | 8.53E-11          | 1             | rs10928235  | 5     | TEXA1                | 0         | ncRNA_intronic | 1.195       | 6      | 5    | 15   | 1   | 0           | 0              | 0         | 0          | 0        | 0        | 0     | 0     | DIVER  |       |
| rs112635299 | 14:9483814214   | 94838142  | 1.68E-09 | 94838142  | 94844947  | 2     | 1   | 1     | rs112635299    | rs112635299 | NA         | 14:94838142.CT         | 14       | 94838142  | G         | T     | 0.0169   | 1.68E-09          | 1             | rs112635299 | 17    | SERPINA1             | 4941      | intergenic     | 0.272       | 5      | 5    | 15   | 1   | 0           | 0              | 0         | 0          | 0        | 0        | 0     | 0     | DIVER  |       |
| rs11677892  | 2:1444307112    | 144430711 | 1.97E-11 | 144274527 | 144503445 | 149   | 88  | 8     | rs11677892     | rs11677892  | NA         | 2:144430711.A-G        | 2        | 144430711 | A         | G     | 0.3678   | 1.97E-11          | 1             | rs11677892  | 4     | ARHGAP15             | 0         | intronic       | 1.799       | 6      | 4    | 15   | 1   | 0           | 0              | 0         | 0          | 0        | 0        | 0     | 0     | DIVER  |       |
| rs117210485 | 9:1363881489    | 136388148 | 2.95E-08 | 136248480 | 136388148 | 6     | 5   | 1     | rs117210485    | rs117210485 | NA         | 9:136388148.A-G        | 9        | 136388148 | G         | A     | 0.04274  | 2.95E-08          | 1             | rs117210485 | 13    | TMEM80               | 0         | intronic       | 0.556       | 2      | 15   | 15   | 1   | 0           | 0              | 0         | 0          | 0        | 0        | 0     | 0     | DIVER  |       |
| rs11748149  | 5:1569773935    | 156977393 | 6.15E-09 | 156942628 | 157040002 | 66    | 53  | 1     | rs11748149     | rs11748149  | NA         | 5:156977393.A-G        | 5        | 156977393 | G         | A     | 0.1014   | 6.15E-09          | 1             | rs11748149  | 10    | ADAM19               | 0         | intronic       | 2.166       | 1f     | 2    | 15   | 1   | 0           | 0              | 0         | 0          | 0        | 0        | 0     | 0     | DIVER  |       |
| rs11899380  | 2:256079696.2   | 56079696  | 1.63E-12 | 55992410  | 56102744  | 23    | 18  | 2     | rs11899380rs1  | rs11899380  | NA         | 2:256079696.A-G        | 2        | 56079696  | G         | A     | 0.1233   | 1.63E-12          | 1             | rs11899380  | 3     | EFEMP1               | 13492     | intergenic     | 5.502       | 7      | 5    | 15   | 0   | 0           | 0              | 0         | 0          | 0        | 0        | 0     | 0     | DIVER  |       |
| rs13862788  | 9:128385974     | 128385974 | 2.96E-09 | 128152244 | 128495888 | 233   | 159 | 2     | rs13862788rs1  | rs13862788  | NA         | 9:128385974.G-GCTCTCCC | 9        | 128385974 | GCTCTCCC  | G     | 0.4672   | 2.96E-09          | 1             | rs13862788  | 12    | MARPKAP1             | 0         | intronic       | 1.083       | NA     | 5    | 15   | 1   | 0           | 0              | 0         | 0          | 0        | 0        | 0     | 0     | DIVER  |       |
| rs1568083   | 18:157667091615 | 76679016  | 5.16E-11 | 76382015  | 77251889  | 626   | 420 | 5     | rs1568083rs441 | rs1568083   | NA         | 18:1576670916.CT       | 15       | 7670916   | C         | T     | 0.1172   | 5.16E-11          | 1             | rs1568083   | 18    | SCAPER               | 0         | intronic       | 1.525       | 6      | 5    | 15   | 1   | 0           | 0              | 0         | 0          | 0        | 0        | 0     | 0     | DIVER  |       |
| rs183775180 | 20:2041387520   | 20413875  | 2.83E-08 | 20413875  | 20727438  | 3     | 3   | 1     | rs183775180    | rs183775180 | NA         | 20:20413875.CT         | 20       | 20413875  | T         | C     | 0.00497  | 2.83E-08          | 1             | rs183775180 | 24    | RALGAP2              | 0         | intronic       | 0.871       | 7      | 4    | 15   | 1   | 0           | 0              | 0         | 0          | 0        | 0        | 0     | 0     | DIVER  |       |
| rs1876767   | 2:222609832.2   | 22609832  | 2.08E-10 | 22431110  | 22606275  | 138   | 82  | 2     | rs1876767rs11  | rs1876767   | NA         | 2:222609832.G-T        | 2        | 22609832  | G         | T     | 0.3728   | 2.08E-10          | 1             | rs1876767   | 2     | ACOR8490.2:AC0000    | 0         | ncRNA_intronic | 0.427       | 7      | 5    | 15   | 0   | 0           | 0              | 0         | 0          | 0        | 0        | 0     | 0     | DIVER  |       |
| rs2038527   | 15:7885161515   | 78851615  | 2.44E-09 | 78719501  | 78936168  | 89    | 55  | 1     | rs2038527      | rs2038527   | NA         | 15:78851615.A-G        | 15       | 78851615  | G         | A     | 0.3738   | 2.44E-09          | 1             | rs2038527   | 19    | CHRNA5               | 6246      | intergenic     | 7.964       | NA     | 5    | 15   | 1   | 0           | 0              | 0         | 0          | 0        | 0        | 0     | 0     | DIVER  |       |
| rs2330552   | 8:544415578.5   | 44415578  | 5.83E-10 | 44406517  | 44566335  | 44    | 32  | 1     | rs2330552      | rs2330552   | NA         | 8:544415578.A-C        | 8        | 44415578  | A         | C     | 0.4415   | 5.83E-10          | 1             | rs2330552   | 8     | FGF10-AS1            | 1486      | intergenic     | 1.164       | 6      | 5    | 15   | 0   | 0           | 0              | 0         | 0          | 0        | 0        | 0     | 0     | DIVER  |       |
| rs2473302   | 1:122353824     | 22353824  | 2.66E-08 | 22351976  | 22470115  | 80    | 44  | 1     | rs2473302      | rs2473302   | NA         | 1:12235382.CT          | 1        | 2235382   | C         | T     | 0.2644   | 2.66E-08          | 1             | rs2473302   | 1     | LINC00339            | 0         | ncRNA_intronic | 7.619       | NA     | 1    | 15   | 0   | 0           | 0              | 0         | 0          | 0        | 0        | 0     | 0     | 0      | DIVER |
| rs276216    | 10:106089640    | 106089648 | 1.07E-09 | 106077586 | 106111179 | 41    | 24  | 1     | rs276216       | rs276216    | NA         | 10:106089648.A-G       | 10       | 106089648 | A         | G     | 0.3459   | 1.07E-09          | 1             | rs276216    | 15    | TPRP                 | 0         | UTRS           | 8.898       | NA     | 1    | 15   | 1   | 0           | 0              | 0         | 0          | 0        | 0        | 0     | 0     | DIVER  |       |
| rs28544299  | 4:7860512.44    | 7860512   | 1.89E-08 | 7844754   | 7939080   | 94    | 58  | 1     | rs28544299     | rs28544299  | NA         | 4:7860512.C            | 4        | 7860512</ |           |       |          |                   |               |             |       |                      |           |                |             |        |      |      |     |             |                |           |            |          |          |       |       |        |       |

**Supplementary Table S4. The annotation in fuma based on the result of MAGMA**

| GENE            | CHR | START     | STOP      | NSNPS | NPARAM | N      | ZSTAT  | P        | SYMBOL        | FDR        |
|-----------------|-----|-----------|-----------|-------|--------|--------|--------|----------|---------------|------------|
| ENSG00000162670 | 1   | 190066792 | 190446759 | 1056  | 68     | 368428 | 4.3538 | 6.69E-06 | BRINP3        | 0.01061482 |
| ENSG00000164266 | 5   | 147204131 | 147211349 | 23    | 10     | 368428 | 5.0401 | 2.33E-07 | SPINK1        | 0.0010884  |
| ENSG00000188107 | 6   | 64429876  | 66417118  | 8089  | 222    | 368428 | 3.8403 | 6.14E-05 | EYS           | 0.04522202 |
| ENSG00000154438 | 7   | 117003276 | 117068177 | 140   | 38     | 368428 | 3.8318 | 6.36E-05 | ASZ1          | 0.04522202 |
| ENSG00000171044 | 8   | 10753555  | 11058875  | 1321  | 66     | 368428 | 4.3501 | 6.81E-06 | XKR6          | 0.01061482 |
| ENSG00000171056 | 8   | 10581278  | 10697357  | 630   | 35     | 368428 | 4.0362 | 2.72E-05 | SOX7          | 0.02825066 |
| ENSG00000173273 | 8   | 9413424   | 9639856   | 977   | 39     | 368428 | 4.471  | 3.89E-06 | TNKS          | 0.00910818 |
| ENSG00000184608 | 8   | 11225911  | 11296167  | 382   | 56     | 368428 | 3.7995 | 7.25E-05 | C8orf12       | 0.04670262 |
| ENSG00000258724 | 8   | 10582909  | 10697357  | 620   | 34     | 368428 | 3.9941 | 3.25E-05 | SOX7          | 0.02894427 |
| ENSG00000204682 | 10  | 21781587  | 21786191  | 11    | 5      | 368428 | 3.826  | 6.51E-05 | CASC10        | 0.04522202 |
| ENSG00000149295 | 11  | 113280318 | 113346413 | 231   | 47     | 368428 | 4.0434 | 2.63E-05 | DRD2          | 0.02825066 |
| ENSG00000110851 | 12  | 108126643 | 108155049 | 99    | 17     | 368428 | 4.2036 | 1.31E-05 | PRDM4         | 0.01639322 |
| ENSG00000136045 | 12  | 108079509 | 108106944 | 94    | 22     | 368428 | 3.7834 | 7.73E-05 | PWP1          | 0.04670262 |
| ENSG00000100711 | 14  | 104182067 | 104200005 | 68    | 26     | 368428 | 4.3821 | 5.88E-06 | ZFYVE21       | 0.01061482 |
| ENSG00000041357 | 15  | 78832747  | 78841604  | 38    | 11     | 368428 | 4.3957 | 5.52E-06 | PSMA4         | 0.01061482 |
| ENSG00000080644 | 15  | 78885394  | 78913637  | 116   | 22     | 368428 | 5.306  | 5.60E-08 | CHRNA3        | 0.00039559 |
| ENSG00000103591 | 15  | 67493371  | 67547533  | 153   | 27     | 368428 | 4.6306 | 1.82E-06 | AAGAB         | 0.00487577 |
| ENSG00000103599 | 15  | 67547138  | 67794598  | 609   | 59     | 368428 | 3.9977 | 3.20E-05 | IQCH          | 0.02894427 |
| ENSG00000117971 | 15  | 78916461  | 79020096  | 347   | 50     | 368428 | 3.7892 | 7.56E-05 | CHRN4         | 0.04670262 |
| ENSG00000136381 | 15  | 78729773  | 78793798  | 165   | 30     | 368428 | 5.694  | 6.21E-09 | IREB2         | 0.00011617 |
| ENSG00000166949 | 15  | 67356101  | 67487533  | 452   | 82     | 368428 | 3.7725 | 8.08E-05 | SMAD3         | 0.04727114 |
| ENSG00000169684 | 15  | 78857862  | 78887611  | 87    | 22     | 368428 | 5.2834 | 6.34E-08 | CHRNA5        | 0.00039559 |
| ENSG00000188266 | 15  | 78799906  | 78829714  | 108   | 16     | 368428 | 4.6986 | 1.31E-06 | HYKK          | 0.00408676 |
| ENSG00000099365 | 16  | 31000577  | 31021949  | 42    | 13     | 368428 | 3.867  | 5.51E-05 | STX1B         | 0.04483449 |
| ENSG00000103496 | 16  | 31044210  | 31054296  | 21    | 8      | 368428 | 4.3023 | 8.45E-06 | STX4          | 0.01217116 |
| ENSG00000103507 | 16  | 31117428  | 31124110  | 16    | 9      | 368428 | 4.2613 | 1.02E-05 | BCKDK         | 0.01358526 |
| ENSG00000103510 | 16  | 31127075  | 31142714  | 39    | 15     | 368428 | 3.8188 | 6.70E-05 | KAT8          | 0.04522202 |
| ENSG00000151006 | 16  | 31094746  | 31100949  | 20    | 9      | 368428 | 3.8166 | 6.76E-05 | PRSS53        | 0.04522202 |
| ENSG00000167395 | 16  | 31085743  | 31095517  | 25    | 13     | 368428 | 4.1665 | 1.55E-05 | ZNF646        | 0.01808978 |
| ENSG00000167397 | 16  | 31102163  | 31107301  | 8     | 4      | 368428 | 3.8774 | 5.28E-05 | VKORC1        | 0.04483449 |
| ENSG00000255439 | 16  | 31094760  | 31106277  | 28    | 12     | 368428 | 4.0104 | 3.03E-05 | RP11-196G11.1 | 0.02894427 |
| ENSG00000130203 | 19  | 45409011  | 45412650  | 9     | 5      | 368428 | 4.7022 | 1.29E-06 | APOE          | 0.00408676 |
| ENSG00000152061 | 1   | 174128548 | 174964445 | 2461  | 46     | 403294 | 4.2048 | 1.31E-05 | RABGAP1L      | 0.01793051 |

| GENE            | CHR | START     | STOP      | NSNPS | NPARAM | N      | ZSTAT  | P          | SYMBOL         | FDR        |
|-----------------|-----|-----------|-----------|-------|--------|--------|--------|------------|----------------|------------|
| ENSG00000184588 | 1   | 66258197  | 66840259  | 2117  | 141    | 403294 | 4.432  | 4.67E-06   | PDE4B          | 0.01092032 |
| ENSG00000158092 | 3   | 136581050 | 136668665 | 255   | 23     | 403294 | 4.1575 | 1.61E-05   | NCK1           | 0.01881627 |
| ENSG00000168917 | 3   | 136537489 | 136574734 | 113   | 16     | 403294 | 4.2304 | 1.17E-05   | SLC35G2        | 0.01793051 |
| ENSG00000105963 | 7   | 937540    | 995043    | 355   | 71     | 403294 | 3.9788 | 3.46E-05   | ADAP1          | 0.02549669 |
| ENSG00000164850 | 7   | 1121844   | 1133451   | 72    | 27     | 403294 | 4.3578 | 6.57E-06   | GPBR1          | 0.01366248 |
| ENSG00000178381 | 7   | 1191707   | 1200395   | 68    | 18     | 403294 | 4.5337 | 2.90E-06   | ZFAND2A        | 0.01085157 |
| ENSG00000240230 | 7   | 938415    | 1015235   | 469   | 84     | 403294 | 4.2142 | 1.25E-05   | COX19          | 0.01793051 |
| ENSG00000136574 | 8   | 11534468  | 11617511  | 384   | 68     | 403294 | 3.848  | 5.95E-05   | GATA4          | 0.03714837 |
| ENSG00000171044 | 8   | 10753555  | 11058875  | 1321  | 66     | 403294 | 4.0856 | 2.20E-05   | XKR6           | 0.02176115 |
| ENSG00000175806 | 8   | 9911778   | 10286401  | 1874  | 123    | 403294 | 3.9206 | 4.42E-05   | MSRA           | 0.02952297 |
| ENSG00000182319 | 8   | 8175258   | 8244008   | 292   | 44     | 403294 | 4.1631 | 1.57E-05   | SGK223         | 0.01881627 |
| ENSG00000184608 | 8   | 11225911  | 11296167  | 382   | 56     | 403294 | 4.4932 | 3.51E-06   | C8orf12        | 0.01092032 |
| ENSG00000255098 | 8   | 11870545  | 11873043  | 13    | 6      | 403294 | 3.8103 | 6.94E-05   | RP11-481A20.11 | 0.04190538 |
| ENSG00000125952 | 14  | 65472892  | 65569413  | 369   | 57     | 403294 | 4.4384 | 4.53E-06   | MAX            | 0.01092032 |
| ENSG00000125954 | 14  | 65381203  | 65528521  | 577   | 72     | 403294 | 3.9729 | 3.55E-05   | CHURC1-FNTB    | 0.02549669 |
| ENSG00000257365 | 14  | 65381203  | 65529368  | 579   | 74     | 403294 | 4.0346 | 2.73E-05   | FNTB           | 0.02517571 |
| ENSG00000080644 | 15  | 78885394  | 78913637  | 116   | 22     | 403294 | 5.272  | 6.75E-08   | CHRNA3         | 0.0003157  |
| ENSG00000117971 | 15  | 78916461  | 79020096  | 347   | 50     | 403294 | 5.739  | 4.76E-09   | CHRNA4         | 4.46E-05   |
| ENSG00000136378 | 15  | 79051545  | 79103773  | 265   | 32     | 403294 | 4.1989 | 1.34E-05   | ADAMTS7        | 0.01793051 |
| ENSG00000136381 | 15  | 78729773  | 78793798  | 165   | 30     | 403294 | 5.5744 | 1.24E-08   | IREB2          | 7.75E-05   |
| ENSG00000169684 | 15  | 78857862  | 78887611  | 87    | 22     | 403294 | 5.909  | 1.72E-09   | CHRNA5         | 3.22E-05   |
| ENSG00000188266 | 15  | 78799906  | 78829714  | 108   | 16     | 403294 | 4.2146 | 1.25E-05   | HYKK           | 0.01793051 |
| ENSG00000174939 | 16  | 29911696  | 29931185  | 43    | 19     | 403294 | 3.867  | 5.51E-05   | ASPHD1         | 0.03556549 |
| ENSG00000174943 | 16  | 29916333  | 29938356  | 59    | 19     | 403294 | 4.0845 | 2.21E-05   | KCTD13         | 0.02176115 |
| ENSG00000120071 | 17  | 44107282  | 44302733  | 964   | 13     | 403294 | 3.975  | 3.52E-05   | KANSL1         | 0.02549669 |
| ENSG00000120088 | 17  | 43699267  | 43913194  | 1172  | 16     | 403294 | 4.027  | 2.82E-05   | CRHR1          | 0.02517571 |
| ENSG00000185294 | 17  | 43922256  | 43924438  | 11    | 2      | 403294 | 3.9645 | 3.68E-05   | SPPL2C         | 0.02549669 |
| ENSG00000186868 | 17  | 43971748  | 44105700  | 802   | 11     | 403294 | 3.9697 | 3.60E-05   | MAPT           | 0.02549669 |
| ENSG00000256762 | 17  | 44076616  | 44077060  | 1     | 1      | 403294 | 3.9777 | 3.48E-05   | STH            | 0.02549669 |
| ENSG00000101204 | 20  | 61975420  | 62009753  | 205   | 51     | 403294 | 4.1385 | 1.75E-05   | CHRNA4         | 0.0192421  |
| ENSG00000116544 | 1   | 35331037  | 35395186  | 158   | 62     | 409710 | 4.1882 | 1.41E-05   | DLGAP3         | 0.00773934 |
| ENSG00000152061 | 1   | 174128548 | 174964445 | 2461  | 46     | 409710 | 4.0118 | 3.01E-05   | RABGAP1L       | 0.01295456 |
| ENSG00000135999 | 2   | 149402009 | 149545130 | 462   | 33     | 409710 | 4.0192 | 2.92E-05   | EPC2           | 0.01295456 |
| ENSG00000004534 | 3   | 49977440  | 50137478  | 376   | 35     | 409710 | 3.7271 | 9.69E-05   | RBM6           | 0.03072798 |
| ENSG00000067560 | 3   | 49396578  | 49450431  | 132   | 28     | 409710 | 4.7096 | 1.24E-06   | RHOA           | 0.00232234 |
| ENSG00000145020 | 3   | 49454211  | 49460186  | 7     | 3      | 409710 | 3.6133 | 0.00015114 | AMT            | 0.04562965 |

| GENE            | CHR | START     | STOP      | NSNPS | NPARAM | N      | ZSTAT  | P          | SYMBOL       | FDR        |
|-----------------|-----|-----------|-----------|-------|--------|--------|--------|------------|--------------|------------|
| ENSG00000145022 | 3   | 49449639  | 49453908  | 10    | 5      | 409710 | 5.1549 | 1.27E-07   | TCTA         | 0.0007673  |
| ENSG00000145029 | 3   | 49460379  | 49466759  | 8     | 5      | 409710 | 4.8665 | 5.68E-07   | NICN1        | 0.0017715  |
| ENSG00000164061 | 3   | 49591922  | 49708978  | 248   | 45     | 409710 | 5.5804 | 1.20E-08   | BSN          | 0.00022462 |
| ENSG00000164062 | 3   | 49711435  | 49721396  | 14    | 10     | 409710 | 4.3855 | 5.79E-06   | APEH         | 0.00515841 |
| ENSG00000164068 | 3   | 49726932  | 49758962  | 76    | 24     | 409710 | 4.2459 | 1.09E-05   | RNF123       | 0.00688698 |
| ENSG00000164077 | 3   | 49946302  | 49967606  | 35    | 13     | 409710 | 4.3422 | 7.05E-06   | MON1A        | 0.00557024 |
| ENSG00000164078 | 3   | 49924435  | 49941299  | 26    | 12     | 409710 | 3.8562 | 5.76E-05   | MST1R        | 0.02072659 |
| ENSG00000172037 | 3   | 49158547  | 49170551  | 17    | 12     | 409710 | 3.8328 | 6.33E-05   | LAMB2        | 0.02237013 |
| ENSG00000173402 | 3   | 49506146  | 49573048  | 146   | 31     | 409710 | 4.5771 | 2.36E-06   | DAG1         | 0.00294122 |
| ENSG00000173531 | 3   | 49721380  | 49726934  | 7     | 4      | 409710 | 5.4135 | 3.09E-08   | MST1         | 0.00028922 |
| ENSG00000176095 | 3   | 49761727  | 49823975  | 133   | 27     | 409710 | 4.2916 | 8.87E-06   | IP6K1        | 0.00592886 |
| ENSG00000182179 | 3   | 49842640  | 49851379  | 21    | 11     | 409710 | 3.943  | 4.02E-05   | UBA7         | 0.01609828 |
| ENSG00000183763 | 3   | 49866034  | 49894007  | 56    | 18     | 409710 | 4.1665 | 1.55E-05   | TRAIIP       | 0.00827282 |
| ENSG00000187492 | 3   | 49828165  | 49837268  | 20    | 11     | 409710 | 4.2209 | 1.22E-05   | CDHR4        | 0.00711752 |
| ENSG00000228008 | 3   | 49941278  | 49954370  | 19    | 8      | 409710 | 3.8952 | 4.91E-05   | CTD-2330K9.3 | 0.01874283 |
| ENSG00000233276 | 3   | 49394609  | 49396033  | 3     | 1      | 409710 | 4.6296 | 1.83E-06   | GPX1         | 0.00263708 |
| ENSG00000138785 | 4   | 106603784 | 106817143 | 757   | 30     | 409710 | 3.7474 | 8.93E-05   | INTS12       | 0.02882637 |
| ENSG00000164093 | 4   | 111538579 | 111563279 | 66    | 23     | 409710 | 4.1154 | 1.93E-05   | PITX2        | 0.00977535 |
| ENSG00000064652 | 5   | 122179134 | 122365049 | 794   | 37     | 409710 | 4.2052 | 1.30E-05   | SNX24        | 0.00739871 |
| ENSG00000145868 | 5   | 147763498 | 147822399 | 173   | 35     | 409710 | 4.2428 | 1.10E-05   | FBXO38       | 0.00688698 |
| ENSG00000145879 | 5   | 147691982 | 147695485 | 16    | 6      | 409710 | 4.7923 | 8.25E-07   | SPINK7       | 0.00192919 |
| ENSG00000204909 | 5   | 147700766 | 147719412 | 85    | 17     | 409710 | 4.4912 | 3.54E-06   | SPINK9       | 0.00414323 |
| ENSG00000268126 | 5   | 147698550 | 147701891 | 24    | 8      | 409710 | 4.7191 | 1.18E-06   | AC091948.1   | 0.00232234 |
| ENSG00000104408 | 8   | 109213445 | 109447562 | 969   | 46     | 409710 | 5.024  | 2.53E-07   | EIF3E        | 0.00094717 |
| ENSG00000104412 | 8   | 109455830 | 109499145 | 149   | 19     | 409710 | 3.8024 | 7.16E-05   | EMC2         | 0.02483463 |
| ENSG00000164989 | 9   | 15552895  | 16061661  | 1960  | 42     | 409710 | 3.9879 | 3.33E-05   | CCDC171      | 0.01386505 |
| ENSG00000119919 | 10  | 101292690 | 101296278 | 10    | 5      | 409710 | 4.0116 | 3.02E-05   | NKX2-3       | 0.01295456 |
| ENSG00000138193 | 10  | 95753746  | 96092580  | 1096  | 116    | 409710 | 4.0093 | 3.05E-05   | PLCE1        | 0.01295456 |
| ENSG00000148834 | 10  | 105995114 | 106027217 | 91    | 26     | 409710 | 3.5852 | 0.0001684  | GSTO1        | 0.04925174 |
| ENSG00000134825 | 11  | 61535973  | 61560274  | 51    | 17     | 409710 | 3.749  | 8.88E-05   | TMEM258      | 0.02882637 |
| ENSG00000149485 | 11  | 61567099  | 61596790  | 60    | 15     | 409710 | 3.9419 | 4.04E-05   | FADS1        | 0.01609828 |
| ENSG00000080644 | 15  | 78885394  | 78913637  | 116   | 22     | 409710 | 4.3551 | 6.65E-06   | CHRNA3       | 0.00557024 |
| ENSG00000103855 | 15  | 73976307  | 74006859  | 127   | 28     | 409710 | 3.6709 | 0.00012086 | CD276        | 0.03770429 |
| ENSG00000117971 | 15  | 78916461  | 79020096  | 347   | 50     | 409710 | 5.1066 | 1.64E-07   | CHRN4        | 0.0007673  |
| ENSG00000136378 | 15  | 79051545  | 79103773  | 265   | 32     | 409710 | 3.7963 | 7.34E-05   | ADAMTS7      | 0.02498955 |
| ENSG00000136381 | 15  | 78729773  | 78793798  | 165   | 30     | 409710 | 3.8659 | 5.53E-05   | IREB2        | 0.02030793 |

| GENE            | CHR | START     | STOP      | NSNPS | NPARAM | N      | ZSTAT  | P          | SYMBOL   | FDR        |
|-----------------|-----|-----------|-----------|-------|--------|--------|--------|------------|----------|------------|
| ENSG00000169684 | 15  | 78857862  | 78887611  | 87    | 22     | 409710 | 4.7961 | 8.09E-07   | CHRNA5   | 0.00192919 |
| ENSG00000256061 | 15  | 55702723  | 55800432  | 436   | 46     | 409710 | 4.1484 | 1.67E-05   | DYX1C1   | 0.00870335 |
| ENSG00000260916 | 15  | 55632230  | 55700708  | 326   | 31     | 409710 | 4.3394 | 7.14E-06   | CCPG1    | 0.00557024 |
| ENSG00000261652 | 15  | 55700746  | 55710962  | 55    | 15     | 409710 | 4.2217 | 1.21E-05   | C15orf65 | 0.00711752 |
| ENSG00000168488 | 16  | 28834356  | 28848558  | 43    | 9      | 409710 | 4.6479 | 1.68E-06   | ATXN2L   | 0.00261568 |
| ENSG00000176476 | 16  | 28565236  | 28603111  | 135   | 27     | 409710 | 4.0978 | 2.09E-05   | CCDC101  | 0.01027076 |
| ENSG00000177548 | 16  | 28915742  | 28947847  | 68    | 32     | 409710 | 4.3018 | 8.47E-06   | RABEP2   | 0.00592127 |
| ENSG00000178188 | 16  | 28857921  | 28885526  | 74    | 13     | 409710 | 4.6065 | 2.05E-06   | SH2B1    | 0.00273791 |
| ENSG00000178952 | 16  | 28853732  | 28857729  | 6     | 3      | 409710 | 4.0844 | 2.21E-05   | TUFM     | 0.01050969 |
| ENSG00000184730 | 16  | 28505970  | 28510291  | 10    | 5      | 409710 | 4.307  | 8.28E-06   | APOBR    | 0.00592127 |
| ENSG00000188603 | 16  | 28477983  | 28506896  | 53    | 21     | 409710 | 4.4472 | 4.35E-06   | CLN3     | 0.00452341 |
| ENSG00000196296 | 16  | 28889726  | 28915830  | 73    | 26     | 409710 | 4.6695 | 1.51E-06   | ATP2A1   | 0.00256862 |
| ENSG00000196502 | 16  | 28616903  | 28634946  | 76    | 11     | 409710 | 4.4498 | 4.30E-06   | SULT1A1  | 0.00452341 |
| ENSG00000197165 | 16  | 28603264  | 28608430  | 33    | 15     | 409710 | 3.7508 | 8.81E-05   | SULT1A2  | 0.02882637 |
| ENSG00000197272 | 16  | 28510683  | 28523372  | 34    | 12     | 409710 | 4.3    | 8.54E-06   | IL27     | 0.00592127 |
| ENSG00000261832 | 16  | 28477974  | 28503333  | 45    | 19     | 409710 | 4.4027 | 5.35E-06   | CLN3     | 0.00500379 |
| ENSG00000073605 | 17  | 38060848  | 38076107  | 60    | 13     | 409710 | 3.8827 | 5.16E-05   | GSDMB    | 0.01933457 |
| ENSG00000161395 | 17  | 37827375  | 37853050  | 84    | 12     | 409710 | 3.9212 | 4.41E-05   | PGAP3    | 0.01718156 |
| ENSG00000186075 | 17  | 38024417  | 38034149  | 38    | 7      | 409710 | 3.6645 | 0.00012392 | ZBPB2    | 0.03802516 |
| ENSG00000198740 | 17  | 47366568  | 47439835  | 195   | 33     | 409710 | 4.0806 | 2.25E-05   | ZNF652   | 0.01050969 |
| ENSG00000101115 | 20  | 50400581  | 50419059  | 88    | 24     | 409710 | 4.4097 | 5.18E-06   | SALL4    | 0.00500379 |
| ENSG00000100285 | 22  | 29876219  | 29887379  | 34    | 14     | 409710 | 3.5933 | 0.00016324 | NEFH     | 0.04850042 |
| ENSG00000164266 | 5   | 147204131 | 147211349 | 23    | 10     | 365516 | 5.2613 | 7.15E-08   | SPINK1   | 0.00133901 |
| ENSG00000169223 | 5   | 176758563 | 176778853 | 53    | 20     | 365516 | 4.1543 | 1.63E-05   | LMAN2    | 0.03392741 |
| ENSG00000171044 | 8   | 10753555  | 11058875  | 1321  | 66     | 365516 | 4.1637 | 1.57E-05   | XKR6     | 0.03392741 |
| ENSG00000184608 | 8   | 11225911  | 11296167  | 382   | 56     | 365516 | 4.2619 | 1.01E-05   | C8orf12  | 0.03161782 |
| ENSG00000136378 | 15  | 79051545  | 79103773  | 265   | 32     | 365516 | 4.1959 | 1.36E-05   | ADAMTS7  | 0.03392741 |
| ENSG00000102882 | 16  | 30125426  | 30134827  | 30    | 18     | 365516 | 4.87   | 5.58E-07   | MAPK3    | 0.00522148 |
| ENSG00000125107 | 16  | 58553855  | 58663790  | 395   | 31     | 365516 | 4.4    | 5.41E-06   | CNOT1    | 0.02407846 |
| ENSG00000149930 | 16  | 29984962  | 30003582  | 32    | 10     | 365516 | 4.0378 | 2.70E-05   | TAOK2    | 0.04590504 |
| ENSG00000174939 | 16  | 29911696  | 29931185  | 43    | 19     | 365516 | 4.1149 | 1.94E-05   | ASPHD1   | 0.03624928 |
| ENSG00000174943 | 16  | 29916333  | 29938356  | 59    | 19     | 365516 | 4.3624 | 6.43E-06   | KCTD13   | 0.02407846 |
| ENSG00000101204 | 20  | 61975420  | 62009753  | 205   | 51     | 365516 | 4.4746 | 3.83E-06   | CHRNA4   | 0.02388167 |
| ENSG00000070831 | 1   | 22379120  | 22419437  | 129   | 32     | 363000 | 3.8963 | 4.88E-05   | CDC42    | 0.01693112 |
| ENSG00000116329 | 1   | 29138654  | 29190208  | 212   | 41     | 363000 | 3.7267 | 9.70E-05   | OPRD1    | 0.02604797 |
| ENSG00000130940 | 1   | 10696661  | 10856707  | 653   | 137    | 363000 | 3.7537 | 8.71E-05   | CASZ1    | 0.0250922  |

| GENE            | CHR | START     | STOP      | NSNPS | NPARAM | N      | ZSTAT  | P          | SYMBOL     | FDR        |
|-----------------|-----|-----------|-----------|-------|--------|--------|--------|------------|------------|------------|
| ENSG00000162552 | 1   | 22443798  | 22470462  | 112   | 26     | 363000 | 4.6473 | 1.68E-06   | WNT4       | 0.00095365 |
| ENSG00000213047 | 1   | 197473878 | 197744826 | 570   | 61     | 363000 | 3.7296 | 9.59E-05   | DENND1B    | 0.02604797 |
| ENSG00000235750 | 1   | 175126123 | 175162135 | 136   | 24     | 363000 | 4.8362 | 6.62E-07   | KIAA0040   | 0.00049538 |
| ENSG00000075884 | 2   | 143848931 | 144525921 | 2207  | 168    | 363000 | 8.5098 | 8.71E-18   | ARHGAP15   | 1.63E-13   |
| ENSG00000115159 | 2   | 157291802 | 157470247 | 516   | 37     | 363000 | 3.7292 | 9.60E-05   | GPD2       | 0.02604797 |
| ENSG00000269383 | 2   | 100986705 | 100987007 | 3     | 2      | 363000 | 3.6591 | 0.00012654 | AC012493.2 | 0.03076072 |
| ENSG00000138271 | 3   | 151011891 | 151034740 | 96    | 22     | 363000 | 3.8351 | 6.28E-05   | GPR87      | 0.01991056 |
| ENSG00000144893 | 3   | 150803484 | 151154860 | 1327  | 82     | 363000 | 4.4242 | 4.84E-06   | MED12L     | 0.00226521 |
| ENSG00000163960 | 3   | 196074533 | 196159345 | 215   | 58     | 363000 | 3.7069 | 0.00010491 | UBXN7      | 0.02727369 |
| ENSG00000168237 | 3   | 52321105  | 52329272  | 21    | 7      | 363000 | 3.8038 | 7.12E-05   | GLYCTK     | 0.02116501 |
| ENSG00000169313 | 3   | 151055168 | 151102600 | 191   | 41     | 363000 | 3.9312 | 4.23E-05   | P2RY12     | 0.01540421 |
| ENSG00000174944 | 3   | 150929905 | 150996255 | 242   | 43     | 363000 | 4.8517 | 6.12E-07   | P2RY14     | 0.00047731 |
| ENSG00000071205 | 4   | 148653214 | 148993931 | 1119  | 101    | 363000 | 3.5282 | 0.00020922 | ARHGAP10   | 0.04553698 |
| ENSG00000138696 | 4   | 95679119  | 96079599  | 1668  | 91     | 363000 | 3.7217 | 9.90E-05   | BMPR1B     | 0.02608894 |
| ENSG00000196526 | 4   | 7760441   | 7941653   | 1044  | 64     | 363000 | 4.7089 | 1.25E-06   | AFAP1      | 0.00072836 |
| ENSG00000064652 | 5   | 122179134 | 122365049 | 794   | 37     | 363000 | 5.8124 | 3.08E-09   | SNX24      | 5.24E-06   |
| ENSG00000072682 | 5   | 131527531 | 131631008 | 394   | 45     | 363000 | 3.6976 | 0.00010882 | P4HA2      | 0.02779117 |
| ENSG00000135074 | 5   | 156822542 | 157002783 | 781   | 49     | 363000 | 4.0139 | 2.99E-05   | ADAM19     | 0.01215124 |
| ENSG00000168938 | 5   | 122358945 | 122372436 | 60    | 22     | 363000 | 3.8596 | 5.68E-05   | PPIC       | 0.01832589 |
| ENSG00000197536 | 5   | 131746328 | 131811736 | 249   | 38     | 363000 | 4.3056 | 8.33E-06   | C5orf56    | 0.00371116 |
| ENSG00000164465 | 6   | 117774980 | 117891021 | 503   | 47     | 363000 | 3.6206 | 0.00014698 | DCBLD1     | 0.03438965 |
| ENSG00000049540 | 7   | 73442119  | 73484237  | 128   | 46     | 363000 | 6.1094 | 5.00E-10   | ELN        | 1.17E-06   |
| ENSG00000106683 | 7   | 73497263  | 73536855  | 140   | 45     | 363000 | 4.7091 | 1.24E-06   | LIMK1      | 0.00072836 |
| ENSG00000176349 | 7   | 1878222   | 1889567   | 68    | 15     | 363000 | 3.7256 | 9.74E-05   | AC110781.3 | 0.02604797 |
| ENSG00000171056 | 8   | 10581278  | 10697357  | 630   | 35     | 363000 | 3.5044 | 0.00022883 | SOX7       | 0.0485974  |
| ENSG00000119487 | 9   | 128199672 | 128469513 | 842   | 50     | 363000 | 5.0216 | 2.56E-07   | MAPKAP1    | 0.00023976 |
| ENSG00000177984 | 9   | 139654086 | 139660707 | 30    | 8      | 363000 | 3.8686 | 5.47E-05   | LCN15      | 0.0182935  |
| ENSG00000244187 | 9   | 139685807 | 139687709 | 12    | 7      | 363000 | 3.9824 | 3.41E-05   | TMEM141    | 0.01330421 |
| ENSG00000065621 | 10  | 106028631 | 106064703 | 100   | 32     | 363000 | 4.1623 | 1.58E-05   | GSTO2      | 0.00685601 |
| ENSG00000078403 | 10  | 21823094  | 22032559  | 381   | 90     | 363000 | 3.6273 | 0.00014319 | MLLT10     | 0.03392697 |
| ENSG00000148798 | 10  | 105036920 | 105050108 | 40    | 12     | 363000 | 3.6675 | 0.00012248 | INA        | 0.03016553 |
| ENSG00000148834 | 10  | 105995114 | 106027217 | 91    | 26     | 363000 | 4.3205 | 7.78E-06   | GSTO1      | 0.00355313 |
| ENSG00000148835 | 10  | 105127724 | 105148822 | 46    | 21     | 363000 | 3.9944 | 3.24E-05   | TAF5       | 0.01291343 |
| ENSG00000148841 | 10  | 106071894 | 106098162 | 87    | 27     | 363000 | 5.2469 | 7.73E-08   | ITPRIP     | 8.51E-05   |
| ENSG00000156374 | 10  | 105062553 | 105110891 | 113   | 40     | 363000 | 4.0266 | 2.83E-05   | PCGF6      | 0.01177029 |
| ENSG00000173915 | 10  | 105148798 | 105156223 | 19    | 11     | 363000 | 3.9741 | 3.53E-05   | USMG5      | 0.01349339 |

| GENE            | CHR | START     | STOP      | NSNPS | NPARAM | N      | ZSTAT  | P          | SYMBOL   | FDR        |
|-----------------|-----|-----------|-----------|-------|--------|--------|--------|------------|----------|------------|
| ENSG00000180592 | 10  | 21802407  | 21814611  | 17    | 11     | 363000 | 3.8064 | 7.05E-05   | SKIDA1   | 0.02116501 |
| ENSG00000197748 | 10  | 105889646 | 105992120 | 333   | 42     | 363000 | 3.6819 | 0.00011577 | WDR96    | 0.0288931  |
| ENSG00000149295 | 11  | 113280318 | 113346413 | 231   | 47     | 363000 | 3.7281 | 9.65E-05   | DRD2     | 0.02604797 |
| ENSG00000170209 | 11  | 113258513 | 113271140 | 35    | 10     | 363000 | 3.6952 | 0.00010987 | ANKK1    | 0.02779117 |
| ENSG00000100599 | 14  | 92980118  | 93155339  | 750   | 123    | 363000 | 3.9526 | 3.87E-05   | RIN3     | 0.01447051 |
| ENSG00000080644 | 15  | 78885394  | 78913637  | 116   | 22     | 363000 | 4.9919 | 2.99E-07   | CHRNA3   | 0.00026651 |
| ENSG00000103591 | 15  | 67493371  | 67547533  | 153   | 27     | 363000 | 4.748  | 1.03E-06   | AAGAB    | 0.00068655 |
| ENSG00000103599 | 15  | 67547138  | 67794598  | 609   | 59     | 363000 | 4.7192 | 1.18E-06   | IQCH     | 0.00072836 |
| ENSG00000117906 | 15  | 77223960  | 77242601  | 43    | 20     | 363000 | 4.4937 | 3.50E-06   | RCN2     | 0.00168006 |
| ENSG00000117971 | 15  | 78916461  | 79020096  | 347   | 50     | 363000 | 5.0953 | 1.74E-07   | CHRN4    | 0.00017519 |
| ENSG00000136381 | 15  | 78729773  | 78793798  | 165   | 30     | 363000 | 4.6009 | 2.10E-06   | IREB2    | 0.00106394 |
| ENSG00000140374 | 15  | 76507696  | 76603813  | 277   | 27     | 363000 | 5.5338 | 1.57E-08   | ETF1A    | 2.44E-05   |
| ENSG00000140386 | 15  | 76640526  | 77197785  | 1510  | 49     | 363000 | 6.113  | 4.89E-10   | SCAPER   | 1.17E-06   |
| ENSG00000156218 | 15  | 84322838  | 84708594  | 1296  | 77     | 363000 | 3.5523 | 0.00019097 | ADAMTSL3 | 0.04306719 |
| ENSG00000159556 | 15  | 76629065  | 76634817  | 14    | 6      | 363000 | 4.6076 | 2.04E-06   | ISL2     | 0.00106394 |
| ENSG00000169684 | 15  | 78857862  | 78887611  | 87    | 22     | 363000 | 5.3852 | 3.62E-08   | CHRNA5   | 4.23E-05   |
| ENSG00000169758 | 15  | 76352178  | 76521462  | 566   | 79     | 363000 | 6.2853 | 1.64E-10   | C15orf27 | 7.65E-07   |
| ENSG00000188266 | 15  | 78799906  | 78829714  | 108   | 16     | 363000 | 3.7849 | 7.69E-05   | HYKK     | 0.02248821 |
| ENSG00000052344 | 16  | 31142756  | 31147083  | 8     | 5      | 363000 | 4.7684 | 9.29E-07   | PRSS8    | 0.00064377 |
| ENSG00000099364 | 16  | 30934376  | 30960104  | 45    | 14     | 363000 | 3.8692 | 5.46E-05   | FBXL19   | 0.0182935  |
| ENSG00000099365 | 16  | 31000577  | 31021949  | 42    | 13     | 363000 | 5.5002 | 1.90E-08   | STX1B    | 2.73E-05   |
| ENSG00000099381 | 16  | 30968615  | 30996437  | 66    | 25     | 363000 | 3.8195 | 6.69E-05   | SETD1A   | 0.02051523 |
| ENSG00000099385 | 16  | 30844947  | 30906281  | 109   | 33     | 363000 | 3.533  | 0.00020544 | BCL7C    | 0.0452403  |
| ENSG00000102996 | 16  | 58059470  | 58080805  | 65    | 26     | 363000 | 4.932  | 4.07E-07   | MMP15    | 0.00033123 |
| ENSG00000103005 | 16  | 58033450  | 58055522  | 62    | 19     | 363000 | 3.9263 | 4.31E-05   | USB1     | 0.01540421 |
| ENSG00000103264 | 16  | 87360593  | 87425748  | 272   | 52     | 363000 | 3.8634 | 5.59E-05   | FBXO31   | 0.01832589 |
| ENSG00000103496 | 16  | 31044210  | 31054296  | 21    | 8      | 363000 | 5.8333 | 2.72E-09   | STX4     | 5.09E-06   |
| ENSG00000103507 | 16  | 31117428  | 31124110  | 16    | 9      | 363000 | 6.5834 | 2.30E-11   | BCKDK    | 2.15E-07   |
| ENSG00000103510 | 16  | 31127075  | 31142714  | 39    | 15     | 363000 | 6.4013 | 7.70E-11   | KAT8     | 4.81E-07   |
| ENSG00000140941 | 16  | 87417601  | 87438385  | 87    | 27     | 363000 | 3.6503 | 0.00013098 | MAP1LC3B | 0.03143184 |
| ENSG00000141101 | 16  | 69775770  | 69788843  | 45    | 16     | 363000 | 4.632  | 1.81E-06   | NOB1     | 0.0009969  |
| ENSG00000151006 | 16  | 31094746  | 31100949  | 20    | 9      | 363000 | 4.7105 | 1.24E-06   | PRSS53   | 0.00072836 |
| ENSG00000153815 | 16  | 81478775  | 81745367  | 1375  | 180    | 363000 | 3.5336 | 0.000205   | CMIP     | 0.0452403  |
| ENSG00000162086 | 16  | 3355406   | 3368852   | 38    | 11     | 363000 | 3.5738 | 0.00017591 | ZNF75A   | 0.04015468 |
| ENSG00000166188 | 16  | 58028572  | 58034357  | 17    | 7      | 363000 | 4.0977 | 2.09E-05   | ZNF319   | 0.00887616 |
| ENSG00000167394 | 16  | 31072164  | 31085641  | 37    | 13     | 363000 | 5.4427 | 2.62E-08   | ZNF668   | 3.51E-05   |

| GENE            | CHR | START     | STOP      | NSNPS | NPARAM | N      | ZSTAT  | P          | SYMBOL        | FDR        |
|-----------------|-----|-----------|-----------|-------|--------|--------|--------|------------|---------------|------------|
| ENSG00000167395 | 16  | 31085743  | 31095517  | 25    | 13     | 363000 | 6.2364 | 2.24E-10   | ZNF646        | 8.38E-07   |
| ENSG00000167397 | 16  | 31102163  | 31107301  | 8     | 4      | 363000 | 6.1379 | 4.18E-10   | VKORC1        | 1.17E-06   |
| ENSG00000169900 | 16  | 31227283  | 31228680  | 1     | 1      | 363000 | 3.9236 | 4.36E-05   | PYDC1         | 0.01540421 |
| ENSG00000178226 | 16  | 31150246  | 31161415  | 22    | 13     | 363000 | 4.6026 | 2.09E-06   | PRSS36        | 0.00106394 |
| ENSG00000181019 | 16  | 69740899  | 69760854  | 69    | 24     | 363000 | 4.7745 | 9.01E-07   | NQO1          | 0.00064377 |
| ENSG00000198373 | 16  | 69796209  | 69975644  | 700   | 46     | 363000 | 4.5929 | 2.19E-06   | WWP2          | 0.00107648 |
| ENSG00000255439 | 16  | 31094760  | 31106277  | 28    | 12     | 363000 | 5.39   | 3.52E-08   | RP11-196G11.1 | 4.23E-05   |
| ENSG00000172466 | 18  | 32912176  | 32925446  | 36    | 14     | 363000 | 3.5018 | 0.00023107 | ZNF24         | 0.0485974  |
| ENSG00000187323 | 18  | 49866542  | 51057784  | 5902  | 172    | 363000 | 4.9695 | 3.36E-07   | DCC           | 0.00028549 |
| ENSG00000130203 | 19  | 45409011  | 45412650  | 9     | 5      | 363000 | 5.9349 | 1.47E-09   | APOE          | 3.06E-06   |
| ENSG00000130208 | 19  | 45417504  | 45422606  | 17    | 9      | 363000 | 5.0913 | 1.78E-07   | APOC1         | 0.00017519 |
| ENSG00000131941 | 19  | 33469499  | 33555794  | 362   | 50     | 363000 | 3.8289 | 6.44E-05   | RHPN2         | 0.02007755 |
| ENSG00000267748 | 19  | 38779791  | 38795550  | 64    | 19     | 363000 | 3.5101 | 0.00022393 | CTB-102L5.4   | 0.04817841 |
| ENSG00000130584 | 20  | 62375019  | 62462597  | 434   | 39     | 363000 | 3.6047 | 0.00015626 | ZBTB46        | 0.03610956 |
| ENSG00000143226 | 1   | 161475220 | 161493803 | 77    | 22     | 378923 | 3.8177 | 6.74E-05   | FCGR2A        | 0.04759155 |
| ENSG00000152061 | 1   | 174128548 | 174964445 | 2461  | 46     | 378923 | 3.9433 | 4.02E-05   | RABGAP1L      | 0.0395866  |
| ENSG00000162552 | 1   | 22443798  | 22470462  | 112   | 26     | 378923 | 3.9779 | 3.48E-05   | WNT4          | 0.0395866  |
| ENSG00000172995 | 3   | 35680437  | 35835988  | 474   | 64     | 378923 | 3.9543 | 3.84E-05   | ARPP21        | 0.0395866  |
| ENSG00000196782 | 4   | 140637907 | 141075338 | 1454  | 194    | 378923 | 5.6565 | 7.72E-09   | MAML3         | 6.11E-05   |
| ENSG00000188107 | 6   | 64429876  | 66417118  | 8089  | 222    | 378923 | 5.0391 | 2.34E-07   | EYS           | 0.0007296  |
| ENSG00000171044 | 8   | 10753555  | 11058875  | 1321  | 66     | 378923 | 5.5656 | 1.31E-08   | XKR6          | 6.11E-05   |
| ENSG00000171056 | 8   | 10581278  | 10697357  | 630   | 35     | 378923 | 5.6442 | 8.30E-09   | SOX7          | 6.11E-05   |
| ENSG00000184608 | 8   | 11225911  | 11296167  | 382   | 56     | 378923 | 4.5837 | 2.28E-06   | C8orf12       | 0.00610688 |
| ENSG00000215346 | 8   | 10983980  | 10987745  | 17    | 6      | 378923 | 4.1324 | 1.80E-05   | AF131215.5    | 0.03054607 |
| ENSG00000254093 | 8   | 10622473  | 10697394  | 448   | 36     | 378923 | 5.485  | 2.07E-08   | PINX1         | 7.74E-05   |
| ENSG00000258724 | 8   | 10582909  | 10697357  | 620   | 34     | 378923 | 5.5705 | 1.27E-08   | SOX7          | 6.11E-05   |
| ENSG00000173611 | 9   | 127704887 | 127905785 | 534   | 56     | 378923 | 4.0498 | 2.56E-05   | SCAI          | 0.03768221 |
| ENSG00000149295 | 11  | 113280318 | 113346413 | 231   | 47     | 378923 | 4.2538 | 1.05E-05   | DRD2          | 0.02223906 |
| ENSG00000176697 | 11  | 27676440  | 27743605  | 173   | 39     | 378923 | 3.8468 | 5.98E-05   | BDNF          | 0.04479143 |
| ENSG00000125954 | 14  | 65381203  | 65528521  | 577   | 72     | 378923 | 3.8587 | 5.70E-05   | CHURC1-FNTB   | 0.04444901 |
| ENSG00000257365 | 14  | 65381203  | 65529368  | 579   | 74     | 378923 | 3.9093 | 4.63E-05   | FNTB          | 0.04125002 |
| ENSG00000117971 | 15  | 78916461  | 79020096  | 347   | 50     | 378923 | 4.1514 | 1.65E-05   | CHRNA4        | 0.03054607 |
| ENSG00000136381 | 15  | 78729773  | 78793798  | 165   | 30     | 378923 | 3.9833 | 3.40E-05   | IREB2         | 0.0395866  |
| ENSG00000153774 | 16  | 75327596  | 75467383  | 668   | 35     | 378923 | 3.813  | 6.86E-05   | CFDP1         | 0.04759155 |
| ENSG00000261717 | 16  | 75446582  | 75498604  | 269   | 24     | 378923 | 4.0259 | 2.84E-05   | RP11-77K12.1  | 0.0379454  |
| ENSG00000141452 | 18  | 21083473  | 21111746  | 75    | 25     | 378923 | 3.8618 | 5.63E-05   | C18orf8       | 0.04444901 |

| GENE            | CHR | START     | STOP      | NSNPS | NPARAM | N      | ZSTAT  | P        | SYMBOL        | FDR        |
|-----------------|-----|-----------|-----------|-------|--------|--------|--------|----------|---------------|------------|
| ENSG00000141458 | 18  | 21086148  | 21166862  | 237   | 52     | 378923 | 3.8832 | 5.16E-05 | NPC1          | 0.04386308 |
| ENSG00000268797 | 19  | 41307202  | 41404187  | 435   | 71     | 378923 | 4.2499 | 1.07E-05 | CTC-490E21.12 | 0.02223906 |
| ENSG00000101204 | 20  | 61975420  | 62009753  | 205   | 51     | 378923 | 4.0449 | 2.62E-05 | CHRNA4        | 0.03768221 |
| ENSG00000197114 | 20  | 62338817  | 62367494  | 105   | 19     | 378923 | 3.9513 | 3.89E-05 | ZGPAT         | 0.0395866  |
| ENSG00000273154 | 20  | 62340216  | 62370456  | 112   | 19     | 378923 | 3.9134 | 4.55E-05 | RP4-583P15.15 | 0.04125002 |
| ENSG00000197536 | 5   | 131746328 | 131811736 | 249   | 38     | 359744 | 4.3663 | 6.32E-06 | C5orf56       | 0.02365506 |
| ENSG00000065621 | 10  | 106028631 | 106064703 | 100   | 32     | 359744 | 4.5665 | 2.48E-06 | GSTO2         | 0.01547417 |
| ENSG00000148834 | 10  | 105995114 | 106027217 | 91    | 26     | 359744 | 4.097  | 2.09E-05 | GSTO1         | 0.04351519 |
| ENSG00000148841 | 10  | 106071894 | 106098162 | 87    | 27     | 359744 | 5.4373 | 2.71E-08 | ITPRIP        | 0.00025317 |
| ENSG00000080644 | 15  | 78885394  | 78913637  | 116   | 22     | 359744 | 4.0541 | 2.52E-05 | CHRNA3        | 0.04709262 |
| ENSG00000117971 | 15  | 78916461  | 79020096  | 347   | 50     | 359744 | 5.6527 | 7.90E-09 | CHRN4         | 0.00014779 |
| ENSG00000136381 | 15  | 78729773  | 78793798  | 165   | 30     | 359744 | 4.2036 | 1.31E-05 | IREB2         | 0.03098531 |
| ENSG00000169684 | 15  | 78857862  | 78887611  | 87    | 22     | 359744 | 4.2589 | 1.03E-05 | CHRNA5        | 0.03098531 |
| ENSG00000073605 | 17  | 38060848  | 38076107  | 60    | 13     | 359744 | 4.4408 | 4.48E-06 | GSDMB         | 0.0209665  |
| ENSG00000161395 | 17  | 37827375  | 37853050  | 84    | 12     | 359744 | 4.2018 | 1.32E-05 | PGAP3         | 0.03098531 |
| ENSG00000104408 | 8   | 109213445 | 109447562 | 969   | 46     | 356523 | 4.2502 | 1.07E-05 | EIF3E         | 0.02499087 |
| ENSG00000148841 | 10  | 106071894 | 106098162 | 87    | 27     | 356523 | 4.516  | 3.15E-06 | ITPRIP        | 0.01404823 |
| ENSG00000125954 | 14  | 65381203  | 65528521  | 577   | 72     | 356523 | 4.2759 | 9.52E-06 | CHURC1-FNTB   | 0.02499087 |
| ENSG00000257365 | 14  | 65381203  | 65529368  | 579   | 74     | 356523 | 4.3317 | 7.40E-06 | FNTB          | 0.02307461 |
| ENSG00000080644 | 15  | 78885394  | 78913637  | 116   | 22     | 356523 | 5.192  | 1.04E-07 | CHRNA3        | 0.00064914 |
| ENSG00000117971 | 15  | 78916461  | 79020096  | 347   | 50     | 356523 | 5.8118 | 3.09E-09 | CHRN4         | 5.46E-05   |
| ENSG00000136381 | 15  | 78729773  | 78793798  | 165   | 30     | 356523 | 4.4788 | 3.75E-06 | IREB2         | 0.01404823 |
| ENSG00000169684 | 15  | 78857862  | 78887611  | 87    | 22     | 356523 | 5.7046 | 5.83E-09 | CHRNA5        | 5.46E-05   |
| ENSG00000152061 | 1   | 174128548 | 174964445 | 2461  | 46     | 339710 | 3.9724 | 3.56E-05 | RABGAP1L      | 0.03857156 |
| ENSG00000115159 | 2   | 157291802 | 157470247 | 516   | 37     | 339710 | 3.881  | 5.20E-05 | GPD2          | 0.04015083 |
| ENSG00000145029 | 3   | 49460379  | 49466759  | 8     | 5      | 339710 | 4.7311 | 1.12E-06 | NICN1         | 0.00298579 |
| ENSG00000164061 | 3   | 49591922  | 49708978  | 248   | 45     | 339710 | 4.5966 | 2.15E-06 | BSN           | 0.00476248 |
| ENSG00000164068 | 3   | 49726932  | 49758962  | 76    | 24     | 339710 | 3.924  | 4.36E-05 | RNF123        | 0.03881846 |
| ENSG00000172037 | 3   | 49158547  | 49170551  | 17    | 12     | 339710 | 4.8393 | 6.52E-07 | LAMB2         | 0.00203284 |
| ENSG00000173531 | 3   | 49721380  | 49726934  | 7     | 4      | 339710 | 4.2186 | 1.23E-05 | MST1          | 0.01769715 |
| ENSG00000176095 | 3   | 49761727  | 49823975  | 133   | 27     | 339710 | 4.5072 | 3.29E-06 | IP6K1         | 0.00614905 |
| ENSG00000182179 | 3   | 49842640  | 49851379  | 21    | 11     | 339710 | 3.9625 | 3.71E-05 | UBA7          | 0.03857156 |
| ENSG00000183763 | 3   | 49866034  | 49894007  | 56    | 18     | 339710 | 4.459  | 4.12E-06 | TRAIIP        | 0.00700428 |
| ENSG00000187492 | 3   | 49828165  | 49837268  | 20    | 11     | 339710 | 4.1235 | 1.87E-05 | CDHR4         | 0.02328769 |
| ENSG00000233276 | 3   | 49394609  | 49396033  | 3     | 1      | 339710 | 3.9352 | 4.16E-05 | GPX1          | 0.03881846 |
| ENSG00000109670 | 4   | 153242410 | 153457253 | 668   | 37     | 339710 | 3.8641 | 5.57E-05 | FBXW7         | 0.04015083 |

| GENE            | CHR | START     | STOP      | NSNPS | NPARAM | N      | ZSTAT  | P        | SYMBOL        | FDR        |
|-----------------|-----|-----------|-----------|-------|--------|--------|--------|----------|---------------|------------|
| ENSG00000169194 | 5   | 131991955 | 131996802 | 11    | 4      | 339710 | 4.5832 | 2.29E-06 | IL13          | 0.00476248 |
| ENSG00000104412 | 8   | 109455830 | 109499145 | 149   | 19     | 339710 | 3.9392 | 4.09E-05 | EMC2          | 0.03881846 |
| ENSG00000171044 | 8   | 10753555  | 11058875  | 1321  | 66     | 339710 | 3.7838 | 7.72E-05 | XKR6          | 0.04998545 |
| ENSG00000149084 | 11  | 43577986  | 43878167  | 1066  | 53     | 339710 | 3.9063 | 4.69E-05 | HSD17B12      | 0.03987615 |
| ENSG00000176697 | 11  | 27676440  | 27743605  | 173   | 39     | 339710 | 3.9802 | 3.44E-05 | BDNF          | 0.03857156 |
| ENSG00000080644 | 15  | 78885394  | 78913637  | 116   | 22     | 339710 | 6.8853 | 2.88E-12 | CHRNA3        | 2.70E-08   |
| ENSG00000117971 | 15  | 78916461  | 79020096  | 347   | 50     | 339710 | 5.4055 | 3.23E-08 | CHRNA4        | 0.00014885 |
| ENSG00000136378 | 15  | 79051545  | 79103773  | 265   | 32     | 339710 | 5.3682 | 3.98E-08 | ADAMTS7       | 0.00014885 |
| ENSG00000136381 | 15  | 78729773  | 78793798  | 165   | 30     | 339710 | 6.4352 | 6.17E-11 | IREB2         | 3.85E-07   |
| ENSG00000169684 | 15  | 78857862  | 78887611  | 87    | 22     | 339710 | 7.5269 | 2.60E-14 | CHRNA5        | 4.86E-10   |
| ENSG00000185787 | 15  | 79102829  | 79190475  | 398   | 35     | 339710 | 4.161  | 1.58E-05 | MORF4L1       | 0.02117808 |
| ENSG00000188266 | 15  | 78799906  | 78829714  | 108   | 16     | 339710 | 4.2996 | 8.56E-06 | HYKK          | 0.01334515 |
| ENSG00000261717 | 16  | 75446582  | 75498604  | 269   | 24     | 339710 | 3.8711 | 5.42E-05 | RP11-77K12.1  | 0.04015083 |
| ENSG00000130520 | 19  | 18417040  | 18434084  | 57    | 21     | 339710 | 3.864  | 5.58E-05 | LSM4          | 0.04015083 |
| ENSG00000197114 | 20  | 62338817  | 62367494  | 105   | 19     | 339710 | 3.8271 | 6.48E-05 | ZGPAT         | 0.04494261 |
| ENSG00000273154 | 20  | 62340216  | 62370456  | 112   | 19     | 339710 | 3.7831 | 7.74E-05 | RP4-583P15.15 | 0.04998545 |

**Supplementary Table S5. MAGMA combined with POPS screening (POPS score>1)**

| <b>ENSGID</b>   | <b>PoPS_Score</b> | <b>Y</b> | <b>Y_proj</b> | <b>project_out_covariates_gene</b> | <b>feature_selection_gene</b> | <b>training_gene</b> |
|-----------------|-------------------|----------|---------------|------------------------------------|-------------------------------|----------------------|
| ENSG00000130203 | 2.45569910587     | 4.7022   | 4.6951634     | TRUE                               | TRUE                          | TRUE                 |
| ENSG00000149295 | 1.18847465916     | 4.0434   | 4.01621416    | TRUE                               | TRUE                          | TRUE                 |
| ENSG00000162670 | 1.48949952811     | 4.3538   | 4.26905274    | TRUE                               | TRUE                          | TRUE                 |
| ENSG00000164266 | 2.24372038387     | 5.0401   | 5.0416022     | TRUE                               | TRUE                          | TRUE                 |
| ENSG00000120088 | 1.0719853148      | 4.027    | 3.71616227    | TRUE                               | TRUE                          | TRUE                 |
| ENSG00000178381 | 1.32750845865     | 4.5337   | 4.53470089    | TRUE                               | TRUE                          | TRUE                 |
| ENSG00000184588 | 1.4908405275      | 4.432    | 4.42957397    | TRUE                               | TRUE                          | TRUE                 |
| ENSG00000164266 | 2.15517157186     | 5.2613   | 5.27017696    | TRUE                               | TRUE                          | TRUE                 |
| ENSG00000049540 | 1.40717913543     | 6.1094   | 6.15855356    | TRUE                               | TRUE                          | TRUE                 |
| ENSG00000075884 | 1.54825811631     | 8.5098   | 8.55116595    | TRUE                               | TRUE                          | TRUE                 |
| ENSG00000130203 | 2.32512088861     | 5.9349   | 5.9052197     | TRUE                               | TRUE                          | TRUE                 |
| ENSG00000130208 | 1.921342841       | 5.0913   | 5.03586367    | TRUE                               | TRUE                          | TRUE                 |
| ENSG00000172995 | 1.68321204249     | 3.9543   | 3.9128336     | TRUE                               | TRUE                          | TRUE                 |
| ENSG00000196782 | 1.10996944475     | 5.6565   | 5.71524228    | TRUE                               | TRUE                          | TRUE                 |
| ENSG00000065621 | 1.38925231608     | 4.5665   | 4.59345964    | TRUE                               | TRUE                          | TRUE                 |

Supplementary Table S6. Gene ontology enrichment

| ONTOLOGY | ID         | Description                                                                                       | GeneRatio | BgRatio   | pvalue         | p.adjust       | qvalue         | geneID                       | Count |
|----------|------------|---------------------------------------------------------------------------------------------------|-----------|-----------|----------------|----------------|----------------|------------------------------|-------|
| BP       | GO:1901385 | regulation of voltage-gated calcium channel activity                                              | 3/13/2024 | 49/18903  | 4.60E-06       | 0.002122955755 | 0.000832846578 | DRD2/CRHR1/PDE4B             | 3     |
| BP       | GO:0034382 | chylomicron remnant clearance                                                                     | 2/13/2024 | 6/18903   | 6.54E-06       | 0.002122955755 | 0.000832846578 | APOE/APOC1                   | 2     |
| BP       | GO:0071830 | triglyceride-rich lipoprotein particle clearance                                                  | 2/13/2024 | 6/18903   | 6.54E-06       | 0.002122955755 | 0.000832846578 | APOE/APOC1                   | 2     |
| BP       | GO:0034447 | very-low-density lipoprotein particle clearance                                                   | 2/13/2024 | 7/18903   | 9.15E-06       | 0.002168125478 | 0.000850566896 | APOE/APOC1                   | 2     |
| BP       | GO:0051051 | negative regulation of transport                                                                  | 5/13/2024 | 479/18903 | 1.11E-05       | 0.002168125478 | 0.000850566896 | APOE/DRD2/SPINK1/CRHR1/APOC5 | 5     |
| BP       | GO:0048149 | behavioral response to ethanol                                                                    | 2/13/2024 | 9/18903   | 1.57E-05       | 0.002228155493 | 0.000874116982 | DRD2/CRHR1                   | 2     |
| BP       | GO:0051926 | negative regulation of calcium ion transport                                                      | 3/13/2024 | 74/18903  | 1.60E-05       | 0.002228155493 | 0.000874116982 | DRD2/SPINK1/CRHR1            | 3     |
| BP       | GO:0051924 | regulation of calcium ion transport                                                               | 4/13/2024 | 268/18903 | 2.55E-05       | 0.003109665082 | 0.001219937777 | DRD2/SPINK1/CRHR1/PDE4B      | 4     |
| BP       | GO:0033700 | phospholipid efflux                                                                               | 2/13/2024 | 13/18903  | 3.39E-05       | 0.003480160966 | 0.001365285238 | APOE/APOC1                   | 2     |
| BP       | GO:0015850 | organic hydroxy compound transport                                                                | 4/13/2024 | 292/18903 | 3.57E-05       | 0.003480160966 | 0.001365285238 | APOE/DRD2/CRHR1/APOC1        | 4     |
| BP       | GO:1901019 | regulation of calcium ion transmembrane transporter activity                                      | 3/13/2024 | 102/18903 | 4.19E-05       | 0.003714090407 | 0.001457056974 | DRD2/CRHR1/PDE4B             | 3     |
| BP       | GO:0034375 | high-density lipoprotein particle remodeling                                                      | 2/13/2024 | 16/18903  | 5.21E-05       | 0.004229467916 | 0.00165924225  | APOE/APOC1                   | 2     |
| BP       | GO:0071243 | cellular response to arsenic-containing substance                                                 | 2/13/2024 | 20/18903  | 8.24E-05       | 0.005742358428 | 0.002252757062 | ZFAND2A/GSTO2                | 2     |
| BP       | GO:0045471 | response to ethanol                                                                               | 3/13/2024 | 128/18903 | 8.25E-05       | 0.005742358428 | 0.002252757062 | DRD2/SPINK1/CRHR1            | 3     |
| BP       | GO:1901386 | negative regulation of voltage-gated calcium channel activity                                     | 2/13/2024 | 24/18903  | 0.000119477962 | 0.006099506608 | 0.002392868149 | DRD2/CRHR1                   | 2     |
| BP       | GO:0034377 | plasma lipoprotein particle assembly                                                              | 2/13/2024 | 26/18903  | 0.000140580501 | 0.006099506608 | 0.002392868149 | APOE/APOC1                   | 2     |
| BP       | GO:0032368 | regulation of lipid transport                                                                     | 3/13/2024 | 155/18903 | 0.000145597833 | 0.006099506608 | 0.002392868149 | APOE/CRHR1/APOC1             | 3     |
| BP       | GO:0010959 | regulation of metal ion transport                                                                 | 4/13/2024 | 423/18903 | 0.000150577364 | 0.006099506608 | 0.002392868149 | DRD2/SPINK1/CRHR1/PDE4B      | 4     |
| BP       | GO:0007189 | adenylate cyclase-activating G protein-coupled receptor signaling pathway                         | 3/13/2024 | 157/18903 | 0.000151224253 | 0.006099506608 | 0.002392868149 | DRD2/CRHR1/PDE4B             | 3     |
| BP       | GO:0071880 | adenylate cyclase-activating adrenergic receptor signaling pathway                                | 2/13/2024 | 27/18903  | 0.000151768047 | 0.006099506608 | 0.002392868149 | DRD2/PDE4B                   | 2     |
| BP       | GO:0006869 | lipid transport                                                                                   | 4/13/2024 | 433/18903 | 0.000164747325 | 0.006099506608 | 0.002392868149 | APOE/DRD2/CRHR1/APOC1        | 4     |
| BP       | GO:0006816 | calcium ion transport                                                                             | 4/13/2024 | 440/18903 | 0.000175227125 | 0.006099506608 | 0.002392868149 | DRD2/SPINK1/CRHR1/PDE4B      | 4     |
| BP       | GO:0045936 | negative regulation of phosphate metabolic process                                                | 4/13/2024 | 440/18903 | 0.000175227125 | 0.006099506608 | 0.002392868149 | APOE/DRD2/SPINK1/APOC1       | 4     |
| BP       | GO:0007263 | nitric oxide mediated signal transduction                                                         | 2/13/2024 | 29/18903  | 0.000175413201 | 0.006099506608 | 0.002392868149 | APOE/SPINK1                  | 2     |
| BP       | GO:0065005 | protein-lipid complex assembly                                                                    | 2/13/2024 | 29/18903  | 0.000175413201 | 0.006099506608 | 0.002392868149 | APOE/APOC1                   | 2     |
| BP       | GO:0010563 | negative regulation of phosphorus metabolic process                                               | 4/13/2024 | 441/18903 | 0.000176762845 | 0.006099506608 | 0.002392868149 | APOE/DRD2/SPINK1/APOC1       | 4     |
| BP       | GO:0043271 | negative regulation of ion transport                                                              | 3/13/2024 | 167/18903 | 0.000181487212 | 0.006099506608 | 0.002392868149 | DRD2/SPINK1/CRHR1            | 3     |
| BP       | GO:0034368 | protein-lipid complex remodeling                                                                  | 2/13/2024 | 30/18903  | 0.000187869813 | 0.006099506608 | 0.002392868149 | APOE/APOC1                   | 2     |
| BP       | GO:0034369 | plasma lipoprotein particle remodeling                                                            | 2/13/2024 | 30/18903  | 0.000187869813 | 0.006099506608 | 0.002392868149 | APOE/APOC1                   | 2     |
| BP       | GO:0045940 | positive regulation of steroid metabolic process                                                  | 2/13/2024 | 30/18903  | 0.000187869813 | 0.006099506608 | 0.002392868149 | APOE/APOC1                   | 2     |
| BP       | GO:0034367 | protein-containing complex remodeling                                                             | 2/13/2024 | 32/18903  | 0.000214048626 | 0.006515105041 | 0.002555909575 | APOE/APOC1                   | 2     |
| BP       | GO:0046685 | response to arsenic-containing substance                                                          | 2/13/2024 | 32/18903  | 0.000214048626 | 0.006515105041 | 0.002555909575 | ZFAND2A/GSTO2                | 2     |
| BP       | GO:0071875 | adrenergic receptor signaling pathway                                                             | 2/13/2024 | 33/18903  | 0.000227769832 | 0.006722661109 | 0.0026373349   | DRD2/PDE4B                   | 2     |
| BP       | GO:1905952 | regulation of lipid localization                                                                  | 3/13/2024 | 185/18903 | 0.000245395816 | 0.006961082568 | 0.002730868877 | APOE/CRHR1/APOC1             | 3     |
| BP       | GO:0010876 | lipid localization                                                                                | 4/13/2024 | 483/18903 | 0.00025055449  | 0.006961082568 | 0.002730868877 | APOE/DRD2/CRHR1/APOC1        | 4     |
| BP       | GO:1903169 | regulation of calcium ion transmembrane transport                                                 | 3/13/2024 | 188/18903 | 0.000257288473 | 0.006961082568 | 0.002730868877 | DRD2/CRHR1/PDE4B             | 3     |
| BP       | GO:0007616 | long-term memory                                                                                  | 2/13/2024 | 36/18903  | 0.000271454706 | 0.007145861719 | 0.002803358699 | APOE/DRD2                    | 2     |
| BP       | GO:2001257 | regulation of cation channel activity                                                             | 3/13/2024 | 197/18903 | 0.000295194965 | 0.007566313056 | 0.002968303944 | DRD2/CRHR1/PDE4B             | 3     |
| BP       | GO:0030100 | regulation of endocytosis                                                                         | 3/13/2024 | 209/18903 | 0.000351121283 | 0.008769028969 | 0.003440135649 | APOE/DRD2/APOC1              | 3     |
| BP       | GO:0042596 | fear response                                                                                     | 2/13/2024 | 43/18903  | 0.000388029941 | 0.009448529066 | 0.003706707069 | APOE/CRHR1                   | 2     |
| BP       | GO:1901020 | negative regulation of calcium ion transmembrane transporter activity                             | 2/13/2024 | 44/18903  | 0.000406349896 | 0.0095691538   | 0.003754028779 | DRD2/CRHR1                   | 2     |
| BP       | GO:0071827 | plasma lipoprotein particle organization                                                          | 2/13/2024 | 45/18903  | 0.000425084963 | 0.0095691538   | 0.003754028779 | APOE/APOC1                   | 2     |
| BP       | GO:0030072 | peptide hormone secretion                                                                         | 3/13/2024 | 225/18903 | 0.000435758177 | 0.0095691538   | 0.003754028779 | DRD2/SPINK1/CRHR1            | 3     |
| BP       | GO:1900271 | regulation of long-term synaptic potentiation                                                     | 2/13/2024 | 46/18903  | 0.00044423465  | 0.0095691538   | 0.003754028779 | APOE/DRD2                    | 2     |
| BP       | GO:0002790 | peptide secretion                                                                                 | 3/13/2024 | 230/18903 | 0.00046466876  | 0.0095691538   | 0.003754028779 | DRD2/SPINK1/CRHR1            | 3     |
| BP       | GO:0071825 | protein-lipid complex subunit organization                                                        | 2/13/2024 | 48/18903  | 0.000483775922 | 0.0095691538   | 0.003754028779 | APOE/APOC1                   | 2     |
| BP       | GO:0046883 | regulation of hormone secretion                                                                   | 3/13/2024 | 234/18903 | 0.000488667165 | 0.0095691538   | 0.003754028779 | DRD2/SPINK1/CRHR1            | 3     |
| BP       | GO:0007188 | adenylate cyclase-modulating G protein-coupled receptor signaling pathway                         | 3/13/2024 | 248/18903 | 0.000578915413 | 0.0095691538   | 0.003754028779 | DRD2/CRHR1/PDE4B             | 3     |
| BP       | GO:0034381 | plasma lipoprotein particle clearance                                                             | 2/13/2024 | 53/18903  | 0.000589850659 | 0.0095691538   | 0.003754028779 | APOE/APOC1                   | 2     |
| BP       | GO:0009636 | response to toxic substance                                                                       | 3/13/2024 | 250/18903 | 0.000592620081 | 0.0095691538   | 0.003754028779 | APOE/DRD2/GSTO2              | 3     |
| BP       | GO:0045744 | negative regulation of G protein-coupled receptor signaling pathway                               | 2/13/2024 | 54/18903  | 0.000612299677 | 0.0095691538   | 0.003754028779 | DRD2/PDE4B                   | 2     |
| BP       | GO:0097305 | response to alcohol                                                                               | 3/13/2024 | 253/18903 | 0.000613565632 | 0.0095691538   | 0.003754028779 | DRD2/SPINK1/CRHR1            | 3     |
| BP       | GO:0015833 | peptide transport                                                                                 | 3/13/2024 | 254/18903 | 0.000620651753 | 0.0095691538   | 0.003754028779 | DRD2/SPINK1/CRHR1            | 3     |
| BP       | GO:0006898 | receptor-mediated endocytosis                                                                     | 3/13/2024 | 257/18903 | 0.000642225227 | 0.0095691538   | 0.003754028779 | APOE/DRD2/APOC1              | 3     |
| BP       | GO:0045761 | regulation of adenylate cyclase activity                                                          | 2/13/2024 | 56/18903  | 0.00065842788  | 0.0095691538   | 0.003754028779 | DRD2/CRHR1                   | 2     |
| BP       | GO:1903170 | negative regulation of calcium ion transmembrane transport                                        | 2/13/2024 | 56/18903  | 0.00065842788  | 0.0095691538   | 0.003754028779 | DRD2/CRHR1                   | 2     |
| BP       | GO:0048168 | regulation of neuronal synaptic plasticity                                                        | 2/13/2024 | 57/18903  | 0.000682106091 | 0.0095691538   | 0.003754028779 | APOE/DRD2                    | 2     |
| BP       | GO:0010578 | regulation of adenylate cyclase activity involved in G protein-coupled receptor signaling pathway | 1/13/2024 | 1/18903   | 0.000687721526 | 0.0095691538   | 0.003754028779 | CRHR1                        | 1     |
| BP       | GO:0010900 | negative regulation of phosphatidylcholine catabolic process                                      | 1/13/2024 | 1/18903   | 0.000687721526 | 0.0095691538   | 0.003754028779 | APOC1                        | 1     |
| BP       | GO:0071831 | intermediate-density lipoprotein particle clearance                                               | 1/13/2024 | 1/18903   | 0.000687721526 | 0.0095691538   | 0.003754028779 | APOE                         | 1     |
| BP       | GO:0090731 | cellular response to very-low-density lipoprotein particle stimulus                               | 1/13/2024 | 1/18903   | 0.000687721526 | 0.0095691538   | 0.003754028779 | APOE                         | 1     |
| BP       | GO:0150200 | regulation of transport across blood-brain barrier                                                | 1/13/2024 | 1/18903   | 0.000687721526 | 0.0095691538   | 0.003754028779 | APOE                         | 1     |

| ONTOLOGY | ID         | Description                                                                        | GeneRatio | BgRatio   | pvalue         | p.adjust       | qvalue         | geneID            | Count |
|----------|------------|------------------------------------------------------------------------------------|-----------|-----------|----------------|----------------|----------------|-------------------|-------|
| BP       | GO:0150201 | positive regulation of transport across blood-brain barrier                        | 1/13/2024 | 1/18903   | 0.000687721526 | 0.0095691538   | 0.003754028779 | APOE              | 1     |
| BP       | GO:1903000 | regulation of lipid transport across blood-brain barrier                           | 1/13/2024 | 1/18903   | 0.000687721526 | 0.0095691538   | 0.003754028779 | APOE              | 1     |
| BP       | GO:1903002 | positive regulation of lipid transport across blood-brain barrier                  | 1/13/2024 | 1/18903   | 0.000687721526 | 0.0095691538   | 0.003754028779 | APOE              | 1     |
| BP       | GO:1905853 | regulation of heparan sulfate binding                                              | 1/13/2024 | 1/18903   | 0.000687721526 | 0.0095691538   | 0.003754028779 | APOE              | 1     |
| BP       | GO:1905855 | positive regulation of heparan sulfate binding                                     | 1/13/2024 | 1/18903   | 0.000687721526 | 0.0095691538   | 0.003754028779 | APOE              | 1     |
| BP       | GO:1905858 | regulation of heparan sulfate proteoglycan binding                                 | 1/13/2024 | 1/18903   | 0.000687721526 | 0.0095691538   | 0.003754028779 | APOE              | 1     |
| BP       | GO:1905860 | positive regulation of heparan sulfate proteoglycan binding                        | 1/13/2024 | 1/18903   | 0.000687721526 | 0.0095691538   | 0.003754028779 | APOE              | 1     |
| BP       | GO:1905890 | regulation of cellular response to very-low-density lipoprotein particle stimulus  | 1/13/2024 | 1/18903   | 0.000687721526 | 0.0095691538   | 0.003754028779 | APOE              | 1     |
| BP       | GO:0032412 | regulation of ion transmembrane transporter activity                               | 3/13/2024 | 281/18903 | 0.000832317252 | 0.011110835359 | 0.004358838469 | DRD2/CRHR1/PDE4B  | 3     |
| BP       | GO:0051055 | negative regulation of lipid biosynthetic process                                  | 2/13/2024 | 63/18903  | 0.00083274228  | 0.011110835359 | 0.004358838469 | APOE/APOC1        | 2     |
| BP       | GO:2001258 | negative regulation of cation channel activity                                     | 2/13/2024 | 63/18903  | 0.00083274228  | 0.011110835359 | 0.004358838469 | DRD2/CRHR1        | 2     |
| BP       | GO:0022898 | regulation of transmembrane transporter activity                                   | 3/13/2024 | 291/18903 | 0.000921038984 | 0.011961226277 | 0.004692451247 | DRD2/CRHR1/PDE4B  | 3     |
| BP       | GO:0046879 | hormone secretion                                                                  | 3/13/2024 | 291/18903 | 0.000921038984 | 0.011961226277 | 0.004692451247 | DRD2/SPINK1/CRHR1 | 3     |
| BP       | GO:0015909 | long-chain fatty acid transport                                                    | 2/13/2024 | 67/18903  | 0.000941289832 | 0.012063372325 | 0.004732523672 | APOE/DRD2         | 2     |
| BP       | GO:0042886 | amide transport                                                                    | 3/13/2024 | 296/18903 | 0.00096757484  | 0.012239193431 | 0.004801499206 | DRD2/SPINK1/CRHR1 | 3     |
| BP       | GO:0009914 | hormone transport                                                                  | 3/13/2024 | 300/18903 | 0.001005864851 | 0.012560414931 | 0.00492751607  | DRD2/SPINK1/CRHR1 | 3     |
| BP       | GO:0033344 | cholesterol efflux                                                                 | 2/13/2024 | 71/18903  | 0.00105630004  | 0.013023243534 | 0.005109086137 | APOE/APOC1        | 2     |
| BP       | GO:0050709 | negative regulation of protein secretion                                           | 2/13/2024 | 72/18903  | 0.001086058769 | 0.013222765507 | 0.005187359644 | APOE/DRD2         | 2     |
| BP       | GO:0050795 | regulation of behavior                                                             | 2/13/2024 | 73/18903  | 0.001116219006 | 0.013422189031 | 0.005265594529 | APOE/DRD2         | 2     |
| BP       | GO:0051339 | regulation of lyase activity                                                       | 2/13/2024 | 76/18903  | 0.00120910397  | 0.014361795937 | 0.005634207203 | DRD2/CRHR1        | 2     |
| BP       | GO:0031279 | regulation of cyclase activity                                                     | 2/13/2024 | 77/18903  | 0.001240865445 | 0.014561481241 | 0.005712544786 | DRD2/CRHR1        | 2     |
| BP       | GO:0032409 | regulation of transporter activity                                                 | 3/13/2024 | 326/18903 | 0.001278421669 | 0.014717101992 | 0.005773595616 | DRD2/CRHR1/PDE4B  | 3     |
| BP       | GO:0032371 | regulation of sterol transport                                                     | 2/13/2024 | 81/18903  | 0.00137189768  | 0.014717101992 | 0.005773595616 | APOE/APOC1        | 2     |
| BP       | GO:0032374 | regulation of cholesterol transport                                                | 2/13/2024 | 81/18903  | 0.00137189768  | 0.014717101992 | 0.005773595616 | APOE/APOC1        | 2     |
| BP       | GO:0033555 | multicellular organismal response to stress                                        | 2/13/2024 | 81/18903  | 0.00137189768  | 0.014717101992 | 0.005773595616 | APOE/CRHR1        | 2     |
| BP       | GO:0010877 | lipid transport involved in lipid storage                                          | 1/13/2024 | 2/18903   | 0.001375006449 | 0.014717101992 | 0.005773595616 | APOE              | 1     |
| BP       | GO:0051867 | general adaptation syndrome, behavioral process                                    | 1/13/2024 | 2/18903   | 0.001375006449 | 0.014717101992 | 0.005773595616 | CRHR1             | 1     |
| BP       | GO:0150174 | negative regulation of phosphatidylcholine metabolic process                       | 1/13/2024 | 2/18903   | 0.001375006449 | 0.014717101992 | 0.005773595616 | APOC1             | 1     |
| BP       | GO:1901898 | negative regulation of relaxation of cardiac muscle                                | 1/13/2024 | 2/18903   | 0.001375006449 | 0.014717101992 | 0.005773595616 | PDE4B             | 1     |
| BP       | GO:0001933 | negative regulation of protein phosphorylation                                     | 3/13/2024 | 338/18903 | 0.001418519335 | 0.015017802523 | 0.005891561997 | APOE/DRD2/SPINK1  | 3     |
| BP       | GO:0097006 | regulation of plasma lipoprotein particle levels                                   | 2/13/2024 | 84/18903  | 0.00147434414  | 0.015440980565 | 0.006057576943 | APOE/APOC1        | 2     |
| BP       | GO:0070588 | calcium ion transmembrane transport                                                | 3/13/2024 | 345/18903 | 0.001504555656 | 0.015589757545 | 0.006115942925 | DRD2/CRHR1/PDE4B  | 3     |
| BP       | GO:0032413 | negative regulation of ion transmembrane transporter activity                      | 2/13/2024 | 89/18903  | 0.00165299735  | 0.016947572832 | 0.006648620921 | DRD2/CRHR1        | 2     |
| BP       | GO:0090277 | positive regulation of peptide hormone secretion                                   | 2/13/2024 | 92/18903  | 0.00176491385  | 0.017772095516 | 0.006972085456 | DRD2/SPINK1       | 2     |
| BP       | GO:0002793 | positive regulation of peptide secretion                                           | 2/13/2024 | 94/18903  | 0.00184148553  | 0.017772095516 | 0.006972085456 | DRD2/SPINK1       | 2     |
| BP       | GO:0045807 | positive regulation of endocytosis                                                 | 2/13/2024 | 96/18903  | 0.001919621344 | 0.017772095516 | 0.006972085456 | APOE/DRD2         | 2     |
| BP       | GO:0042326 | negative regulation of phosphorylation                                             | 3/13/2024 | 381/18903 | 0.001999149697 | 0.017772095516 | 0.006972085456 | APOE/DRD2/SPINK1  | 3     |
| BP       | GO:0010751 | negative regulation of nitric oxide mediated signal transduction                   | 1/13/2024 | 3/18903   | 0.002061855024 | 0.017772095516 | 0.006972085456 | SPINK1            | 1     |
| BP       | GO:0010899 | regulation of phosphatidylcholine catabolic process                                | 1/13/2024 | 3/18903   | 0.002061855024 | 0.017772095516 | 0.006972085456 | APOC1             | 1     |
| BP       | GO:0021769 | orbitofrontal cortex development                                                   | 1/13/2024 | 3/18903   | 0.002061855024 | 0.017772095516 | 0.006972085456 | DRD2              | 1     |
| BP       | GO:0032805 | positive regulation of low-density lipoprotein particle receptor catabolic process | 1/13/2024 | 3/18903   | 0.002061855024 | 0.017772095516 | 0.006972085456 | APOE              | 1     |
| BP       | GO:0044467 | glial cell-derived neurotrophic factor production                                  | 1/13/2024 | 3/18903   | 0.002061855024 | 0.017772095516 | 0.006972085456 | DRD2              | 1     |
| BP       | GO:0051586 | positive regulation of dopamine uptake involved in synaptic transmission           | 1/13/2024 | 3/18903   | 0.002061855024 | 0.017772095516 | 0.006972085456 | DRD2              | 1     |
| BP       | GO:0051866 | general adaptation syndrome                                                        | 1/13/2024 | 3/18903   | 0.002061855024 | 0.017772095516 | 0.006972085456 | CRHR1             | 1     |
| BP       | GO:0051944 | positive regulation of catecholamine uptake involved in synaptic transmission      | 1/13/2024 | 3/18903   | 0.002061855024 | 0.017772095516 | 0.006972085456 | DRD2              | 1     |
| BP       | GO:0060160 | negative regulation of dopamine receptor signaling pathway                         | 1/13/2024 | 3/18903   | 0.002061855024 | 0.017772095516 | 0.006972085456 | DRD2              | 1     |
| BP       | GO:0061771 | response to caloric restriction                                                    | 1/13/2024 | 3/18903   | 0.002061855024 | 0.017772095516 | 0.006972085456 | APOE              | 1     |
| BP       | GO:0090187 | positive regulation of pancreatic juice secretion                                  | 1/13/2024 | 3/18903   | 0.002061855024 | 0.017772095516 | 0.006972085456 | SPINK1            | 1     |
| BP       | GO:1900166 | regulation of glial cell-derived neurotrophic factor production                    | 1/13/2024 | 3/18903   | 0.002061855024 | 0.017772095516 | 0.006972085456 | DRD2/CRHR1/PDE4B  | 3     |
| BP       | GO:1900168 | positive regulation of glial cell-derived neurotrophic factor production           | 1/13/2024 | 3/18903   | 0.002061855024 | 0.017772095516 | 0.006972085456 | DRD2              | 1     |
| BP       | GO:2000852 | regulation of corticosterone secretion                                             | 1/13/2024 | 3/18903   | 0.002061855024 | 0.017772095516 | 0.006972085456 | CRHR1             | 1     |
| BP       | GO:0098869 | cellular oxidant detoxification                                                    | 2/13/2024 | 100/18903 | 0.002080570291 | 0.017776100558 | 0.006973656655 | APOE/GSTO2        | 2     |
| BP       | GO:0015908 | fatty acid transport                                                               | 2/13/2024 | 101/18903 | 0.002121779225 | 0.017942550291 | 0.007038955575 | APOE/DRD2         | 2     |
| BP       | GO:0050878 | regulation of body fluid levels                                                    | 3/13/2024 | 390/18903 | 0.002136895107 | 0.017942550291 | 0.007038955575 | APOE/DRD2/SPINK1  | 3     |
| BP       | GO:0019218 | regulation of steroid metabolic process                                            | 2/13/2024 | 102/18903 | 0.002163375898 | 0.01800964209  | 0.007065276212 | APOE/APOC1        | 2     |
| BP       | GO:1904062 | regulation of cation transmembrane transport                                       | 3/13/2024 | 394/18903 | 0.00219997931  | 0.018093302397 | 0.007098096585 | DRD2/CRHR1/PDE4B  | 3     |
| BP       | GO:0006641 | triglyceride metabolic process                                                     | 2/13/2024 | 104/18903 | 0.002247730585 | 0.018093302397 | 0.007098096585 | APOE/APOC1        | 2     |
| BP       | GO:0015914 | phospholipid transport                                                             | 2/13/2024 | 104/18903 | 0.002247730585 | 0.018093302397 | 0.007098096585 | APOE/APOC1        | 2     |
| BP       | GO:0060291 | long-term synaptic potentiation                                                    | 2/13/2024 | 104/18903 | 0.002247730585 | 0.018093302397 | 0.007098096585 | APOE/DRD2         | 2     |
| BP       | GO:0071868 | cellular response to monoamine stimulus                                            | 2/13/2024 | 105/18903 | 0.002290487663 | 0.018137682792 | 0.007115507245 | DRD2/PDE4B        | 2     |
| BP       | GO:0071870 | cellular response to catecholamine stimulus                                        | 2/13/2024 | 105/18903 | 0.002290487663 | 0.018137682792 | 0.007115507245 | DRD2/PDE4B        | 2     |
| BP       | GO:0062014 | negative regulation of small molecule metabolic process                            | 2/13/2024 | 108/18903 | 0.002421072215 | 0.018715272522 | 0.007342098698 | APOE/APOC1        | 2     |
| BP       | GO:0071867 | response to monoamine                                                              | 2/13/2024 | 108/18903 | 0.002421072215 | 0.018715272522 | 0.007342098698 | DRD2/PDE4B        | 2     |
| BP       | GO:0071869 | response to catecholamine                                                          | 2/13/2024 | 108/18903 | 0.002421072215 | 0.018715272522 | 0.007342098698 | DRD2/PDE4B        | 2     |
| BP       | GO:1904063 | negative regulation of cation transmembrane transport                              | 2/13/2024 | 109/18903 | 0.002465369949 | 0.018718968878 | 0.007343548798 | DRD2/CRHR1        | 2     |

| ONTOLOGY | ID         | Description                                                                                                         | GeneRatio | BgRatio   | pvalue         | p.adjust       | qvalue         | geneID            | Count |
|----------|------------|---------------------------------------------------------------------------------------------------------------------|-----------|-----------|----------------|----------------|----------------|-------------------|-------|
| BP       | GO:0045833 | negative regulation of lipid metabolic process                                                                      | 2/13/2024 | 110/18903 | 0.00251005168  | 0.018718968878 | 0.007343548798 | APOE/APOC1        | 2     |
| BP       | GO:0050678 | regulation of epithelial cell proliferation                                                                         | 3/13/2024 | 414/18903 | 0.002532930168 | 0.018718968878 | 0.007343548798 | APOE/DRD2/SPINK1  | 3     |
| BP       | GO:0048259 | regulation of receptor-mediated endocytosis                                                                         | 2/13/2024 | 112/18903 | 0.002600565268 | 0.018718968878 | 0.007343548798 | DRD2/APOC1        | 2     |
| BP       | GO:0032410 | negative regulation of transporter activity                                                                         | 2/13/2024 | 115/18903 | 0.002739203988 | 0.018718968878 | 0.007343548798 | DRD2/CRHR1        | 2     |
| BP       | GO:0034766 | negative regulation of ion transmembrane transport                                                                  | 2/13/2024 | 115/18903 | 0.002739203988 | 0.018718968878 | 0.007343548798 | DRD2/CRHR1        | 2     |
| BP       | GO:1990748 | cellular detoxification                                                                                             | 2/13/2024 | 115/18903 | 0.002739203988 | 0.018718968878 | 0.007343548798 | APOE/GSTO2        | 2     |
| BP       | GO:0010873 | positive regulation of cholesterol esterification                                                                   | 1/13/2024 | 4/18903   | 0.002748267505 | 0.018718968878 | 0.007343548798 | APOE/APOC1        | 1     |
| BP       | GO:0010916 | negative regulation of very-low-density lipoprotein particle clearance                                              | 1/13/2024 | 4/18903   | 0.002748267505 | 0.018718968878 | 0.007343548798 | APOC1             | 1     |
| BP       | GO:0042321 | negative regulation of circadian sleep/wake cycle, sleep                                                            | 1/13/2024 | 4/18903   | 0.002748267505 | 0.018718968878 | 0.007343548798 | DRD2              | 1     |
| BP       | GO:0097114 | NMDA glutamate receptor clustering                                                                                  | 1/13/2024 | 4/18903   | 0.002748267505 | 0.018718968878 | 0.007343548798 | APOE              | 1     |
| BP       | GO:0140192 | regulation of adenylate cyclase-activating adrenergic receptor signaling pathway involved in heart process          | 1/13/2024 | 4/18903   | 0.002748267505 | 0.018718968878 | 0.007343548798 | PDE4B             | 1     |
| BP       | GO:0140199 | negative regulation of adenylate cyclase-activating adrenergic receptor signaling pathway involved in heart process | 1/13/2024 | 4/18903   | 0.002748267505 | 0.018718968878 | 0.007343548798 | PDE4B             | 1     |
| BP       | GO:1902952 | positive regulation of dendritic spine maintenance                                                                  | 1/13/2024 | 4/18903   | 0.002748267505 | 0.018718968878 | 0.007343548798 | APOE              | 1     |
| BP       | GO:1902994 | regulation of phospholipid efflux                                                                                   | 1/13/2024 | 4/18903   | 0.002748267505 | 0.018718968878 | 0.007343548798 | APOE              | 1     |
| BP       | GO:1902995 | positive regulation of phospholipid efflux                                                                          | 1/13/2024 | 4/18903   | 0.002748267505 | 0.018718968878 | 0.007343548798 | APOE              | 1     |
| BP       | GO:1905908 | positive regulation of amyloid fibril formation                                                                     | 1/13/2024 | 4/18903   | 0.002748267505 | 0.018718968878 | 0.007343548798 | APOE              | 1     |
| BP       | GO:0009410 | response to xenobiotic stimulus                                                                                     | 3/13/2024 | 432/18903 | 0.002858136198 | 0.01933211567  | 0.007584089472 | DRD2/PDE4B/GSTO2  | 3     |
| BP       | GO:0007613 | memory                                                                                                              | 2/13/2024 | 120/18903 | 0.002977886468 | 0.020003182204 | 0.007847352361 | APOE/DRD2         | 2     |
| BP       | GO:0030301 | cholesterol transport                                                                                               | 2/13/2024 | 121/18903 | 0.003026761486 | 0.020192230738 | 0.007921517084 | APOE/APOC1        | 2     |
| BP       | GO:0046887 | positive regulation of hormone secretion                                                                            | 2/13/2024 | 123/18903 | 0.003125646349 | 0.020570132051 | 0.008069769734 | DRD2/SPINK1       | 2     |
| BP       | GO:0097237 | cellular response to toxic substance                                                                                | 2/13/2024 | 123/18903 | 0.003125646349 | 0.020570132051 | 0.008069769734 | APOE/GSTO2        | 2     |
| BP       | GO:0051224 | negative regulation of protein transport                                                                            | 2/13/2024 | 129/18903 | 0.003431346347 | 0.021580347078 | 0.00846608234  | APOE/DRD2         | 2     |
| BP       | GO:0010915 | regulation of very-low-density lipoprotein particle clearance                                                       | 1/13/2024 | 5/18903   | 0.003434244145 | 0.021580347078 | 0.00846608234  | APOC1             | 1     |
| BP       | GO:0033602 | negative regulation of dopamine secretion                                                                           | 1/13/2024 | 5/18903   | 0.003434244145 | 0.021580347078 | 0.00846608234  | DRD2              | 1     |
| BP       | GO:0035934 | corticosterone secretion                                                                                            | 1/13/2024 | 5/18903   | 0.003434244145 | 0.021580347078 | 0.00846608234  | CRHR1             | 1     |
| BP       | GO:0043435 | response to corticotropin-releasing hormone                                                                         | 1/13/2024 | 5/18903   | 0.003434244145 | 0.021580347078 | 0.00846608234  | CRHR1             | 1     |
| BP       | GO:0071376 | cellular response to corticotropin-releasing hormone stimulus                                                       | 1/13/2024 | 5/18903   | 0.003434244145 | 0.021580347078 | 0.00846608234  | CRHR1             | 1     |
| BP       | GO:0090325 | regulation of locomotion involved in locomotory behavior                                                            | 1/13/2024 | 5/18903   | 0.003434244145 | 0.021580347078 | 0.00846608234  | DRD2              | 1     |
| BP       | GO:0006639 | acylglycerol metabolic process                                                                                      | 2/13/2024 | 132/18903 | 0.003589261629 | 0.022314079112 | 0.008753929231 | APOE/APOC1        | 2     |
| BP       | GO:0023061 | signal release                                                                                                      | 3/13/2024 | 470/18903 | 0.003627239462 | 0.022314079112 | 0.008753929231 | DRD2/SPINK1/CRHR1 | 3     |
| BP       | GO:0006638 | neutral lipid metabolic process                                                                                     | 2/13/2024 | 133/18903 | 0.003642647411 | 0.022314079112 | 0.008753929231 | APOE/APOC1        | 2     |
| BP       | GO:1904950 | negative regulation of establishment of protein localization                                                        | 2/13/2024 | 133/18903 | 0.003642647411 | 0.022314079112 | 0.008753929231 | APOE/DRD2         | 2     |
| BP       | GO:0015918 | sterol transport                                                                                                    | 2/13/2024 | 135/18903 | 0.003750537262 | 0.02268958567  | 0.008901242406 | APOE/APOC1        | 2     |
| BP       | GO:0035270 | endocrine system development                                                                                        | 2/13/2024 | 135/18903 | 0.003750537262 | 0.02268958567  | 0.008901242406 | DRD2/CRHR1        | 2     |
| BP       | GO:0050673 | epithelial cell proliferation                                                                                       | 3/13/2024 | 481/18903 | 0.003871436472 | 0.022799265813 | 0.008944270496 | APOE/DRD2/SPINK1  | 3     |
| BP       | GO:0008203 | cholesterol metabolic process                                                                                       | 2/13/2024 | 139/18903 | 0.003970777321 | 0.022799265813 | 0.008944270496 | APOE/APOC1        | 2     |
| BP       | GO:0008277 | regulation of G protein-coupled receptor signaling pathway                                                          | 2/13/2024 | 139/18903 | 0.003970777321 | 0.022799265813 | 0.008944270496 | DRD2/PDE4B        | 2     |
| BP       | GO:0042157 | lipoprotein metabolic process                                                                                       | 2/13/2024 | 140/18903 | 0.004026763917 | 0.022799265813 | 0.008944270496 | APOE/APOC1        | 2     |
| BP       | GO:0007195 | adenylate cyclase-inhibiting dopamine receptor signaling pathway                                                    | 1/13/2024 | 6/18903   | 0.004119785198 | 0.022799265813 | 0.008944270496 | DRD2              | 1     |
| BP       | GO:0007270 | neuron-neuron synaptic transmission                                                                                 | 1/13/2024 | 6/18903   | 0.004119785198 | 0.022799265813 | 0.008944270496 | DRD2              | 1     |
| BP       | GO:0010872 | regulation of cholesterol esterification                                                                            | 1/13/2024 | 6/18903   | 0.004119785198 | 0.022799265813 | 0.008944270496 | APOC1             | 1     |
| BP       | GO:0021853 | cerebral cortex GABAergic interneuron migration                                                                     | 1/13/2024 | 6/18903   | 0.004119785198 | 0.022799265813 | 0.008944270496 | DRD2              | 1     |
| BP       | GO:0032799 | low-density lipoprotein receptor particle metabolic process                                                         | 1/13/2024 | 6/18903   | 0.004119785198 | 0.022799265813 | 0.008944270496 | APOE              | 1     |
| BP       | GO:0032802 | low-density lipoprotein particle receptor catabolic process                                                         | 1/13/2024 | 6/18903   | 0.004119785198 | 0.022799265813 | 0.008944270496 | APOE              | 1     |
| BP       | GO:0032803 | regulation of low-density lipoprotein particle receptor catabolic process                                           | 1/13/2024 | 6/18903   | 0.004119785198 | 0.022799265813 | 0.008944270496 | APOE              | 1     |
| BP       | GO:0051582 | positive regulation of neurotransmitter uptake                                                                      | 1/13/2024 | 6/18903   | 0.004119785198 | 0.022799265813 | 0.008944270496 | DRD2              | 1     |
| BP       | GO:0071878 | negative regulation of adenylate cyclase-activating adrenergic receptor signaling pathway                           | 1/13/2024 | 6/18903   | 0.004119785198 | 0.022799265813 | 0.008944270496 | PDE4B             | 1     |
| BP       | GO:1901897 | regulation of relaxation of cardiac muscle                                                                          | 1/13/2024 | 6/18903   | 0.004119785198 | 0.022799265813 | 0.008944270496 | PDE4B             | 1     |
| BP       | GO:1990379 | lipid transport across blood-brain barrier                                                                          | 1/13/2024 | 6/18903   | 0.004119785198 | 0.022799265813 | 0.008944270496 | APOE              | 1     |
| BP       | GO:0030534 | adult behavior                                                                                                      | 2/13/2024 | 143/18903 | 0.004196940224 | 0.023095026997 | 0.009060299146 | DRD2/CRHR1        | 2     |
| BP       | GO:0015748 | organophosphate ester transport                                                                                     | 2/13/2024 | 148/18903 | 0.004487928564 | 0.024345937416 | 0.009551037806 | APOE/APOC1        | 2     |
| BP       | GO:1902652 | secondary alcohol metabolic process                                                                                 | 2/13/2024 | 149/18903 | 0.004547226331 | 0.024345937416 | 0.009551037806 | APOE/APOC1        | 2     |
| BP       | GO:1903531 | negative regulation of secretion by cell                                                                            | 2/13/2024 | 151/18903 | 0.004666918348 | 0.024345937416 | 0.009551037806 | APOE/DRD2         | 2     |
| BP       | GO:0007221 | positive regulation of transcription of Notch receptor target                                                       | 1/13/2024 | 7/18903   | 0.004804890918 | 0.024345937416 | 0.009551037806 | MAML3             | 1     |
| BP       | GO:0021894 | cerebral cortex GABAergic interneuron development                                                                   | 1/13/2024 | 7/18903   | 0.004804890918 | 0.024345937416 | 0.009551037806 | DRD2              | 1     |
| BP       | GO:0051005 | negative regulation of lipoprotein lipase activity                                                                  | 1/13/2024 | 7/18903   | 0.004804890918 | 0.024345937416 | 0.009551037806 | APOC1             | 1     |
| BP       | GO:0051458 | corticotropin secretion                                                                                             | 1/13/2024 | 7/18903   | 0.004804890918 | 0.024345937416 | 0.009551037806 | CRHR1             | 1     |
| BP       | GO:0051823 | regulation of synapse structural plasticity                                                                         | 1/13/2024 | 7/18903   | 0.004804890918 | 0.024345937416 | 0.009551037806 | DRD2              | 1     |
| BP       | GO:0060696 | regulation of phospholipid catabolic process                                                                        | 1/13/2024 | 7/18903   | 0.004804890918 | 0.024345937416 | 0.009551037806 | APOC1             | 1     |
| BP       | GO:0090186 | regulation of pancreatic juice secretion                                                                            | 1/13/2024 | 7/18903   | 0.004804890918 | 0.024345937416 | 0.009551037806 | SPINK1            | 1     |
| BP       | GO:1901078 | negative regulation of relaxation of muscle                                                                         | 1/13/2024 | 7/18903   | 0.004804890918 | 0.024345937416 | 0.009551037806 | PDE4B             | 1     |
| BP       | GO:1990384 | hyaloid vascular plexus regression                                                                                  | 1/13/2024 | 7/18903   | 0.004804890918 | 0.024345937416 | 0.009551037806 | DRD2              | 1     |
| BP       | GO:2000646 | positive regulation of receptor catabolic process                                                                   | 1/13/2024 | 7/18903   | 0.004804890918 | 0.024345937416 | 0.009551037806 | APOE              | 1     |
| BP       | GO:0016125 | sterol metabolic process                                                                                            | 2/13/2024 | 154/18903 | 0.00484919082  | 0.024345937416 | 0.009551037806 | APOE/APOC1        | 2     |
| BP       | GO:0034763 | negative regulation of transmembrane transport                                                                      | 2/13/2024 | 154/18903 | 0.00484919082  | 0.024345937416 | 0.009551037806 | DRD2/CRHR1        | 2     |

| ONTOLOGY | ID         | Description                                                                                  | GeneRatio | BgRatio   | pvalue         | p.adjust       | qvalue         | geneID       | Count |
|----------|------------|----------------------------------------------------------------------------------------------|-----------|-----------|----------------|----------------|----------------|--------------|-------|
| BP       | GO:0045834 | positive regulation of lipid metabolic process                                               | 2/13/2024 | 154/18903 | 0.00484919082  | 0.024345937416 | 0.009551037806 | APOE/APOC1   | 2     |
| BP       | GO:0098754 | detoxification                                                                               | 2/13/2024 | 154/18903 | 0.00484919082  | 0.024345937416 | 0.009551037806 | APOE/GSTO2   | 2     |
| BP       | GO:0046434 | organophosphate catabolic process                                                            | 2/13/2024 | 161/18903 | 0.005287191054 | 0.025705927683 | 0.010084569057 | PDE4B/APOC1  | 2     |
| BP       | GO:0017038 | protein import                                                                               | 1/13/2024 | 8/18903   | 0.005489561558 | 0.025705927683 | 0.010084569057 | APOE         | 1     |
| BP       | GO:0032489 | regulation of Cdc42 protein signal transduction                                              | 1/13/2024 | 8/18903   | 0.005489561558 | 0.025705927683 | 0.010084569057 | APOE         | 1     |
| BP       | GO:0045541 | negative regulation of cholesterol biosynthetic process                                      | 1/13/2024 | 8/18903   | 0.005489561558 | 0.025705927683 | 0.010084569057 | APOE         | 1     |
| BP       | GO:0051584 | regulation of dopamine uptake involved in synaptic transmission                              | 1/13/2024 | 8/18903   | 0.005489561558 | 0.025705927683 | 0.010084569057 | DRD2         | 1     |
| BP       | GO:0051940 | regulation of catecholamine uptake involved in synaptic transmission                         | 1/13/2024 | 8/18903   | 0.005489561558 | 0.025705927683 | 0.010084569057 | DRD2         | 1     |
| BP       | GO:0060158 | phospholipase C-activating dopamine receptor signaling pathway                               | 1/13/2024 | 8/18903   | 0.005489561558 | 0.025705927683 | 0.010084569057 | DRD2         | 1     |
| BP       | GO:0090206 | negative regulation of cholesterol metabolic process                                         | 1/13/2024 | 8/18903   | 0.005489561558 | 0.025705927683 | 0.010084569057 | APOE         | 1     |
| BP       | GO:0106119 | negative regulation of sterol biosynthetic process                                           | 1/13/2024 | 8/18903   | 0.005489561558 | 0.025705927683 | 0.010084569057 | APOE         | 1     |
| BP       | GO:1900004 | negative regulation of serine-type endopeptidase activity                                    | 1/13/2024 | 8/18903   | 0.005489561558 | 0.025705927683 | 0.010084569057 | SPINK1       | 1     |
| BP       | GO:1900223 | positive regulation of amyloid-beta clearance                                                | 1/13/2024 | 8/18903   | 0.005489561558 | 0.025705927683 | 0.010084569057 | APOE         | 1     |
| BP       | GO:1902572 | negative regulation of serine-type peptidase activity                                        | 1/13/2024 | 8/18903   | 0.005489561558 | 0.025705927683 | 0.010084569057 | SPINK1       | 1     |
| BP       | GO:1903726 | negative regulation of phospholipid metabolic process                                        | 1/13/2024 | 8/18903   | 0.005489561558 | 0.025705927683 | 0.010084569057 | APOC1        | 1     |
| BP       | GO:1905920 | positive regulation of CoA-transferase activity                                              | 1/13/2024 | 8/18903   | 0.005489561558 | 0.025705927683 | 0.010084569057 | APOE         | 1     |
| BP       | GO:0050806 | positive regulation of synaptic transmission                                                 | 2/13/2024 | 170/18903 | 0.005876251232 | 0.027149687778 | 0.010650963648 | APOE/DRD2    | 2     |
| BP       | GO:0006198 | cAMP catabolic process                                                                       | 1/13/2024 | 9/18903   | 0.006173797372 | 0.027149687778 | 0.010650963648 | PDE4B        | 1     |
| BP       | GO:0019852 | L-ascorbic acid metabolic process                                                            | 1/13/2024 | 9/18903   | 0.006173797372 | 0.027149687778 | 0.010650963648 | GSTO2        | 1     |
| BP       | GO:0021826 | substrate-independent telencephalic tangential migration                                     | 1/13/2024 | 9/18903   | 0.006173797372 | 0.027149687778 | 0.010650963648 | DRD2         | 1     |
| BP       | GO:0021830 | interneuron migration from the subpallium to the cortex                                      | 1/13/2024 | 9/18903   | 0.006173797372 | 0.027149687778 | 0.010650963648 | DRD2         | 1     |
| BP       | GO:0021843 | substrate-independent telencephalic tangential interneuron migration                         | 1/13/2024 | 9/18903   | 0.006173797372 | 0.027149687778 | 0.010650963648 | DRD2         | 1     |
| BP       | GO:0034433 | steroid esterification                                                                       | 1/13/2024 | 9/18903   | 0.006173797372 | 0.027149687778 | 0.010650963648 | APOC1        | 1     |
| BP       | GO:0034434 | sterol esterification                                                                        | 1/13/2024 | 9/18903   | 0.006173797372 | 0.027149687778 | 0.010650963648 | APOC1        | 1     |
| BP       | GO:0034435 | cholesterol esterification                                                                   | 1/13/2024 | 9/18903   | 0.006173797372 | 0.027149687778 | 0.010650963648 | APOC1        | 1     |
| BP       | GO:0060124 | positive regulation of growth hormone secretion                                              | 1/13/2024 | 9/18903   | 0.006173797372 | 0.027149687778 | 0.010650963648 | DRD2         | 1     |
| BP       | GO:0086023 | adenylate cyclase-activating adrenergic receptor signaling pathway involved in heart process | 1/13/2024 | 9/18903   | 0.006173797372 | 0.027149687778 | 0.010650963648 | PDE4B        | 1     |
| BP       | GO:1901334 | lactone metabolic process                                                                    | 1/13/2024 | 9/18903   | 0.006173797372 | 0.027149687778 | 0.010650963648 | GSTO2        | 1     |
| BP       | GO:2000822 | regulation of behavioral fear response                                                       | 1/13/2024 | 9/18903   | 0.006173797372 | 0.027149687778 | 0.010650963648 | APOE         | 1     |
| BP       | GO:0048660 | regulation of smooth muscle cell proliferation                                               | 2/13/2024 | 175/18903 | 0.006215996278 | 0.027149687778 | 0.010650963648 | APOE/ELN     | 2     |
| BP       | GO:0051048 | negative regulation of secretion                                                             | 2/13/2024 | 175/18903 | 0.006215996278 | 0.027149687778 | 0.010650963648 | APOE/DRD2    | 2     |
| BP       | GO:0050680 | negative regulation of epithelial cell proliferation                                         | 2/13/2024 | 176/18903 | 0.006285009153 | 0.027328566584 | 0.010721138733 | APOE/DRD2    | 2     |
| BP       | GO:0048659 | smooth muscle cell proliferation                                                             | 2/13/2024 | 179/18903 | 0.006494167555 | 0.027486835591 | 0.010783228487 | APOE/ELN     | 2     |
| BP       | GO:0090276 | regulation of peptide hormone secretion                                                      | 2/13/2024 | 179/18903 | 0.006494167555 | 0.027486835591 | 0.010783228487 | DRD2/SPINK1  | 2     |
| BP       | GO:0002791 | regulation of peptide secretion                                                              | 2/13/2024 | 182/18903 | 0.006706496364 | 0.027486835591 | 0.010783228487 | DRD2/SPINK1  | 2     |
| BP       | GO:0046890 | regulation of lipid biosynthetic process                                                     | 2/13/2024 | 182/18903 | 0.006706496364 | 0.027486835591 | 0.010783228487 | APOE/APOC1   | 2     |
| BP       | GO:0071466 | cellular response to xenobiotic stimulus                                                     | 2/13/2024 | 183/18903 | 0.006777975115 | 0.027486835591 | 0.010783228487 | PDE4B/GSTO2  | 2     |
| BP       | GO:0090087 | regulation of peptide transport                                                              | 2/13/2024 | 184/18903 | 0.006849804374 | 0.027486835591 | 0.010783228487 | DRD2/SPINK1  | 2     |
| BP       | GO:0006707 | cholesterol catabolic process                                                                | 1/13/2024 | 10/18903  | 0.006857598612 | 0.027486835591 | 0.010783228487 | APOE         | 1     |
| BP       | GO:0016127 | sterol catabolic process                                                                     | 1/13/2024 | 10/18903  | 0.006857598612 | 0.027486835591 | 0.010783228487 | APOE         | 1     |
| BP       | GO:0034379 | very-low-density lipoprotein particle assembly                                               | 1/13/2024 | 10/18903  | 0.006857598612 | 0.027486835591 | 0.010783228487 | APOC1        | 1     |
| BP       | GO:0051967 | negative regulation of synaptic transmission, glutamatergic                                  | 1/13/2024 | 10/18903  | 0.006857598612 | 0.027486835591 | 0.010783228487 | DRD2         | 1     |
| BP       | GO:0090281 | negative regulation of calcium ion import                                                    | 1/13/2024 | 10/18903  | 0.006857598612 | 0.027486835591 | 0.010783228487 | SPINK1       | 1     |
| BP       | GO:0097113 | AMPA glutamate receptor clustering                                                           | 1/13/2024 | 10/18903  | 0.006857598612 | 0.027486835591 | 0.010783228487 | APOE         | 1     |
| BP       | GO:0097688 | glutamate receptor clustering                                                                | 1/13/2024 | 10/18903  | 0.006857598612 | 0.027486835591 | 0.010783228487 | APOE         | 1     |
| BP       | GO:0150172 | regulation of phosphatidylcholine metabolic process                                          | 1/13/2024 | 10/18903  | 0.006857598612 | 0.027486835591 | 0.010783228487 | APOC1        | 1     |
| BP       | GO:1900003 | regulation of serine-type endopeptidase activity                                             | 1/13/2024 | 10/18903  | 0.006857598612 | 0.027486835591 | 0.010783228487 | SPINK1       | 1     |
| BP       | GO:1902571 | regulation of serine-type peptidase activity                                                 | 1/13/2024 | 10/18903  | 0.006857598612 | 0.027486835591 | 0.010783228487 | SPINK1       | 1     |
| BP       | GO:1903365 | regulation of fear response                                                                  | 1/13/2024 | 10/18903  | 0.006857598612 | 0.027486835591 | 0.010783228487 | APOE         | 1     |
| BP       | GO:1905918 | regulation of CoA-transferase activity                                                       | 1/13/2024 | 10/18903  | 0.006857598612 | 0.027486835591 | 0.010783228487 | APOE         | 1     |
| BP       | GO:2000849 | regulation of glucocorticoid secretion                                                       | 1/13/2024 | 10/18903  | 0.006857598612 | 0.027486835591 | 0.010783228487 | CRHR1        | 1     |
| BP       | GO:0021892 | cerebral cortex GABAergic interneuron differentiation                                        | 1/13/2024 | 11/18903  | 0.007540965532 | 0.029379601714 | 0.011525770477 | DRD2         | 1     |
| BP       | GO:0031987 | locomotion involved in locomotory behavior                                                   | 1/13/2024 | 11/18903  | 0.007540965532 | 0.029379601714 | 0.011525770477 | DRD2         | 1     |
| BP       | GO:0034776 | response to histamine                                                                        | 1/13/2024 | 11/18903  | 0.007540965532 | 0.029379601714 | 0.011525770477 | DRD2         | 1     |
| BP       | GO:0048755 | branching morphogenesis of a nerve                                                           | 1/13/2024 | 11/18903  | 0.007540965532 | 0.029379601714 | 0.011525770477 | DRD2         | 1     |
| BP       | GO:0060159 | regulation of dopamine receptor signaling pathway                                            | 1/13/2024 | 11/18903  | 0.007540965532 | 0.029379601714 | 0.011525770477 | DRD2         | 1     |
| BP       | GO:0071872 | cellular response to epinephrine stimulus                                                    | 1/13/2024 | 11/18903  | 0.007540965532 | 0.029379601714 | 0.011525770477 | PDE4B        | 1     |
| BP       | GO:2000644 | regulation of receptor catabolic process                                                     | 1/13/2024 | 11/18903  | 0.007540965532 | 0.029379601714 | 0.011525770477 | APOE         | 1     |
| BP       | GO:0061136 | regulation of proteasomal protein catabolic process                                          | 2/13/2024 | 194/18903 | 0.007587278544 | 0.029442268133 | 0.011550354839 | APOE/ZFAND2A | 2     |
| BP       | GO:0007626 | locomotory behavior                                                                          | 2/13/2024 | 197/18903 | 0.007815281794 | 0.029557479804 | 0.011595552976 | APOE/DRD2    | 2     |
| BP       | GO:0010749 | regulation of nitric oxide mediated signal transduction                                      | 1/13/2024 | 12/18903  | 0.008223898385 | 0.029557479804 | 0.011595552976 | SPINK1       | 1     |
| BP       | GO:0014854 | response to inactivity                                                                       | 1/13/2024 | 12/18903  | 0.008223898385 | 0.029557479804 | 0.011595552976 | DRD2         | 1     |
| BP       | GO:0030432 | peristalsis                                                                                  | 1/13/2024 | 12/18903  | 0.008223898385 | 0.029557479804 | 0.011595552976 | DRD2         | 1     |
| BP       | GO:0031223 | auditory behavior                                                                            | 1/13/2024 | 12/18903  | 0.008223898385 | 0.029557479804 | 0.011595552976 | DRD2         | 1     |
| BP       | GO:0034370 | triglyceride-rich lipoprotein particle remodeling                                            | 1/13/2024 | 12/18903  | 0.008223898385 | 0.029557479804 | 0.011595552976 | APOE         | 1     |

| ONTOLOGY | ID         | Description                                                                                      | GeneRatio | BgRatio   | pvalue         | p.adjust       | qvalue         | geneID       | Count |
|----------|------------|--------------------------------------------------------------------------------------------------|-----------|-----------|----------------|----------------|----------------|--------------|-------|
| BP       | GO:0034372 | very-low-density lipoprotein particle remodeling                                                 | 1/13/2024 | 12/18903  | 0.008223898385 | 0.029557479804 | 0.011595552976 | APOE         | 1     |
| BP       | GO:0035815 | positive regulation of renal sodium excretion                                                    | 1/13/2024 | 12/18903  | 0.008223898385 | 0.029557479804 | 0.011595552976 | DRD2         | 1     |
| BP       | GO:0035933 | glucocorticoid secretion                                                                         | 1/13/2024 | 12/18903  | 0.008223898385 | 0.029557479804 | 0.011595552976 | CRHR1        | 1     |
| BP       | GO:0042756 | drinking behavior                                                                                | 1/13/2024 | 12/18903  | 0.008223898385 | 0.029557479804 | 0.011595552976 | DRD2         | 1     |
| BP       | GO:0048521 | negative regulation of behavior                                                                  | 1/13/2024 | 12/18903  | 0.008223898385 | 0.029557479804 | 0.011595552976 | DRD2         | 1     |
| BP       | GO:0051583 | dopamine uptake involved in synaptic transmission                                                | 1/13/2024 | 12/18903  | 0.008223898385 | 0.029557479804 | 0.011595552976 | DRD2         | 1     |
| BP       | GO:0051934 | catecholamine uptake involved in synaptic transmission                                           | 1/13/2024 | 12/18903  | 0.008223898385 | 0.029557479804 | 0.011595552976 | DRD2         | 1     |
| BP       | GO:0060123 | regulation of growth hormone secretion                                                           | 1/13/2024 | 12/18903  | 0.008223898385 | 0.029557479804 | 0.011595552976 | DRD2         | 1     |
| BP       | GO:0060134 | prepulse inhibition                                                                              | 1/13/2024 | 12/18903  | 0.008223898385 | 0.029557479804 | 0.011595552976 | DRD2         | 1     |
| BP       | GO:0090209 | negative regulation of triglyceride metabolic process                                            | 1/13/2024 | 12/18903  | 0.008223898385 | 0.029557479804 | 0.011595552976 | APOE         | 1     |
| BP       | GO:0106072 | negative regulation of adenylate cyclase-activating G protein-coupled receptor signaling pathway | 1/13/2024 | 12/18903  | 0.008223898385 | 0.029557479804 | 0.011595552976 | PDE4B        | 1     |
| BP       | GO:1900272 | negative regulation of long-term synaptic potentiation                                           | 1/13/2024 | 12/18903  | 0.008223898385 | 0.029557479804 | 0.011595552976 | APOE         | 1     |
| BP       | GO:1902950 | regulation of dendritic spine maintenance                                                        | 1/13/2024 | 12/18903  | 0.008223898385 | 0.029557479804 | 0.011595552976 | APOE         | 1     |
| BP       | GO:2001223 | negative regulation of neuron migration                                                          | 1/13/2024 | 12/18903  | 0.008223898385 | 0.029557479804 | 0.011595552976 | DRD2         | 1     |
| BP       | GO:1903828 | negative regulation of protein localization                                                      | 2/13/2024 | 203/18903 | 0.008280575305 | 0.029651765982 | 0.011632541934 | APOE/DRD2    | 2     |
| BP       | GO:0007204 | positive regulation of cytosolic calcium ion concentration                                       | 2/13/2024 | 205/18903 | 0.008438412145 | 0.030106276299 | 0.011810848694 | DRD2/SPINK1  | 2     |
| BP       | GO:0048167 | regulation of synaptic plasticity                                                                | 2/13/2024 | 207/18903 | 0.008597612729 | 0.03056231678  | 0.011989755745 | APOE/DRD2    | 2     |
| BP       | GO:0045732 | positive regulation of protein catabolic process                                                 | 2/13/2024 | 209/18903 | 0.008758173608 | 0.030761812374 | 0.012068018904 | APOE/ZFAND2A | 2     |
| BP       | GO:0050807 | regulation of synapse organization                                                               | 2/13/2024 | 209/18903 | 0.008758173608 | 0.030761812374 | 0.012068018904 | APOE/DRD2    | 2     |
| BP       | GO:0009214 | cyclic nucleotide catabolic process                                                              | 1/13/2024 | 13/18903  | 0.008906397423 | 0.030761812374 | 0.012068018904 | PDE4B        | 1     |
| BP       | GO:0030157 | pancreatic juice secretion                                                                       | 1/13/2024 | 13/18903  | 0.008906397423 | 0.030761812374 | 0.012068018904 | SPINK1       | 1     |
| BP       | GO:0033604 | negative regulation of catecholamine secretion                                                   | 1/13/2024 | 13/18903  | 0.008906397423 | 0.030761812374 | 0.012068018904 | DRD2         | 1     |
| BP       | GO:0035810 | positive regulation of urine volume                                                              | 1/13/2024 | 13/18903  | 0.008906397423 | 0.030761812374 | 0.012068018904 | DRD2         | 1     |
| BP       | GO:0051481 | negative regulation of cytosolic calcium ion concentration                                       | 1/13/2024 | 13/18903  | 0.008906397423 | 0.030761812374 | 0.012068018904 | DRD2         | 1     |
| BP       | GO:1905907 | negative regulation of amyloid fibril formation                                                  | 1/13/2024 | 13/18903  | 0.008906397423 | 0.030761812374 | 0.012068018904 | APOE         | 1     |
| BP       | GO:0008016 | regulation of heart contraction                                                                  | 2/13/2024 | 214/18903 | 0.009165504533 | 0.031544881326 | 0.012375220924 | DRD2/PDE4B   | 2     |
| BP       | GO:0050803 | regulation of synapse structure or activity                                                      | 2/13/2024 | 215/18903 | 0.009247983639 | 0.031716676284 | 0.012442616979 | APOE/DRD2    | 2     |
| BP       | GO:0001976 | nervous system process involved in regulation of systemic arterial blood pressure                | 1/13/2024 | 14/18903  | 0.009588462898 | 0.031874275982 | 0.012504444416 | DRD2         | 1     |
| BP       | GO:0007638 | mechanosensory behavior                                                                          | 1/13/2024 | 14/18903  | 0.009588462898 | 0.031874275982 | 0.012504444416 | DRD2         | 1     |
| BP       | GO:0030252 | growth hormone secretion                                                                         | 1/13/2024 | 14/18903  | 0.009588462898 | 0.031874275982 | 0.012504444416 | DRD2         | 1     |
| BP       | GO:0042754 | negative regulation of circadian rhythm                                                          | 1/13/2024 | 14/18903  | 0.009588462898 | 0.031874275982 | 0.012504444416 | DRD2         | 1     |
| BP       | GO:0048148 | behavioral response to cocaine                                                                   | 1/13/2024 | 14/18903  | 0.009588462898 | 0.031874275982 | 0.012504444416 | DRD2         | 1     |
| BP       | GO:0071871 | response to epinephrine                                                                          | 1/13/2024 | 14/18903  | 0.009588462898 | 0.031874275982 | 0.012504444416 | PDE4B        | 1     |
| BP       | GO:1901077 | regulation of relaxation of muscle                                                               | 1/13/2024 | 14/18903  | 0.009588462898 | 0.031874275982 | 0.012504444416 | PDE4B        | 1     |
| BP       | GO:1901841 | regulation of high voltage-gated calcium channel activity                                        | 1/13/2024 | 14/18903  | 0.009588462898 | 0.031874275982 | 0.012504444416 | PDE4B        | 1     |
| BP       | GO:2001140 | positive regulation of phospholipid transport                                                    | 1/13/2024 | 14/18903  | 0.009588462898 | 0.031874275982 | 0.012504444416 | APOE         | 1     |
| BP       | GO:0070374 | positive regulation of ERK1 and ERK2 cascade                                                     | 2/13/2024 | 223/18903 | 0.009919899708 | 0.032689779714 | 0.012824370513 | APOE/DRD2    | 2     |
| BP       | GO:0051651 | maintenance of location in cell                                                                  | 2/13/2024 | 226/18903 | 0.010177378253 | 0.032689779714 | 0.012824370513 | APOE/DRD2    | 2     |
| BP       | GO:1903050 | regulation of proteolysis involved in protein catabolic process                                  | 2/13/2024 | 227/18903 | 0.010263868917 | 0.032689779714 | 0.012824370513 | APOE/ZFAND2A | 2     |
| BP       | GO:0002031 | G protein-coupled receptor internalization                                                       | 1/13/2024 | 15/18903  | 0.010270095064 | 0.032689779714 | 0.012824370513 | DRD2         | 1     |
| BP       | GO:0007567 | parturition                                                                                      | 1/13/2024 | 15/18903  | 0.010270095064 | 0.032689779714 | 0.012824370513 | CRHR1        | 1     |
| BP       | GO:0032488 | Cdc42 protein signal transduction                                                                | 1/13/2024 | 15/18903  | 0.010270095064 | 0.032689779714 | 0.012824370513 | APOE         | 1     |
| BP       | GO:0034380 | high-density lipoprotein particle assembly                                                       | 1/13/2024 | 15/18903  | 0.010270095064 | 0.032689779714 | 0.012824370513 | APOE         | 1     |
| BP       | GO:0034384 | high-density lipoprotein particle clearance                                                      | 1/13/2024 | 15/18903  | 0.010270095064 | 0.032689779714 | 0.012824370513 | APOE         | 1     |
| BP       | GO:0035641 | locomotory exploration behavior                                                                  | 1/13/2024 | 15/18903  | 0.010270095064 | 0.032689779714 | 0.012824370513 | APOE         | 1     |
| BP       | GO:0090205 | positive regulation of cholesterol metabolic process                                             | 1/13/2024 | 15/18903  | 0.010270095064 | 0.032689779714 | 0.012824370513 | APOE         | 1     |
| BP       | GO:0106070 | regulation of adenylate cyclase-activating G protein-coupled receptor signaling pathway          | 1/13/2024 | 15/18903  | 0.010270095064 | 0.032689779714 | 0.012824370513 | PDE4B        | 1     |
| BP       | GO:1904936 | interneuron migration                                                                            | 1/13/2024 | 15/18903  | 0.010270095064 | 0.032689779714 | 0.012824370513 | DRD2         | 1     |
| BP       | GO:2001138 | regulation of phospholipid transport                                                             | 1/13/2024 | 15/18903  | 0.010270095064 | 0.032689779714 | 0.012824370513 | APOE         | 1     |
| BP       | GO:0021984 | adenohypophysis development                                                                      | 1/13/2024 | 16/18903  | 0.010951294173 | 0.033125964361 | 0.012995488018 | DRD2         | 1     |
| BP       | GO:0034374 | low-density lipoprotein particle remodeling                                                      | 1/13/2024 | 16/18903  | 0.010951294173 | 0.033125964361 | 0.012995488018 | APOE         | 1     |
| BP       | GO:0034638 | phosphatidylcholine catabolic process                                                            | 1/13/2024 | 16/18903  | 0.010951294173 | 0.033125964361 | 0.012995488018 | APOC1        | 1     |
| BP       | GO:0042159 | lipoprotein catabolic process                                                                    | 1/13/2024 | 16/18903  | 0.010951294173 | 0.033125964361 | 0.012995488018 | APOE         | 1     |
| BP       | GO:0045187 | regulation of circadian sleep/wake cycle, sleep                                                  | 1/13/2024 | 16/18903  | 0.010951294173 | 0.033125964361 | 0.012995488018 | DRD2         | 1     |
| BP       | GO:0051044 | positive regulation of membrane protein ectodomain proteolysis                                   | 1/13/2024 | 16/18903  | 0.010951294173 | 0.033125964361 | 0.012995488018 | APOE         | 1     |
| BP       | GO:0060033 | anatomical structure regression                                                                  | 1/13/2024 | 16/18903  | 0.010951294173 | 0.033125964361 | 0.012995488018 | DRD2         | 1     |
| BP       | GO:0060046 | regulation of acrosome reaction                                                                  | 1/13/2024 | 16/18903  | 0.010951294173 | 0.033125964361 | 0.012995488018 | SPINK1       | 1     |
| BP       | GO:0060456 | positive regulation of digestive system process                                                  | 1/13/2024 | 16/18903  | 0.010951294173 | 0.033125964361 | 0.012995488018 | SPINK1       | 1     |
| BP       | GO:0072578 | neurotransmitter-gated ion channel clustering                                                    | 1/13/2024 | 16/18903  | 0.010951294173 | 0.033125964361 | 0.012995488018 | APOE         | 1     |
| BP       | GO:0097154 | GABAergic neuron differentiation                                                                 | 1/13/2024 | 16/18903  | 0.010951294173 | 0.033125964361 | 0.012995488018 | DRD2         | 1     |
| BP       | GO:0099170 | postsynaptic modulation of chemical synaptic transmission                                        | 1/13/2024 | 16/18903  | 0.010951294173 | 0.033125964361 | 0.012995488018 | DRD2         | 1     |
| BP       | GO:1902931 | negative regulation of alcohol biosynthetic process                                              | 1/13/2024 | 16/18903  | 0.010951294173 | 0.033125964361 | 0.012995488018 | APOE         | 1     |
| BP       | GO:1905906 | regulation of amyloid fibril formation                                                           | 1/13/2024 | 16/18903  | 0.010951294173 | 0.033125964361 | 0.012995488018 | APOE         | 1     |
| BP       | GO:2000846 | regulation of corticosteroid hormone secretion                                                   | 1/13/2024 | 16/18903  | 0.010951294173 | 0.033125964361 | 0.012995488018 | CRHR1        | 1     |
| BP       | GO:2001256 | regulation of store-operated calcium entry                                                       | 1/13/2024 | 16/18903  | 0.010951294173 | 0.033125964361 | 0.012995488018 | SPINK1       | 1     |

| ONTOLOGY | ID         | Description                                                            | GeneRatio | BgRatio   | pvalue         | p.adjust       | qvalue         | geneID        | Count |
|----------|------------|------------------------------------------------------------------------|-----------|-----------|----------------|----------------|----------------|---------------|-------|
| BP       | GO:0045088 | regulation of innate immune response                                   | 2/13/2024 | 240/18903 | 0.01141826344  | 0.034431543624 | 0.01350767355  | APOE/DRD2     | 2     |
| BP       | GO:0055089 | fatty acid homeostasis                                                 | 1/13/2024 | 17/18903  | 0.011632060476 | 0.034647177076 | 0.013592267674 | APOE          | 1     |
| BP       | GO:0055119 | relaxation of cardiac muscle                                           | 1/13/2024 | 17/18903  | 0.011632060476 | 0.034647177076 | 0.013592267674 | PDE4B         | 1     |
| BP       | GO:0060192 | negative regulation of lipase activity                                 | 1/13/2024 | 17/18903  | 0.011632060476 | 0.034647177076 | 0.013592267674 | APOC1         | 1     |
| BP       | GO:0090494 | dopamine uptake                                                        | 1/13/2024 | 17/18903  | 0.011632060476 | 0.034647177076 | 0.013592267674 | DRD2          | 1     |
| BP       | GO:0033002 | muscle cell proliferation                                              | 2/13/2024 | 247/18903 | 0.012062743507 | 0.035820463951 | 0.014052554214 | APOE/ELN      | 2     |
| BP       | GO:0043117 | positive regulation of vascular permeability                           | 1/13/2024 | 18/18903  | 0.012312394227 | 0.035996603873 | 0.014121654821 | APOE          | 1     |
| BP       | GO:0050802 | circadian sleep/wake cycle, sleep                                      | 1/13/2024 | 18/18903  | 0.012312394227 | 0.035996603873 | 0.014121654821 | DRD2          | 1     |
| BP       | GO:0051580 | regulation of neurotransmitter uptake                                  | 1/13/2024 | 18/18903  | 0.012312394227 | 0.035996603873 | 0.014121654821 | DRD2          | 1     |
| BP       | GO:0086103 | G protein-coupled receptor signaling pathway involved in heart process | 1/13/2024 | 18/18903  | 0.012312394227 | 0.035996603873 | 0.014121654821 | PDE4B         | 1     |
| BP       | GO:0090493 | catecholamine uptake                                                   | 1/13/2024 | 18/18903  | 0.012312394227 | 0.035996603873 | 0.014121654821 | DRD2          | 1     |
| BP       | GO:0060047 | heart contraction                                                      | 2/13/2024 | 250/18903 | 0.012343804614 | 0.035996603873 | 0.014121654821 | DRD2/PDE4B    | 2     |
| BP       | GO:0007625 | grooming behavior                                                      | 1/13/2024 | 19/18903  | 0.012992295676 | 0.037272288702 | 0.014622112611 | DRD2          | 1     |
| BP       | GO:0010544 | negative regulation of platelet activation                             | 1/13/2024 | 19/18903  | 0.012992295676 | 0.037272288702 | 0.014622112611 | APOE          | 1     |
| BP       | GO:0010985 | negative regulation of lipoprotein particle clearance                  | 1/13/2024 | 19/18903  | 0.012992295676 | 0.037272288702 | 0.014622112611 | APOC1         | 1     |
| BP       | GO:0035813 | regulation of renal sodium excretion                                   | 1/13/2024 | 19/18903  | 0.012992295676 | 0.037272288702 | 0.014622112611 | DRD2          | 1     |
| BP       | GO:0035930 | corticosteroid hormone secretion                                       | 1/13/2024 | 19/18903  | 0.012992295676 | 0.037272288702 | 0.014622112611 | CRHR1         | 1     |
| BP       | GO:0050708 | regulation of protein secretion                                        | 2/13/2024 | 257/18903 | 0.013010860533 | 0.037272288702 | 0.014622112611 | APOE/DRD2     | 2     |
| BP       | GO:0003015 | heart process                                                          | 2/13/2024 | 261/18903 | 0.013399062153 | 0.038265227542 | 0.01501164768  | DRD2/PDE4B    | 2     |
| BP       | GO:1903522 | regulation of blood circulation                                        | 2/13/2024 | 263/18903 | 0.013595068632 | 0.038265227542 | 0.01501164768  | DRD2/PDE4B    | 2     |
| BP       | GO:0001780 | neutrophil homeostasis                                                 | 1/13/2024 | 20/18903  | 0.013671765077 | 0.038265227542 | 0.01501164768  | PDE4B         | 1     |
| BP       | GO:0042749 | regulation of circadian sleep/wake cycle                               | 1/13/2024 | 20/18903  | 0.013671765077 | 0.038265227542 | 0.01501164768  | DRD2          | 1     |
| BP       | GO:0043691 | reverse cholesterol transport                                          | 1/13/2024 | 20/18903  | 0.013671765077 | 0.038265227542 | 0.01501164768  | APOE          | 1     |
| BP       | GO:0044794 | positive regulation by host of viral process                           | 1/13/2024 | 20/18903  | 0.013671765077 | 0.038265227542 | 0.01501164768  | APOE          | 1     |
| BP       | GO:0051004 | regulation of lipoprotein lipase activity                              | 1/13/2024 | 20/18903  | 0.013671765077 | 0.038265227542 | 0.01501164768  | APOC1         | 1     |
| BP       | GO:1900221 | regulation of amyloid-beta clearance                                   | 1/13/2024 | 20/18903  | 0.013671765077 | 0.038265227542 | 0.01501164768  | APOE          | 1     |
| BP       | GO:0002029 | desensitization of G protein-coupled receptor signaling pathway        | 1/13/2024 | 21/18903  | 0.01435080268  | 0.039373751577 | 0.015446527421 | DRD2          | 1     |
| BP       | GO:0007194 | negative regulation of adenylate cyclase activity                      | 1/13/2024 | 21/18903  | 0.01435080268  | 0.039373751577 | 0.015446527421 | DRD2          | 1     |
| BP       | GO:0021756 | striatum development                                                   | 1/13/2024 | 21/18903  | 0.01435080268  | 0.039373751577 | 0.015446527421 | DRD2          | 1     |
| BP       | GO:0022401 | negative adaptation of signaling pathway                               | 1/13/2024 | 21/18903  | 0.01435080268  | 0.039373751577 | 0.015446527421 | DRD2          | 1     |
| BP       | GO:0022410 | circadian sleep/wake cycle process                                     | 1/13/2024 | 21/18903  | 0.01435080268  | 0.039373751577 | 0.015446527421 | DRD2          | 1     |
| BP       | GO:0035812 | renal sodium excretion                                                 | 1/13/2024 | 21/18903  | 0.01435080268  | 0.039373751577 | 0.015446527421 | DRD2          | 1     |
| BP       | GO:0097062 | dendritic spine maintenance                                            | 1/13/2024 | 21/18903  | 0.01435080268  | 0.039373751577 | 0.015446527421 | APOE          | 1     |
| BP       | GO:0031348 | negative regulation of defense response                                | 2/13/2024 | 272/18903 | 0.014492717838 | 0.039651424646 | 0.015555460009 | APOE/DRD2     | 2     |
| BP       | GO:0007611 | learning or memory                                                     | 2/13/2024 | 273/18903 | 0.014594026229 | 0.039816755035 | 0.01562031998  | APOE/DRD2     | 2     |
| BP       | GO:0002115 | store-operated calcium entry                                           | 1/13/2024 | 22/18903  | 0.015029408736 | 0.040326843276 | 0.015820430249 | SPINK1        | 1     |
| BP       | GO:0035809 | regulation of urine volume                                             | 1/13/2024 | 22/18903  | 0.015029408736 | 0.040326843276 | 0.015820430249 | DRD2          | 1     |
| BP       | GO:0044062 | regulation of excretion                                                | 1/13/2024 | 22/18903  | 0.015029408736 | 0.040326843276 | 0.015820430249 | DRD2          | 1     |
| BP       | GO:0045717 | negative regulation of fatty acid biosynthetic process                 | 1/13/2024 | 22/18903  | 0.015029408736 | 0.040326843276 | 0.015820430249 | APOC1         | 1     |
| BP       | GO:0051000 | positive regulation of nitric-oxide synthase activity                  | 1/13/2024 | 22/18903  | 0.015029408736 | 0.040326843276 | 0.015820430249 | APOE          | 1     |
| BP       | GO:2000831 | regulation of steroid hormone secretion                                | 1/13/2024 | 22/18903  | 0.015029408736 | 0.040326843276 | 0.015820430249 | CRHR1         | 1     |
| BP       | GO:1903532 | positive regulation of secretion by cell                               | 2/13/2024 | 278/18903 | 0.015105246347 | 0.040418983357 | 0.015856577282 | DRD2/SPINK1   | 2     |
| BP       | GO:0014821 | phasic smooth muscle contraction                                       | 1/13/2024 | 23/18903  | 0.015707583499 | 0.041182785292 | 0.016156220751 | DRD2          | 1     |
| BP       | GO:0023058 | adaptation of signaling pathway                                        | 1/13/2024 | 23/18903  | 0.015707583499 | 0.041182785292 | 0.016156220751 | DRD2          | 1     |
| BP       | GO:0045540 | regulation of cholesterol biosynthetic process                         | 1/13/2024 | 23/18903  | 0.015707583499 | 0.041182785292 | 0.016156220751 | APOE          | 1     |
| BP       | GO:0046058 | cAMP metabolic process                                                 | 1/13/2024 | 23/18903  | 0.015707583499 | 0.041182785292 | 0.016156220751 | PDE4B         | 1     |
| BP       | GO:0048169 | regulation of long-term neuronal synaptic plasticity                   | 1/13/2024 | 23/18903  | 0.015707583499 | 0.041182785292 | 0.016156220751 | DRD2          | 1     |
| BP       | GO:0106118 | regulation of sterol biosynthetic process                              | 1/13/2024 | 23/18903  | 0.015707583499 | 0.041182785292 | 0.016156220751 | APOE          | 1     |
| BP       | GO:1900273 | positive regulation of long-term synaptic potentiation                 | 1/13/2024 | 23/18903  | 0.015707583499 | 0.041182785292 | 0.016156220751 | DRD2          | 1     |
| BP       | GO:0006874 | cellular calcium ion homeostasis                                       | 2/13/2024 | 284/18903 | 0.015728948797 | 0.041182785292 | 0.016156220751 | APOE/DRD2     | 2     |
| BP       | GO:0031280 | negative regulation of cyclase activity                                | 1/13/2024 | 24/18903  | 0.016385327218 | 0.042444969973 | 0.016651382363 | DRD2          | 1     |
| BP       | GO:0042745 | circadian sleep/wake cycle                                             | 1/13/2024 | 24/18903  | 0.016385327218 | 0.042444969973 | 0.016651382363 | DRD2          | 1     |
| BP       | GO:0051043 | regulation of membrane protein ectodomain proteolysis                  | 1/13/2024 | 24/18903  | 0.016385327218 | 0.042444969973 | 0.016651382363 | APOE          | 1     |
| BP       | GO:0051590 | positive regulation of neurotransmitter transport                      | 1/13/2024 | 24/18903  | 0.016385327218 | 0.042444969973 | 0.016651382363 | DRD2          | 1     |
| BP       | GO:0001964 | startle response                                                       | 1/13/2024 | 25/18903  | 0.017062640145 | 0.044082258623 | 0.017293699211 | DRD2          | 1     |
| BP       | GO:0006706 | steroid catabolic process                                              | 1/13/2024 | 26/18903  | 0.01773952253  | 0.045589168719 | 0.017884867875 | APOE          | 1     |
| BP       | GO:0050995 | negative regulation of lipid catabolic process                         | 1/13/2024 | 26/18903  | 0.01773952253  | 0.045589168719 | 0.017884867875 | APOC1         | 1     |
| BP       | GO:0051047 | positive regulation of secretion                                       | 2/13/2024 | 304/18903 | 0.017887537842 | 0.045716180367 | 0.017934695205 | DRD2/SPINK1   | 2     |
| BP       | GO:0051056 | regulation of small GTPase mediated signal transduction                | 2/13/2024 | 305/18903 | 0.017998643241 | 0.045716180367 | 0.017934695205 | APOE/ARHGAP15 | 2     |
| BP       | GO:0071375 | cellular response to peptide hormone stimulus                          | 2/13/2024 | 306/18903 | 0.018110048188 | 0.045716180367 | 0.017934695205 | SPINK1/CRHR1  | 2     |
| BP       | GO:0001963 | synaptic transmission, dopaminergic                                    | 1/13/2024 | 27/18903  | 0.018415974626 | 0.045716180367 | 0.017934695205 | DRD2          | 1     |
| BP       | GO:0002092 | positive regulation of receptor internalization                        | 1/13/2024 | 27/18903  | 0.018415974626 | 0.045716180367 | 0.017934695205 | DRD2          | 1     |
| BP       | GO:0010875 | positive regulation of cholesterol efflux                              | 1/13/2024 | 27/18903  | 0.018415974626 | 0.045716180367 | 0.017934695205 | APOE          | 1     |
| BP       | GO:0021544 | subpallium development                                                 | 1/13/2024 | 27/18903  | 0.018415974626 | 0.045716180367 | 0.017934695205 | DRD2          | 1     |
| BP       | GO:0021895 | cerebral cortex neuron differentiation                                 | 1/13/2024 | 27/18903  | 0.018415974626 | 0.045716180367 | 0.017934695205 | DRD2          | 1     |

| ONTOLOGY | ID         | Description                                                                                                                           | GeneRatio | BgRatio   | pvalue         | p.adjust       | qvalue         | geneID           | Count |
|----------|------------|---------------------------------------------------------------------------------------------------------------------------------------|-----------|-----------|----------------|----------------|----------------|------------------|-------|
| BP       | GO:0030325 | adrenal gland development                                                                                                             | 1/13/2024 | 27/18903  | 0.018415974626 | 0.045716180367 | 0.017934695205 | CRHR1            | 1     |
| BP       | GO:0035929 | steroid hormone secretion                                                                                                             | 1/13/2024 | 27/18903  | 0.018415974626 | 0.045716180367 | 0.017934695205 | CRHR1            | 1     |
| BP       | GO:0045745 | positive regulation of G protein-coupled receptor signaling pathway                                                                   | 1/13/2024 | 27/18903  | 0.018415974626 | 0.045716180367 | 0.017934695205 | DRD2             | 1     |
| BP       | GO:0051350 | negative regulation of lyase activity                                                                                                 | 1/13/2024 | 27/18903  | 0.018415974626 | 0.045716180367 | 0.017934695205 | DRD2             | 1     |
| BP       | GO:0051953 | negative regulation of amine transport                                                                                                | 1/13/2024 | 27/18903  | 0.018415974626 | 0.045716180367 | 0.017934695205 | DRD2             | 1     |
| BP       | GO:0055074 | calcium ion homeostasis                                                                                                               | 2/13/2024 | 309/18903 | 0.018446056349 | 0.045716180367 | 0.017934695205 | APOE/DRD2        | 2     |
| BP       | GO:0019932 | second-messenger-mediated signaling                                                                                                   | 2/13/2024 | 314/18903 | 0.019012023936 | 0.046110960928 | 0.018089569671 | APOE/SPINK1      | 2     |
| BP       | GO:0050890 | cognition                                                                                                                             | 2/13/2024 | 314/18903 | 0.019012023936 | 0.046110960928 | 0.018089569671 | APOE/DRD2        | 2     |
| BP       | GO:0002052 | positive regulation of neuroblast proliferation                                                                                       | 1/13/2024 | 28/18903  | 0.019091996682 | 0.046110960928 | 0.018089569671 | DRD2             | 1     |
| BP       | GO:0007190 | activation of adenylate cyclase activity                                                                                              | 1/13/2024 | 28/18903  | 0.019091996682 | 0.046110960928 | 0.018089569671 | CRHR1            | 1     |
| BP       | GO:0010894 | negative regulation of steroid biosynthetic process                                                                                   | 1/13/2024 | 28/18903  | 0.019091996682 | 0.046110960928 | 0.018089569671 | APOE             | 1     |
| BP       | GO:0010996 | response to auditory stimulus                                                                                                         | 1/13/2024 | 28/18903  | 0.019091996682 | 0.046110960928 | 0.018089569671 | DRD2             | 1     |
| BP       | GO:0014072 | response to isoquinoline alkaloid                                                                                                     | 1/13/2024 | 28/18903  | 0.019091996682 | 0.046110960928 | 0.018089569671 | DRD2             | 1     |
| BP       | GO:0032801 | receptor catabolic process                                                                                                            | 1/13/2024 | 28/18903  | 0.019091996682 | 0.046110960928 | 0.018089569671 | APOE             | 1     |
| BP       | GO:0035640 | exploration behavior                                                                                                                  | 1/13/2024 | 28/18903  | 0.019091996682 | 0.046110960928 | 0.018089569671 | APOE             | 1     |
| BP       | GO:0043278 | response to morphine                                                                                                                  | 1/13/2024 | 28/18903  | 0.019091996682 | 0.046110960928 | 0.018089569671 | DRD2             | 1     |
| BP       | GO:0070372 | regulation of ERK1 and ERK2 cascade                                                                                                   | 2/13/2024 | 315/18903 | 0.019126106997 | 0.046110960928 | 0.018089569671 | APOE/DRD2        | 2     |
| BP       | GO:0030431 | sleep                                                                                                                                 | 1/13/2024 | 29/18903  | 0.019767588949 | 0.047306220237 | 0.018558476111 | DRD2             | 1     |
| BP       | GO:0097254 | renal tubular secretion                                                                                                               | 1/13/2024 | 29/18903  | 0.019767588949 | 0.047306220237 | 0.018558476111 | DRD2             | 1     |
| BP       | GO:1902430 | negative regulation of amyloid-beta formation                                                                                         | 1/13/2024 | 29/18903  | 0.019767588949 | 0.047306220237 | 0.018558476111 | APOE             | 1     |
| BP       | GO:0008202 | steroid metabolic process                                                                                                             | 2/13/2024 | 323/18903 | 0.020049379886 | 0.047745956011 | 0.018730986742 | APOE/APOC1       | 2     |
| BP       | GO:0072503 | cellular divalent inorganic cation homeostasis                                                                                        | 2/13/2024 | 323/18903 | 0.020049379886 | 0.047745956011 | 0.018730986742 | APOE/DRD2        | 2     |
| BP       | GO:0015849 | organic acid transport                                                                                                                | 2/13/2024 | 324/18903 | 0.020166109163 | 0.047906805669 | 0.018794088899 | APOE/DRD2        | 2     |
| BP       | GO:0001975 | response to amphetamine                                                                                                               | 1/13/2024 | 30/18903  | 0.020442751678 | 0.048094782933 | 0.018867833356 | DRD2             | 1     |
| BP       | GO:0007271 | synaptic transmission, cholinergic                                                                                                    | 1/13/2024 | 30/18903  | 0.020442751678 | 0.048094782933 | 0.018867833356 | APOE             | 1     |
| BP       | GO:0032372 | negative regulation of sterol transport                                                                                               | 1/13/2024 | 30/18903  | 0.020442751678 | 0.048094782933 | 0.018867833356 | APOC1            | 1     |
| BP       | GO:0032375 | negative regulation of cholesterol transport                                                                                          | 1/13/2024 | 30/18903  | 0.020442751678 | 0.048094782933 | 0.018867833356 | APOC1            | 1     |
| BP       | GO:0048638 | regulation of developmental growth                                                                                                    | 2/13/2024 | 332/18903 | 0.021110424976 | 0.049206771544 | 0.019304072269 | APOE/DRD2        | 2     |
| BP       | GO:0010039 | response to iron ion                                                                                                                  | 1/13/2024 | 31/18903  | 0.021117485119 | 0.049206771544 | 0.019304072269 | DRD2             | 1     |
| BP       | GO:0040018 | positive regulation of multicellular organism growth                                                                                  | 1/13/2024 | 31/18903  | 0.021117485119 | 0.049206771544 | 0.019304072269 | DRD2             | 1     |
| BP       | GO:0045939 | negative regulation of steroid metabolic process                                                                                      | 1/13/2024 | 31/18903  | 0.021117485119 | 0.049206771544 | 0.019304072269 | APOE             | 1     |
| BP       | GO:0016042 | lipid catabolic process                                                                                                               | 2/13/2024 | 336/18903 | 0.021589530146 | 0.049824420174 | 0.019546379037 | APOE/APOC1       | 2     |
| BP       | GO:0003180 | aortic valve morphogenesis                                                                                                            | 1/13/2024 | 32/18903  | 0.021791789522 | 0.049824420174 | 0.019546379037 | ELN              | 1     |
| BP       | GO:0007628 | adult walking behavior                                                                                                                | 1/13/2024 | 32/18903  | 0.021791789522 | 0.049824420174 | 0.019546379037 | DRD2             | 1     |
| BP       | GO:0032770 | positive regulation of monooxygenase activity                                                                                         | 1/13/2024 | 32/18903  | 0.021791789522 | 0.049824420174 | 0.019546379037 | APOE             | 1     |
| BP       | GO:0048240 | sperm capacitation                                                                                                                    | 1/13/2024 | 32/18903  | 0.021791789522 | 0.049824420174 | 0.019546379037 | SPINK1           | 1     |
| BP       | GO:0050482 | arachidonic acid secretion                                                                                                            | 1/13/2024 | 32/18903  | 0.021791789522 | 0.049824420174 | 0.019546379037 | DRD2             | 1     |
| BP       | GO:0051482 | positive regulation of cytosolic calcium ion concentration involved in phospholipase C-activating G protein-coupled signaling pathway | 1/13/2024 | 32/18903  | 0.021791789522 | 0.049824420174 | 0.019546379037 | DRD2             | 1     |
| BP       | GO:1903963 | arachidonate transport                                                                                                                | 1/13/2024 | 32/18903  | 0.021791789522 | 0.049824420174 | 0.019546379037 | DRD2             | 1     |
| CC       | GO:0042627 | chylomicron                                                                                                                           | 2/13/2024 | 13/19869  | 3.07E-05       | 0.001964119997 | 0.001099174415 | APOE/APOC1       | 2     |
| CC       | GO:0034361 | very-low-density lipoprotein particle                                                                                                 | 2/13/2024 | 20/19869  | 7.46E-05       | 0.001964119997 | 0.001099174415 | APOE/APOC1       | 2     |
| CC       | GO:0034385 | triglyceride-rich plasma lipoprotein particle                                                                                         | 2/13/2024 | 20/19869  | 7.46E-05       | 0.001964119997 | 0.001099174415 | APOE/APOC1       | 2     |
| CC       | GO:0034364 | high-density lipoprotein particle                                                                                                     | 2/13/2024 | 27/19869  | 0.000137433795 | 0.002714317445 | 0.001519005099 | APOE/APOC1       | 2     |
| CC       | GO:0034358 | plasma lipoprotein particle                                                                                                           | 2/13/2024 | 36/19869  | 0.000245857972 | 0.00323712997  | 0.00181158506  | APOE/APOC1       | 2     |
| CC       | GO:1990777 | lipoprotein particle                                                                                                                  | 2/13/2024 | 36/19869  | 0.000245857972 | 0.00323712997  | 0.00181158506  | APOE/APOC1       | 2     |
| CC       | GO:0032994 | protein-lipid complex                                                                                                                 | 2/13/2024 | 39/19869  | 0.000288855797 | 0.003259943992 | 0.001824352401 | APOE/APOC1       | 2     |
| CC       | GO:0034365 | discoidal high-density lipoprotein particle                                                                                           | 1/13/2024 | 2/19869   | 0.001308175961 | 0.012918237619 | 0.007229393471 | APOE             | 1     |
| CC       | GO:0034363 | intermediate-density lipoprotein particle                                                                                             | 1/13/2024 | 4/19869   | 0.00261477208  | 0.022951888257 | 0.012844494428 | APOE             | 1     |
| CC       | GO:0071953 | elastic fiber                                                                                                                         | 1/13/2024 | 5/19869   | 0.003267478245 | 0.025813078133 | 0.014445693292 | ELN              | 1     |
| CC       | GO:0043025 | neuronal cell body                                                                                                                    | 3/13/2024 | 497/19869 | 0.00369017931  | 0.026502196864 | 0.014831342682 | APOE/DRD2/BRINP3 | 3     |
| CC       | GO:0043197 | dendritic spine                                                                                                                       | 2/13/2024 | 175/19869 | 0.005644620023 | 0.034683409853 | 0.019409769671 | DRD2/PDE4B       | 2     |
| CC       | GO:0044309 | neuron spine                                                                                                                          | 2/13/2024 | 176/19869 | 0.005707396558 | 0.034683409853 | 0.019409769671 | DRD2/PDE4B       | 2     |
| CC       | GO:0098691 | dopaminergic synapse                                                                                                                  | 1/13/2024 | 11/19869  | 0.007175442468 | 0.038931965531 | 0.02178737578  | DRD2             | 1     |
| CC       | GO:0034362 | low-density lipoprotein particle                                                                                                      | 1/13/2024 | 12/19869  | 0.007825393079 | 0.038931965531 | 0.02178737578  | APOE             | 1     |
| CC       | GO:0008021 | synaptic vesicle                                                                                                                      | 2/13/2024 | 208/19869 | 0.007884955044 | 0.038931965531 | 0.02178737578  | DRD2/PDE4B       | 2     |
| CC       | GO:0070382 | exocytic vesicle                                                                                                                      | 2/13/2024 | 226/19869 | 0.009250734703 | 0.042988708328 | 0.024057638238 | DRD2/PDE4B       | 2     |
| CC       | GO:0000930 | gamma-tubulin complex                                                                                                                 | 1/13/2024 | 16/19869  | 0.010421269914 | 0.045737795735 | 0.025596101544 | PDE4B            | 1     |
| CC       | GO:0043083 | synaptic cleft                                                                                                                        | 1/13/2024 | 18/19869  | 0.011716856008 | 0.04871745393  | 0.027263598468 | APOE             | 1     |
| MF       | GO:0060228 | phosphatidylcholine-sterol O-acyltransferase activator activity                                                                       | 2/12/2024 | 6/18432   | 5.82E-06       | 0.000465591796 | 0.000159281404 | APOE/APOC1       | 2     |
| MF       | GO:0046911 | metal chelating activity                                                                                                              | 1/12/2024 | 1/18432   | 0.000651041667 | 0.013013063638 | 0.00445183756  | APOE             | 1     |
| MF       | GO:0015056 | corticotrophin-releasing factor receptor activity                                                                                     | 1/12/2024 | 2/18432   | 0.001301694778 | 0.013013063638 | 0.00445183756  | CRHR1            | 1     |
| MF       | GO:0043404 | corticotrophin-releasing hormone receptor activity                                                                                    | 1/12/2024 | 2/18432   | 0.001301694778 | 0.013013063638 | 0.00445183756  | CRHR1            | 1     |
| MF       | GO:0045174 | glutathione dehydrogenase (ascorbate) activity                                                                                        | 1/12/2024 | 2/18432   | 0.001301694778 | 0.013013063638 | 0.00445183756  | GSTO2            | 1     |
| MF       | GO:0050610 | methylarsenate reductase activity                                                                                                     | 1/12/2024 | 2/18432   | 0.001301694778 | 0.013013063638 | 0.00445183756  | GSTO2            | 1     |
| MF       | GO:0051424 | corticotrophin-releasing hormone binding                                                                                              | 1/12/2024 | 2/18432   | 0.001301694778 | 0.013013063638 | 0.00445183756  | CRHR1            | 1     |

| ONTOLOGY | ID         | Description                                                                                          | GeneRatio | BgRatio   | pvalue         | p.adjust       | qvalue         | geneID       | Count |
|----------|------------|------------------------------------------------------------------------------------------------------|-----------|-----------|----------------|----------------|----------------|--------------|-------|
| MF       | GO:0016209 | antioxidant activity                                                                                 | 2/12/2024 | 85/18432  | 0.001346114294 | 0.013013063638 | 0.00445183756  | APOE/GSTO2   | 2     |
| MF       | GO:0001591 | dopamine neurotransmitter receptor activity, coupled via Gi/Go                                       | 1/12/2024 | 3/18432   | 0.001951959546 | 0.013013063638 | 0.00445183756  | DRD2         | 1     |
| MF       | GO:0016672 | oxidoreductase activity, acting on a sulfur group of donors, quinone or similar compound as acceptor | 1/12/2024 | 3/18432   | 0.001951959546 | 0.013013063638 | 0.00445183756  | GSTO2        | 1     |
| MF       | GO:0030613 | oxidoreductase activity, acting on phosphorus or arsenic in donors                                   | 1/12/2024 | 3/18432   | 0.001951959546 | 0.013013063638 | 0.00445183756  | GSTO2        | 1     |
| MF       | GO:0030614 | oxidoreductase activity, acting on phosphorus or arsenic in donors, disulfide as acceptor            | 1/12/2024 | 3/18432   | 0.001951959546 | 0.013013063638 | 0.00445183756  | GSTO2        | 1     |
| MF       | GO:0070326 | very-low-density lipoprotein particle receptor binding                                               | 1/12/2024 | 4/18432   | 0.00260183618  | 0.016011299566 | 0.005477549852 | APOE         | 1     |
| MF       | GO:0004952 | dopamine neurotransmitter receptor activity                                                          | 1/12/2024 | 5/18432   | 0.00325132489  | 0.017340399416 | 0.005932241905 | DRD2         | 1     |
| MF       | GO:0015038 | glutathione disulfide oxidoreductase activity                                                        | 1/12/2024 | 5/18432   | 0.00325132489  | 0.017340399416 | 0.005932241905 | GSTO2        | 1     |
| MF       | GO:0035240 | dopamine binding                                                                                     | 1/12/2024 | 7/18432   | 0.004549139386 | 0.022745696929 | 0.007781422634 | DRD2         | 1     |
| MF       | GO:0030023 | extracellular matrix constituent conferring elasticity                                               | 1/12/2024 | 9/18432   | 0.005845404714 | 0.027507786891 | 0.009410558673 | ELN          | 1     |
| MF       | GO:0097493 | structural molecule activity conferring elasticity                                                   | 1/12/2024 | 11/18432  | 0.007140122558 | 0.031733878034 | 0.010856326696 | ELN          | 1     |
| MF       | GO:0004859 | phospholipase inhibitor activity                                                                     | 1/12/2024 | 13/18432  | 0.008433294595 | 0.03373317838  | 0.011540297867 | APOC1        | 1     |
| MF       | GO:1901338 | catecholamine binding                                                                                | 1/12/2024 | 13/18432  | 0.008433294595 | 0.03373317838  | 0.011540297867 | DRD2         | 1     |
| MF       | GO:0004115 | 3',5'-cyclic-AMP phosphodiesterase activity                                                          | 1/12/2024 | 17/18432  | 0.011015007963 | 0.040054574411 | 0.013702880719 | PDE4B        | 1     |
| MF       | GO:0055102 | lipase inhibitor activity                                                                            | 1/12/2024 | 17/18432  | 0.011015007963 | 0.040054574411 | 0.013702880719 | APOC1        | 1     |
| MF       | GO:0043395 | heparan sulfate proteoglycan binding                                                                 | 1/12/2024 | 18/18432  | 0.011659472796 | 0.040554687987 | 0.013873972206 | APOE         | 1     |
| MF       | GO:0035255 | ionotropic glutamate receptor binding                                                                | 1/12/2024 | 22/18432  | 0.01423348437  | 0.042808784623 | 0.014645110529 | DRD2         | 1     |
| MF       | GO:0120020 | cholesterol transfer activity                                                                        | 1/12/2024 | 22/18432  | 0.01423348437  | 0.042808784623 | 0.014645110529 | APOE         | 1     |
| MF       | GO:0030552 | cAMP binding                                                                                         | 1/12/2024 | 23/18432  | 0.014876026368 | 0.042808784623 | 0.014645110529 | PDE4B        | 1     |
| MF       | GO:0120015 | sterol transfer activity                                                                             | 1/12/2024 | 23/18432  | 0.014876026368 | 0.042808784623 | 0.014645110529 | APOE         | 1     |
| MF       | GO:0004114 | 3',5'-cyclic-nucleotide phosphodiesterase activity                                                   | 1/12/2024 | 24/18432  | 0.015518184426 | 0.042808784623 | 0.014645110529 | PDE4B        | 1     |
| MF       | GO:0050750 | low-density lipoprotein particle receptor binding                                                    | 1/12/2024 | 24/18432  | 0.015518184426 | 0.042808784623 | 0.014645110529 | APOE         | 1     |
| MF       | GO:0004112 | cyclic-nucleotide phosphodiesterase activity                                                         | 1/12/2024 | 26/18432  | 0.016801349554 | 0.043358321429 | 0.014833109962 | PDE4B        | 1     |
| MF       | GO:0004364 | glutathione transferase activity                                                                     | 1/12/2024 | 26/18432  | 0.016801349554 | 0.043358321429 | 0.014833109962 | GSTO2        | 1     |
| MF       | GO:0070325 | lipoprotein particle receptor binding                                                                | 1/12/2024 | 29/18432  | 0.018723222902 | 0.04425847244  | 0.015141056361 | APOE         | 1     |
| MF       | GO:0042277 | peptide binding                                                                                      | 2/12/2024 | 330/18432 | 0.018734476825 | 0.04425847244  | 0.015141056361 | APOE/CRHR1   | 2     |
| MF       | GO:0071813 | lipoprotein particle binding                                                                         | 1/12/2024 | 30/18432  | 0.019363081693 | 0.04425847244  | 0.015141056361 | APOE         | 1     |
| MF       | GO:0071814 | protein-lipid complex binding                                                                        | 1/12/2024 | 30/18432  | 0.019363081693 | 0.04425847244  | 0.015141056361 | APOE         | 1     |
| MF       | GO:0031210 | phosphatidylcholine binding                                                                          | 1/12/2024 | 31/18432  | 0.020002558001 | 0.04445012889  | 0.015206623041 | APOC1        | 1     |
| MF       | GO:0043015 | gamma-tubulin binding                                                                                | 1/12/2024 | 34/18432  | 0.021918694107 | 0.047391771041 | 0.016212974304 | PDE4B        | 1     |
| MF       | GO:0015248 | sterol transporter activity                                                                          | 1/12/2024 | 36/18432  | 0.023194209572 | 0.047577865788 | 0.016276638296 | APOE         | 1     |
| MF       | GO:0043394 | proteoglycan binding                                                                                 | 1/12/2024 | 36/18432  | 0.023194209572 | 0.047577865788 | 0.016276638296 | APOE         | 1     |
| MF       | GO:0030551 | cyclic nucleotide binding                                                                            | 1/12/2024 | 37/18432  | 0.023831395345 | 0.04766279069  | 0.016305691552 | PDE4B        | 1     |
| MF       | GO:0004857 | enzyme inhibitor activity                                                                            | 2/12/2024 | 395/18432 | 0.026232182405 | 0.049184414811 | 0.016826247172 | SPINK1/APOC1 | 2     |
| MF       | GO:0050997 | quaternary ammonium group binding                                                                    | 1/12/2024 | 41/18432  | 0.026376330211 | 0.049184414811 | 0.016826247172 | APOC1        | 1     |
| MF       | GO:0035254 | glutamate receptor binding                                                                           | 1/12/2024 | 42/18432  | 0.027011612905 | 0.049184414811 | 0.016826247172 | DRD2         | 1     |
| MF       | GO:0048156 | tau protein binding                                                                                  | 1/12/2024 | 43/18432  | 0.027646515605 | 0.049184414811 | 0.016826247172 | APOE         | 1     |
| MF       | GO:0033218 | amide binding                                                                                        | 2/12/2024 | 408/18432 | 0.027858529009 | 0.049184414811 | 0.016826247172 | APOE/CRHR1   | 2     |
| MF       | GO:0015036 | disulfide oxidoreductase activity                                                                    | 1/12/2024 | 44/18432  | 0.028281038516 | 0.049184414811 | 0.016826247172 | GSTO2        | 1     |

**Supplementary Table S7. KEGG pathway enrichment**

| <b>ID</b> | <b>Description</b>                                  | <b>GeneRatio</b> | <b>BgRatio</b> | <b>pvalue</b>  | <b>p.adjust</b> | <b>qvalue</b>  | <b>geneID</b>  | <b>Count</b> |
|-----------|-----------------------------------------------------|------------------|----------------|----------------|-----------------|----------------|----------------|--------------|
| hsa04024  | cAMP signaling pathway                              | 3/8/2024         | 226/8842       | 0.000839153825 | 0.013399844332  | 0.012224419391 | 1813/1394/5142 | 3            |
| hsa04979  | Cholesterol metabolism                              | 2/8/2024         | 51/8842        | 0.000893322955 | 0.013399844332  | 0.012224419391 | 348/341        | 2            |
| hsa04080  | Neuroactive ligand-receptor interaction             | 2/8/2024         | 368/8842       | 0.040957221445 | 0.160601334993  | 0.14651349859  | 1813/1394      | 2            |
| hsa05030  | Cocaine addiction                                   | 1/8/2024         | 49/8842        | 0.043500312576 | 0.160601334993  | 0.14651349859  | 1813           | 1            |
| hsa00480  | Glutathione metabolism                              | 1/8/2024         | 58/8842        | 0.051307545797 | 0.160601334993  | 0.14651349859  | 119391         | 1            |
| hsa04730  | Long-term depression                                | 1/8/2024         | 60/8842        | 0.053034894436 | 0.160601334993  | 0.14651349859  | 1394           | 1            |
| hsa04330  | Notch signaling pathway                             | 1/8/2024         | 62/8842        | 0.054759490486 | 0.160601334993  | 0.14651349859  | 55534          | 1            |
| hsa05204  | Chemical carcinogenesis - DNA adducts               | 1/8/2024         | 71/8842        | 0.062486210142 | 0.160601334993  | 0.14651349859  | 119391         | 1            |
| hsa00982  | Drug metabolism - cytochrome P450                   | 1/8/2024         | 73/8842        | 0.064195734054 | 0.160601334993  | 0.14651349859  | 119391         | 1            |
| hsa01524  | Platinum drug resistance                            | 1/8/2024         | 75/8842        | 0.065902529744 | 0.160601334993  | 0.14651349859  | 119391         | 1            |
| hsa00980  | Metabolism of xenobiotics by cytochrome P450        | 1/8/2024         | 79/8842        | 0.069307951384 | 0.160601334993  | 0.14651349859  | 119391         | 1            |
| hsa00983  | Drug metabolism - other enzymes                     | 1/8/2024         | 81/8842        | 0.071006584786 | 0.160601334993  | 0.14651349859  | 119391         | 1            |
| hsa05032  | Morphine addiction                                  | 1/8/2024         | 91/8842        | 0.079459126302 | 0.160601334993  | 0.14651349859  | 5142           | 1            |
| hsa04540  | Gap junction                                        | 1/8/2024         | 92/8842        | 0.080300667496 | 0.160601334993  | 0.14651349859  | 1813           | 1            |
| hsa04658  | Th1 and Th2 cell differentiation                    | 1/8/2024         | 92/8842        | 0.080300667496 | 0.160601334993  | 0.14651349859  | 55534          | 1            |
| hsa04974  | Protein digestion and absorption                    | 1/8/2024         | 105/8842       | 0.091179606615 | 0.170961762403  | 0.155965116578 | 2006           | 1            |
| hsa04928  | Parathyroid hormone synthesis, secretion and action | 1/8/2024         | 115/8842       | 0.099471234343 | 0.17553747237   | 0.160139448478 | 5142           | 1            |
| hsa00230  | Purine metabolism                                   | 1/8/2024         | 128/8842       | 0.110151347355 | 0.179076567326  | 0.163368096508 | 5142           | 1            |
| hsa04728  | Dopaminergic synapse                                | 1/8/2024         | 132/8842       | 0.113415159306 | 0.179076567326  | 0.163368096508 | 1813           | 1            |
| hsa05418  | Fluid shear stress and atherosclerosis              | 1/8/2024         | 141/8842       | 0.120720464404 | 0.181080696606  | 0.165196424974 | 119391         | 1            |
| hsa04934  | Cushing syndrome                                    | 1/8/2024         | 155/8842       | 0.13197959453  | 0.188542277901  | 0.172003481594 | 1394           | 1            |
| hsa05225  | Hepatocellular carcinoma                            | 1/8/2024         | 170/8842       | 0.143902766751 | 0.19623104557   | 0.179017795958 | 119391         | 1            |
| hsa05034  | Alcoholism                                          | 1/8/2024         | 188/8842       | 0.158021215683 | 0.206114629152  | 0.188034398524 | 1813           | 1            |
| hsa04015  | Rap1 signaling pathway                              | 1/8/2024         | 212/8842       | 0.176528681382 | 0.212976281076  | 0.194294151157 | 1813           | 1            |
| hsa05207  | Chemical carcinogenesis - receptor activation       | 1/8/2024         | 215/8842       | 0.17881689494  | 0.212976281076  | 0.194294151157 | 119391         | 1            |
| hsa05208  | Chemical carcinogenesis - reactive oxygen species   | 1/8/2024         | 226/8842       | 0.187159483647 | 0.212976281076  | 0.194294151157 | 119391         | 1            |
| hsa04820  | Cytoskeleton in muscle cells                        | 1/8/2024         | 232/8842       | 0.191678652968 | 0.212976281076  | 0.194294151157 | 2006           | 1            |
| hsa05012  | Parkinson disease                                   | 1/8/2024         | 271/8842       | 0.220521093459 | 0.236272600134  | 0.215546933456 | 1813           | 1            |
| hsa05165  | Human papillomavirus infection                      | 1/8/2024         | 333/8842       | 0.264521042303 | 0.273642457555  | 0.249638733208 | 55534          | 1            |
| hsa05010  | Alzheimer disease                                   | 1/8/2024         | 391/8842       | 0.303698930153 | 0.303698930153  | 0.277058673122 | 348            | 1            |

**Supplementary Table S8. Mammalian Phenotype ontology based on pleiotropic genes**

| <b>trait</b>                       | <b>phenotype</b> | <b>p</b>      | <b>GENE</b>                       |
|------------------------------------|------------------|---------------|-----------------------------------|
| respiratory system phenotype       | MP:0005388       | 0.01691831701 | APOE,DRD2,CRHR1,ELN               |
| cardiovascular system phenotype    | MP:0005385       | 0.03063679848 | APOE,DRD2,BRINP3,CRHR1,ELN,GSTO2  |
| integument phenotype               | MP:0010771       | 0.06953635698 | APOE,DRD2,SPINK1,GSTO2            |
| taste/olfaction phenotype          | MP:0005394       | 0.08341168205 | APOE                              |
| digestive/alimentary phenotype     | MP:0005381       | 0.0976843474  | APOE,DRD2,SPINK1                  |
| liver/biliary system phenotype     | MP:0005370       | 0.10137267066 | APOE,DRD2,APOC1                   |
| skeleton phenotype                 | MP:0005390       | 0.11588861205 | APOE,DRD2,BRINP3,GSTO2            |
| nervous system phenotype           | MP:0003631       | 0.12445777565 | APOE,DRD2,CRHR1,PDE4B,ARPP21      |
| renal/urinary system phenotype     | MP:0005367       | 0.13189103852 | APOE,DRD2,BRINP3                  |
| endocrine/exocrine gland phenotype | MP:0005379       | 0.14872956456 | APOE,DRD2,SPINK1,CRHR1            |
| growth/size/body region phenotype  | MP:0005378       | 0.22200602128 | APOE,DRD2,BRINP3,SPINK1,ELN,GSTO2 |
| immune system phenotype            | MP:0005387       | 0.23117699843 | APOE,DRD2,SPINK1,PDE4B,ARHGAP15   |
| adipose tissue phenotype           | MP:0005375       | 0.23670684445 | APOE,DRD2                         |
| mortality/aging                    | MP:0010768       | 0.24360192762 | APOE,DRD2,SPINK1,CRHR1,PDE4B,ELN  |
| behavior/neurological phenotype    | MP:0005386       | 0.26372714565 | APOE,DRD2,BRINP3,CRHR1,PDE4B      |
| hematopoietic system phenotype     | MP:0005397       | 0.26545367641 | APOE,DRD2,SPINK1,PDE4B,ARHGAP15   |
| homeostasis/metabolism phenotype   | MP:0005376       | 0.32012808853 | APOE,DRD2,SPINK1,CRHR1,ELN,APOC1  |
| muscle phenotype                   | MP:0005369       | 0.32378586188 | APOE,ELN                          |
| pigmentation phenotype             | MP:0001186       | 0.32903833526 | DRD2                              |
| neoplasm                           | MP:0002006       | 0.42576047846 | DRD2                              |
| cellular phenotype                 | MP:0005384       | 0.46405559695 | APOE,DRD2,ZFAND2A,PDE4B           |
| hearing/vestibular/ear phenotype   | MP:0005377       | 0.46819578345 | APOE                              |
| limbs/digits/tail phenotype        | MP:0005371       | 0.59890162953 | DRD2                              |
| vision/eye phenotype               | MP:0005391       | 0.61230339253 | APOE,CRHR1                        |
| reproductive system phenotype      | MP:0005389       | 0.89920135148 | DRD2                              |

**Supplementary Table S9. Bliss analysis from pQTL (ARIC, Decode and UKB-PP) to MTAG-COPD (FDR < 0.05 and p\_HEIDI > 0.01)**

| chr | p0        | p1        | gene     | R2         | Zscore.classic | p.classic | beta_BLISS    | se_BLISS   | p_BLISS  | n_used_snp | n_snp | FDR        | group |
|-----|-----------|-----------|----------|------------|----------------|-----------|---------------|------------|----------|------------|-------|------------|-------|
| 5   | 131409483 | 131411859 | CSF2     | 0.00106066 | 6.34476218     | 2.23E-10  | 0.18045946808 | 0.02952918 | 9.89E-10 | 16         | 64    | 4.31E-06   | ARIC  |
| 4   | 145567173 | 145666423 | HHIP     | 0.01646128 | 6.02319584     | 1.71E-09  | 0.04663350671 | 0.00800871 | 5.79E-09 | 9          | 15    | 1.26E-05   | ARIC  |
| 1   | 161511549 | 161600917 | FCGR3A   | 0.37664882 | 5.84451904     | 5.08E-09  | 0.01522011136 | 0.00268847 | 1.50E-08 | 12         | 20    | 1.33E-05   | ARIC  |
| 10  | 105995114 | 106027217 | GSTO1    | 0.29889075 | 5.90113793     | 3.61E-09  | 0.00959679436 | 0.00167994 | 1.11E-08 | 12         | 16    | 1.33E-05   | ARIC  |
| 15  | 73344051  | 73597547  | NEO1     | 0.10946353 | -5.8420592     | 5.16E-09  | -0.0421420609 | 0.00744688 | 1.52E-08 | 6          | 15    | 1.33E-05   | ARIC  |
| 1   | 161551101 | 161648444 | FCGR2B   | 0.43271266 | -5.7348667     | 9.76E-09  | -0.026466724  | 0.00475882 | 2.67E-08 | 12         | 29    | 1.94E-05   | ARIC  |
| 1   | 161192082 | 161193421 | APOA2    | 0.002724   | -5.1615553     | 2.45E-07  | -0.0842633419 | 0.01673531 | 4.78E-07 | 65         | 183   | 0.00023639 | ARIC  |
| 3   | 49394609  | 49396033  | GPX1     | 0.01128053 | 5.19521765     | 2.04E-07  | 0.03610139878 | 0.00712589 | 4.06E-07 | 6          | 26    | 0.00023639 | ARIC  |
| 16  | 30125426  | 30134827  | MAPK3    | 0.19147276 | -5.1571596     | 2.51E-07  | -0.0384993396 | 0.00765244 | 4.88E-07 | 16         | 32    | 0.00023639 | ARIC  |
| 16  | 30434940  | 30441396  | DCTPP1   | 0.00434065 | -4.9959131     | 5.86E-07  | -0.0923114015 | 0.01891147 | 1.05E-06 | 27         | 81    | 0.00045964 | ARIC  |
| 10  | 76854192  | 76868979  | DUSP13   | 0.03780754 | -4.9269928     | 8.35E-07  | -0.0134782627 | 0.00279805 | 1.46E-06 | 37         | 102   | 0.00057757 | ARIC  |
| 3   | 49721380  | 49726934  | MST1     | 0.43147473 | 4.90250344     | 9.46E-07  | 0.01070437801 | 0.00223279 | 1.63E-06 | 13         | 40    | 0.0005935  | ARIC  |
| 2   | 31557187  | 31637581  | XDH      | 0.00218388 | 4.80613181     | 1.54E-06  | 0.05810408868 | 0.01235178 | 2.55E-06 | 83         | 196   | 0.00081297 | ARIC  |
| 14  | 42076773  | 42373752  | LRFN5    | 0.00350408 | 4.7668848      | 1.87E-06  | 0.06278118061 | 0.01345111 | 3.05E-06 | 29         | 79    | 0.00081297 | ARIC  |
| 14  | 94843084  | 94857030  | SERPINA1 | 0.19520646 | -4.7725874     | 1.82E-06  | -0.0152572014 | 0.00326518 | 2.97E-06 | 8          | 15    | 0.00081297 | ARIC  |
| 15  | 78832747  | 78841604  | PSMA4    | 0.00226279 | -4.7584918     | 1.95E-06  | -0.0712650099 | 0.01529457 | 3.17E-06 | 82         | 195   | 0.00081297 | ARIC  |
| 19  | 41223008  | 41246765  | ITPKC    | 0.0067599  | -4.7765329     | 1.78E-06  | -0.0133041534 | 0.00284496 | 2.92E-06 | 100        | 231   | 0.00081297 | ARIC  |
| 12  | 120907653 | 120936296 | DYNLL1   | 0.00200084 | -4.6067317     | 4.09E-06  | -0.0831247068 | 0.01840262 | 6.27E-06 | 55         | 118   | 0.00143927 | ARIC  |
| 16  | 29789561  | 29793096  | ZG16     | 0.00435099 | 4.61407015     | 3.95E-06  | 0.07377629422 | 0.01630809 | 6.07E-06 | 35         | 88    | 0.00143927 | ARIC  |
| 19  | 1065922   | 1086627   | HMHA1    | 0.06755086 | 4.58005264     | 4.65E-06  | 0.02869345418 | 0.00638783 | 7.06E-06 | 12         | 16    | 0.0015389  | ARIC  |
| 3   | 129033615 | 129035120 | H1FX     | 0.00080583 | -4.5665672     | 4.96E-06  | -0.0969606998 | 0.02164689 | 7.49E-06 | 45         | 107   | 0.00155557 | ARIC  |
| 6   | 43044006  | 43129457  | PTK7     | 0.03307404 | 4.535828       | 5.74E-06  | 0.0202325442  | 0.0045464  | 8.58E-06 | 59         | 123   | 0.00169993 | ARIC  |
| 14  | 65472892  | 65569413  | MAX      | 0.07487533 | -4.5121492     | 6.42E-06  | -0.0109955819 | 0.00248324 | 9.52E-06 | 20         | 41    | 0.00172858 | ARIC  |
| 20  | 62328021  | 62330037  | TNFRSF6B | 0.01363115 | -4.5158332     | 6.31E-06  | -0.0227919796 | 0.00514331 | 9.36E-06 | 121        | 246   | 0.00172858 | ARIC  |
| 5   | 176758563 | 176778853 | LMAN2    | 0.01621721 | 4.36037851     | 1.30E-05  | 0.03432164076 | 0.00801068 | 1.83E-05 | 28         | 93    | 0.00319433 | ARIC  |
| 17  | 37894180  | 37903544  | GRB7     | 0.00081572 | -4.2941254     | 1.75E-05  | -0.0455085956 | 0.01077967 | 2.42E-05 | 29         | 80    | 0.00391528 | ARIC  |
| 19  | 45409011  | 45412650  | APOE     | 0.02209145 | -4.3001171     | 1.71E-05  | -0.0271391286 | 0.00641983 | 2.36E-05 | 15         | 22    | 0.00391528 | ARIC  |
| 16  | 29817427  | 29823649  | MAZ      | 0.00302971 | -4.2664685     | 1.99E-05  | -0.1056013878 | 0.02517034 | 2.72E-05 | 27         | 74    | 0.00424023 | ARIC  |
| 1   | 38326369  | 38412729  | INPP5B   | 0.18695543 | 4.19003246     | 2.79E-05  | 0.01359213155 | 0.00329677 | 3.74E-05 | 10         | 21    | 0.00562582 | ARIC  |
| 13  | 111968531 | 111996596 | TEX29    | 0.00045209 | -4.1788553     | 2.93E-05  | -0.0522845896 | 0.0127144  | 3.92E-05 | 105        | 228   | 0.00569489 | ARIC  |
| 3   | 49924435  | 49941299  | MST1R    | 0.00247069 | 4.10747087     | 4.00E-05  | 0.10303435402 | 0.02547653 | 5.25E-05 | 12         | 51    | 0.00738146 | ARIC  |
| 5   | 147691982 | 147695485 | SPINK7   | 0.03453583 | -4.0529658     | 5.06E-05  | -0.0258721615 | 0.00648047 | 6.54E-05 | 9          | 16    | 0.00891456 | ARIC  |
| 1   | 25071848  | 25170815  | CLIC4    | 0.04789601 | -4.0207986     | 5.80E-05  | -0.0366789121 | 0.00925854 | 7.44E-05 | 11         | 15    | 0.009835   | ARIC  |

| chr | p0        | p1        | gene     | R2         | Zscore.classic | p.classic     | beta_BLISS    | se_BLISS   | p_BLISS   | n_used_snp | n_snp | FDR        | group |
|-----|-----------|-----------|----------|------------|----------------|---------------|---------------|------------|-----------|------------|-------|------------|-------|
| 19  | 45147098  | 45166850  | PVR      | 0.00467473 | 4.00610211     | 6.17E-05      | 0.02745829685 | 0.00695569 | 7.89E-05  | 89         | 234   | 0.0101227  | ARIC  |
| 5   | 131877136 | 131892530 | IL5      | 0.00034574 | 3.98661237     | 6.70E-05      | 0.13618618713 | 0.03466193 | 8.53E-05  | 3          | 16    | 0.0106266  | ARIC  |
| 3   | 119243140 | 119278449 | CD80     | 0.00297948 | -3.9763533     | 7.00E-05      | -0.0488802019 | 0.01247204 | 8.88E-05  | 76         | 171   | 0.01069846 | ARIC  |
| 17  | 60704762  | 60770958  | MRC2     | 0.0851141  | 3.9709024      | 7.16E-05      | 0.02407358556 | 0.00615068 | 9.08E-05  | 40         | 124   | 0.01069846 | ARIC  |
| 1   | 183155373 | 183214035 | LAMC2    | 0.20267532 | -3.9604009     | 7.48E-05      | -0.0092285055 | 0.0023639  | 9.46E-05  | 9          | 15    | 0.0108588  | ARIC  |
| 3   | 49061758  | 49066841  | IMPDH2   | 0.00251646 | 3.94803475     | 7.88E-05      | 0.12800373336 | 0.03288798 | 9.94E-05  | 10         | 37    | 0.01110961 | ARIC  |
| 12  | 10103915  | 10148293  | CLEC12A  | 0.4299616  | -3.9250122     | 8.67E-05      | -0.0049575043 | 0.00128098 | 0.0001088 | 27         | 68    | 0.0115693  | ARIC  |
| 12  | 10564911  | 10573194  | KLRC3    | 0.00097966 | -3.9273184     | 8.59E-05      | -0.0438108296 | 0.01131391 | 0.0001078 | 86         | 213   | 0.0115693  | ARIC  |
| 1   | 159842154 | 159869955 | CFAP45   | 0.00077139 | -3.8986609     | 9.67E-05      | -0.0234243704 | 0.00609236 | 0.0001206 | 108        | 253   | 0.01252088 | ARIC  |
| 1   | 149754227 | 150478933 | FCGR1A   | 0.00301777 | -3.870175      | 0.00010875725 | -0.0848753885 | 0.02223267 | 0.0001348 | 17         | 32    | 0.0136638  | ARIC  |
| 16  | 30064411  | 30081778  | ALDOA    | 0.00158524 | -3.860394      | 0.00011320435 | -0.1045693506 | 0.0274588  | 0.00014   | 42         | 99    | 0.01386943 | ARIC  |
| 12  | 122688090 | 122693499 | B3GNT4   | 0.00120254 | -3.8528616     | 0.00011674536 | -0.0687611584 | 0.01809023 | 0.0001441 | 41         | 114   | 0.01396243 | ARIC  |
| 11  | 43902361  | 43941816  | ALKBH3   | 0.02496311 | 3.81797838     | 0.00013454972 | 0.02839509112 | 0.00753671 | 0.0001648 | 97         | 225   | 0.01562441 | ARIC  |
| 17  | 43224684  | 43229468  | HEXIM1   | 0.01800199 | 3.72316337     | 0.00019674212 | 0.1075903339  | 0.02926397 | 0.0002364 | 7          | 15    | 0.02193104 | ARIC  |
| 15  | 101811022 | 101817705 | VIMP     | 0.00286619 | -3.7103286     | 0.00020699041 | -0.0284739805 | 0.00777084 | 0.0002481 | 155        | 350   | 0.02253436 | ARIC  |
| 22  | 50925213  | 50929077  | MIOX     | 0.00212886 | -3.7048535     | 0.0002115129  | -0.0449444969 | 0.01228345 | 0.0002533 | 94         | 189   | 0.02253436 | ARIC  |
| 15  | 65255362  | 65282648  | SPG21    | 0.00362559 | -3.6927506     | 0.00022184157 | -0.0612007085 | 0.01677968 | 0.000265  | 50         | 128   | 0.02310796 | ARIC  |
| 1   | 33116743  | 33151812  | RBBP4    | 0.00321967 | 3.68190528     | 0.00023149742 | 0.06432571575 | 0.01768706 | 0.000276  | 31         | 105   | 0.02359189 | ARIC  |
| 16  | 1840414   | 1844972   | IGFALS   | 0.01078508 | 3.65060054     | 0.00026162787 | 0.0279604336  | 0.00775223 | 0.00031   | 62         | 147   | 0.02599604 | ARIC  |
| 7   | 100770370 | 100782547 | SERPINE1 | 0.02511024 | -3.6369613     | 0.00027587341 | -0.0174348785 | 0.00485161 | 0.0003261 | 28         | 55    | 0.02682656 | ARIC  |
| 1   | 161592986 | 161601753 | FCGR3B   | 0.09571893 | 3.62819873     | 0.00028540554 | 0.01583707622 | 0.00441736 | 0.0003368 | 11         | 20    | 0.02719581 | ARIC  |
| 1   | 203181955 | 203242769 | CHIT1    | 0.34323743 | -3.6227944     | 0.00029143743 | -0.0076135212 | 0.00212669 | 0.0003436 | 12         | 15    | 0.02723882 | ARIC  |
| 1   | 117452679 | 117532980 | PTGFRN   | 0.3353817  | -3.6103739     | 0.00030575598 | -0.0047423025 | 0.00132911 | 0.0003597 | 10         | 21    | 0.02800377 | ARIC  |
| 4   | 70894130  | 70902255  | HTN3     | 0.00685211 | -3.5818221     | 0.00034120617 | -0.0415447333 | 0.0117341  | 0.0003993 | 10         | 19    | 0.03050351 | ARIC  |
| 6   | 146864829 | 146876101 | RAB32    | 0.00289285 | 3.57744648     | 0.00034696723 | 0.0597076355  | 0.01688423 | 0.0004058 | 62         | 151   | 0.03050351 | ARIC  |
| 16  | 67516474  | 67517716  | AGRP     | 0.03125857 | -3.5699704     | 0.00035702155 | -0.0119731335 | 0.0033927  | 0.000417  | 6          | 15    | 0.03081517 | ARIC  |
| 1   | 2522078   | 2564481   | MMEL1    | 0.00118976 | -3.5471644     | 0.00038940154 | -0.040953108  | 0.01167722 | 0.000453  | 111        | 232   | 0.03291997 | ARIC  |
| 3   | 20081515  | 20195896  | KAT2B    | 0.00114264 | 3.52612753     | 0.00042168385 | 0.05316716687 | 0.01524813 | 0.0004888 | 52         | 140   | 0.03446182 | ARIC  |
| 5   | 78073032  | 78281910  | ARSB     | 0.04249895 | 3.51929672     | 0.00043269248 | 0.01880458843 | 0.0054033  | 0.000501  | 8          | 15    | 0.03446182 | ARIC  |
| 20  | 62218955  | 62258394  | GMEB2    | 0.00302222 | -3.51663       | 0.00043706257 | -0.0364313423 | 0.0104759  | 0.0005059 | 123        | 244   | 0.03446182 | ARIC  |
| 22  | 50713408  | 50746056  | PLXNB2   | 0.2506377  | 3.51933684     | 0.00043262704 | 0.01920267251 | 0.00551762 | 0.000501  | 11         | 16    | 0.03446182 | ARIC  |
| 4   | 106815932 | 106925184 | NPNT     | 0.06573217 | -3.466658      | 0.00052697183 | -0.0158523771 | 0.00462252 | 0.000605  | 27         | 104   | 0.03996464 | ARIC  |
| 10  | 125425871 | 125454123 | GPR26    | 0.00267153 | -3.4701254     | 0.0005202154  | -0.016099115  | 0.00468989 | 0.0005975 | 124        | 296   | 0.03996464 | ARIC  |
| 19  | 8428173   | 8439257   | ANGPTL4  | 0.01471782 | 3.46242236     | 0.00053533635 | 0.09093731664 | 0.02654884 | 0.0006142 | 10         | 18    | 0.03996602 | ARIC  |
| 1   | 161475220 | 161493803 | FCGR2A   | 0.40236334 | -3.4381715     | 0.00058565656 | -0.0163707442 | 0.00481231 | 0.0006693 | 10         | 15    | 0.04276207 | ARIC  |
| 10  | 85980254  | 85985345  | LRIT2    | 0.00494402 | -3.4350552     | 0.00059243324 | -0.039560934  | 0.01163956 | 0.0006767 | 77         | 184   | 0.04276207 | ARIC  |

| chr | p0        | p1        | gene     | R2         | Zscore.classic | p.classic     | beta_BLISS    | se_BLISS   | p_BLISS   | n_used_snp | n_snp | FDR        | group  |
|-----|-----------|-----------|----------|------------|----------------|---------------|---------------|------------|-----------|------------|-------|------------|--------|
| 2   | 27851114  | 27874375  | GPN1     | 0.00248445 | 3.41398817     | 0.00064019355 | 0.05940389087 | 0.01758312 | 0.0007289 | 24         | 69    | 0.04476215 | ARIC   |
| 5   | 140868808 | 140892546 | PCDHGC5  | 0.00316237 | 3.41634207     | 0.00063468466 | 0.04971227914 | 0.01470456 | 0.0007229 | 72         | 190   | 0.04476215 | ARIC   |
| 16  | 69740899  | 69760854  | NQO1     | 0.16944375 | -3.3933481     | 0.00069043847 | -0.006239381  | 0.00185779 | 0.0007837 | 25         | 60    | 0.04745622 | ARIC   |
| 4   | 980785    | 998316    | IDUA     | 0.24052908 | -3.3720501     | 0.00074610878 | -0.0144233106 | 0.00432109 | 0.0008442 | 37         | 81    | 0.04948521 | ARIC   |
| 7   | 12250867  | 12282993  | TMEM106B | 0.03960972 | -3.3744492     | 0.00073963578 | -0.0187181088 | 0.00560388 | 0.0008372 | 81         | 201   | 0.04948521 | ARIC   |
| 12  | 57125380  | 57146157  | PRIM1    | 0.00280916 | 3.36966384     | 0.00075259934 | 0.03083766558 | 0.00924509 | 0.0008512 | 44         | 131   | 0.04948521 | ARIC   |
| 4   | 145567173 | 145666423 | HHIP     | 0.01256057 | 7.46574831     | 8.28E-14      | 0.082801606   | 0.01167761 | 1.34E-12  | 87         | 223   | 5.87E-09   | deCODE |
| 10  | 105995114 | 106027217 | GSTO1    | 0.28037513 | 6.42938581     | 1.28E-10      | 0.004570137   | 0.00073872 | 6.15E-10  | 96         | 238   | 1.35E-06   | deCODE |
| 16  | 30125426  | 30134827  | MAPK3    | 0.02871361 | -6.3161221     | 2.68E-10      | -0.014353456  | 0.00235857 | 1.16E-09  | 62         | 181   | 1.70E-06   | deCODE |
| 14  | 78708734  | 80330762  | NRXN3    | 0.03541141 | -6.1011362     | 1.05E-09      | -0.020637792  | 0.00350206 | 3.79E-09  | 250        | 555   | 4.17E-06   | deCODE |
| 8   | 9413424   | 9639856   | TNKS     | 0.0002605  | -5.8522464     | 4.85E-09      | -0.083290531  | 0.01469418 | 1.44E-08  | 211        | 482   | 1.27E-05   | deCODE |
| 3   | 49721380  | 49726934  | MST1     | 0.48114802 | 5.53260076     | 3.16E-08      | 0.006059023   | 0.00112686 | 7.58E-08  | 23         | 72    | 5.56E-05   | deCODE |
| 1   | 161475220 | 161493803 | FCGR2A   | 0.49699443 | -5.4744631     | 4.39E-08      | -0.005213157  | 0.00097925 | 1.02E-07  | 164        | 413   | 6.39E-05   | deCODE |
| 1   | 38326369  | 38412729  | INPP5B   | 0.02250938 | 5.03156696     | 4.86E-07      | 0.023680458   | 0.00481858 | 8.91E-07  | 192        | 450   | 0.00048978 | deCODE |
| 17  | 38171614  | 38174066  | CSF3     | 0.00118116 | 4.94257261     | 7.71E-07      | 0.085787258   | 0.01775565 | 1.35E-06  | 99         | 258   | 0.00066232 | deCODE |
| 17  | 44668035  | 44834830  | NSF      | 0.00686969 | 4.91060451     | 9.08E-07      | 0.731969818   | 0.1524387  | 1.57E-06  | 7          | 15    | 0.00069212 | deCODE |
| 1   | 161551101 | 161648444 | FCGR2B   | 0.56764825 | -4.8659439     | 1.14E-06      | -0.003100937  | 0.00065145 | 1.94E-06  | 190        | 433   | 0.00070972 | deCODE |
| 19  | 42177235  | 42212881  | CEACAM7  | 0.00078278 | -4.8837475     | 1.04E-06      | -0.120043831  | 0.02513132 | 1.78E-06  | 114        | 307   | 0.00070972 | deCODE |
| 14  | 94843084  | 94857030  | SERPINA1 | 0.12034121 | -4.7446941     | 2.09E-06      | -0.010203602  | 0.00219595 | 3.38E-06  | 288        | 595   | 0.00114233 | deCODE |
| 9   | 127962821 | 127996437 | RABEPK   | 0.00071035 | 4.70122786     | 2.59E-06      | 0.144417093   | 0.0313555  | 4.11E-06  | 95         | 231   | 0.00129136 | deCODE |
| 8   | 11351510  | 11422113  | BLK      | 0.0012239  | -4.6576141     | 3.20E-06      | -0.070677124  | 0.01548292 | 5.00E-06  | 142        | 421   | 0.00137463 | deCODE |
| 12  | 120881764 | 120884215 | TRIAP1   | 0.00055249 | 4.66359587     | 3.11E-06      | 0.060600387   | 0.01325913 | 4.87E-06  | 115        | 266   | 0.00137463 | deCODE |
| 16  | 31142756  | 31147083  | PRSS8    | 0.00529706 | 4.55920711     | 5.13E-06      | 0.062402695   | 0.01395327 | 7.74E-06  | 53         | 171   | 0.00200318 | deCODE |
| 16  | 30434940  | 30441396  | DCTPP1   | 0.00115944 | -4.5127959     | 6.40E-06      | -0.050115737  | 0.01131659 | 9.49E-06  | 53         | 166   | 0.00231935 | deCODE |
| 17  | 49707674  | 50237377  | CA10     | 0.03146852 | -4.4332631     | 9.28E-06      | -0.014382101  | 0.00330362 | 1.34E-05  | 141        | 359   | 0.00310369 | deCODE |
| 1   | 150547032 | 150552066 | MCL1     | 0.00474254 | -4.4121739     | 1.02E-05      | -0.102215124  | 0.02358722 | 1.47E-05  | 12         | 19    | 0.0031335  | deCODE |
| 5   | 130494720 | 130507428 | HINT1    | 0.00234361 | 4.40778477     | 1.04E-05      | 0.288604683   | 0.06666244 | 1.50E-05  | 9          | 23    | 0.0031335  | deCODE |
| 6   | 90036344  | 90062567  | UBE2J1   | 0.00040318 | -4.3582231     | 1.31E-05      | -0.104322603  | 0.02436052 | 1.85E-05  | 159        | 338   | 0.00353626 | deCODE |
| 12  | 121163538 | 121177811 | ACADS    | 0.00085674 | 4.35893492     | 1.31E-05      | 0.104222072   | 0.02433321 | 1.84E-05  | 116        | 272   | 0.00353626 | deCODE |
| 17  | 39032193  | 39041479  | KRT20    | 0.0032229  | 4.32574523     | 1.52E-05      | 0.06275673    | 0.01476045 | 2.12E-05  | 102        | 294   | 0.00373421 | deCODE |
| 19  | 54810571  | 54824409  | LILRA5   | 0.11054966 | -4.3260473     | 1.52E-05      | -0.00727179   | 0.00171022 | 2.12E-05  | 404        | 925   | 0.00373421 | deCODE |
| 22  | 50713408  | 50746056  | PLXNB2   | 0.10311564 | 4.28543537     | 1.82E-05      | 0.013625198   | 0.00323373 | 2.51E-05  | 228        | 434   | 0.00425588 | deCODE |
| 8   | 9911778   | 10286401  | MSRA     | 0.00125224 | -4.2677644     | 1.97E-05      | -0.05275173   | 0.01256982 | 2.71E-05  | 210        | 505   | 0.0044136  | deCODE |
| 2   | 27650657  | 27665126  | NRBP1    | 0.00115119 | 4.24247222     | 2.21E-05      | 0.093649561   | 0.02244346 | 3.01E-05  | 71         | 216   | 0.00473041 | deCODE |
| 1   | 162531323 | 162569627 | UAP1     | 0.00284274 | 4.20952096     | 2.56E-05      | 0.069665901   | 0.01682188 | 3.45E-05  | 174        | 400   | 0.0052377  | deCODE |
| 11  | 69467844  | 69490184  | ORAOV1   | 0.0010078  | -4.1796828     | 2.92E-05      | -0.070036836  | 0.01702808 | 3.91E-05  | 212        | 469   | 0.00572757 | deCODE |

| chr | p0        | p1        | gene      | R2         | Zscore.classic | p.classic   | beta_BLISS   | se_BLISS   | p_BLISS   | n_used_snp | n_snp | FDR        | group  |
|-----|-----------|-----------|-----------|------------|----------------|-------------|--------------|------------|-----------|------------|-------|------------|--------|
| 8   | 67088620  | 67090960  | CRH       | 0.00105788 | -4.1317898     | 3.60E-05    | -0.093029817 | 0.0228718  | 4.75E-05  | 70         | 193   | 0.0066221  | deCODE |
| 10  | 82167585  | 82192753  | FAM213A   | 0.00539459 | 4.12856683     | 3.65E-05    | 0.045110327  | 0.01109895 | 4.82E-05  | 156        | 368   | 0.0066221  | deCODE |
| 1   | 161592986 | 161601753 | FCGR3B    | 0.08006167 | 4.10447234     | 4.05E-05    | 0.007991254  | 0.00197733 | 5.31E-05  | 170        | 410   | 0.00690819 | deCODE |
| 2   | 56093102  | 56151274  | EFEMP1    | 0.01764919 | -4.0892055     | 4.33E-05    | -0.013580606 | 0.00337249 | 5.65E-05  | 109        | 271   | 0.00690819 | deCODE |
| 5   | 131527531 | 131631008 | P4HA2     | 0.00030749 | -4.1012445     | 4.11E-05    | -0.140300428 | 0.03474199 | 5.38E-05  | 57         | 179   | 0.00690819 | deCODE |
| 7   | 99815864  | 99819113  | PVRIG     | 0.00065628 | -4.090355      | 4.31E-05    | -0.15363381  | 0.03814168 | 5.63E-05  | 62         | 175   | 0.00690819 | deCODE |
| 15  | 73344051  | 73597547  | NEO1      | 0.02111355 | -4.0615636     | 4.87E-05    | -0.016634484 | 0.00415807 | 6.32E-05  | 95         | 232   | 0.00751584 | deCODE |
| 1   | 157800704 | 157868046 | CD5L      | 0.04154536 | -3.9426009     | 8.06E-05    | -0.020203647 | 0.00519786 | 0.0001015 | 148        | 377   | 0.01145417 | deCODE |
| 1   | 203181955 | 203242769 | CHIT1     | 0.35170139 | -3.9442005     | 8.01E-05    | -0.002539671 | 0.00065313 | 0.0001009 | 177        | 399   | 0.01145417 | deCODE |
| 7   | 136912088 | 137028611 | PTN       | 0.03115742 | -3.9192561     | 8.88E-05    | -0.019973241 | 0.00516828 | 0.0001113 | 169        | 407   | 0.01224057 | deCODE |
| 5   | 43376747  | 43412493  | CCL28     | 0.00231337 | -3.9072994     | 9.33E-05    | -0.07780654  | 0.020193   | 0.0001166 | 59         | 149   | 0.01250051 | deCODE |
| 16  | 1840414   | 1844972   | IGFALS    | 0.04414952 | 3.90141672     | 9.56E-05    | 0.014606732  | 0.00379641 | 0.0001193 | 183        | 476   | 0.01250051 | deCODE |
| 2   | 27851114  | 27874375  | GPN1      | 0.0021355  | 3.88863974     | 0.000100808 | 0.070135658  | 0.01828697 | 0.0001254 | 99         | 254   | 0.01283377 | deCODE |
| 19  | 39390340  | 39399533  | NFKBIB    | 0.00026627 | 3.88180566     | 0.000103684 | 0.042965662  | 0.01122189 | 0.0001288 | 152        | 374   | 0.01288027 | deCODE |
| 7   | 99564343  | 99573780  | AZGP1     | 0.02214059 | -3.8493097     | 0.000118451 | -0.015188309 | 0.00399944 | 0.0001461 | 44         | 137   | 0.01428537 | deCODE |
| 8   | 27092840  | 27115937  | STMN4     | 0.00059216 | 3.83473074     | 0.000125702 | 0.089525634  | 0.0236613  | 0.0001546 | 181        | 383   | 0.01439579 | deCODE |
| 8   | 22877646  | 22926692  | TNFRSF10B | 0.00061807 | -3.836034      | 0.000125037 | -0.071742028 | 0.0189549  | 0.0001538 | 242        | 518   | 0.01439579 | deCODE |
| 11  | 57154267  | 57158130  | PRG2      | 0.00153263 | -3.8305837     | 0.00012784  | -0.033501963 | 0.00886376 | 0.000157  | 56         | 166   | 0.01439579 | deCODE |
| 12  | 48498922  | 48540187  | PFKM      | 0.01535543 | 3.81499672     | 0.000136185 | 0.019045183  | 0.00505887 | 0.0001667 | 135        | 305   | 0.0149728  | deCODE |
| 14  | 65472892  | 65569413  | MAX       | 0.01645647 | -3.8042703     | 0.000142223 | -0.023058699 | 0.00614175 | 0.0001737 | 112        | 266   | 0.01528933 | deCODE |
| 19  | 54799506  | 54809979  | LILRA3    | 0.4150661  | -3.7750756     | 0.000159959 | -0.001764027 | 0.00047339 | 0.0001942 | 451        | 972   | 0.01675705 | deCODE |
| 1   | 26856252  | 26901521  | RPS6KA1   | 0.00762485 | 3.69069245     | 0.000223644 | 0.040335739  | 0.01106504 | 0.000267  | 78         | 227   | 0.02181296 | deCODE |
| 2   | 62900986  | 63273622  | EHBP1     | 0.00121095 | -3.6779375     | 0.000235128 | -0.093163088 | 0.02564312 | 0.0002801 | 74         | 200   | 0.02181296 | deCODE |
| 4   | 100044808 | 100078949 | ADH4      | 0.00561366 | -3.6792384     | 0.000233931 | -0.0409282   | 0.0112616  | 0.0002787 | 93         | 257   | 0.02181296 | deCODE |
| 7   | 100770370 | 100782547 | SERPINE1  | 0.00816168 | -3.6804823     | 0.000232793 | -0.02830474  | 0.00778563 | 0.0002774 | 113        | 289   | 0.02181296 | deCODE |
| 16  | 29674600  | 29710020  | QPRT      | 0.00056538 | -3.6895984     | 0.000224608 | -0.137971539 | 0.03785976 | 0.0002681 | 71         | 197   | 0.02181296 | deCODE |
| 19  | 54777075  | 54785039  | LILRB2    | 0.30629153 | -3.675553      | 0.000237335 | -0.002452652 | 0.00067552 | 0.0002826 | 438        | 969   | 0.02181296 | deCODE |
| 19  | 1065922   | 1086627   | HMHA1     | 0.01064019 | 3.67013823     | 0.000242419 | 0.029369628  | 0.00810071 | 0.0002883 | 376        | 912   | 0.02187371 | deCODE |
| 16  | 29817427  | 29823649  | MAZ       | 0.00056017 | -3.6605843     | 0.000251641 | -0.070378219 | 0.01946102 | 0.0002988 | 67         | 184   | 0.02228082 | deCODE |
| 16  | 29882480  | 29910868  | SEZ6L2    | 0.00071671 | -3.6546446     | 0.000257538 | -0.09401361  | 0.02603785 | 0.0003054 | 71         | 200   | 0.02239808 | deCODE |
| 16  | 31227283  | 31228680  | PYDC1     | 0.00075652 | 3.63236876     | 0.000280831 | 0.115370957  | 0.03214384 | 0.0003317 | 50         | 178   | 0.02392472 | deCODE |
| 17  | 43238067  | 43247407  | HEXIM2    | 0.00485761 | 3.60165769     | 0.000316195 | 0.0365276    | 0.01026163 | 0.0003714 | 95         | 239   | 0.026356   | deCODE |
| 6   | 43044006  | 43129457  | PTK7      | 0.00843106 | 3.59410532     | 0.000325508 | 0.026819401  | 0.00754976 | 0.0003818 | 207        | 435   | 0.02666574 | deCODE |
| 2   | 70484518  | 70508323  | PCYOX1    | 0.14522391 | -3.5896551     | 0.000331116 | -0.014077329 | 0.00396761 | 0.0003881 | 49         | 88    | 0.02668022 | deCODE |
| 1   | 175284330 | 175712906 | TNR       | 0.01301313 | -3.5732983     | 0.000352513 | -0.037143433 | 0.01051538 | 0.000412  | 128        | 304   | 0.02686315 | deCODE |
| 11  | 43380482  | 43516483  | TTC17     | 0.00073274 | -3.5711818     | 0.000355374 | -0.063860842 | 0.01808958 | 0.0004152 | 167        | 371   | 0.02686315 | deCODE |

| chr | p0        | p1        | gene     | R2         | Zscore.classic | p.classic   | beta_BLISS   | se_BLISS   | p_BLISS   | n_used_snp | n_snp | FDR        | group  |
|-----|-----------|-----------|----------|------------|----------------|-------------|--------------|------------|-----------|------------|-------|------------|--------|
| 13  | 38136720  | 38172981  | POSTN    | 0.04511896 | 3.58102979     | 0.000342243 | 0.010279178  | 0.00290393 | 0.0004005 | 138        | 317   | 0.02686315 | deCODE |
| 17  | 41843489  | 41856356  | DUSP3    | 0.00059493 | -3.5739272     | 0.000351667 | -0.105060344 | 0.02973768 | 0.000411  | 70         | 221   | 0.02686315 | deCODE |
| 8   | 61591337  | 61779465  | CHD7     | 0.00154055 | 3.56092706     | 0.000369548 | 0.072315861  | 0.02054213 | 0.0004309 | 116        | 309   | 0.02748073 | deCODE |
| 6   | 34204650  | 34214008  | HMGA1    | 0.00044262 | -3.5430161     | 0.000395579 | -0.296432175 | 0.08462011 | 0.0004599 | 10         | 305   | 0.02890723 | deCODE |
| 17  | 18231187  | 18266856  | SHMT1    | 0.18807879 | 3.53057836     | 0.000414652 | 0.003892061  | 0.00111485 | 0.000481  | 75         | 210   | 0.02981137 | deCODE |
| 1   | 196788887 | 196801319 | CFHR1    | 0.18594634 | 3.52664681     | 0.000420858 | 0.00403208   | 0.00115622 | 0.0004879 | 64         | 171   | 0.02981753 | deCODE |
| 7   | 37945543  | 38065297  | SFRP4    | 0.01987096 | -3.5218543     | 0.00042854  | -0.083227104 | 0.02389746 | 0.0004964 | 11         | 19    | 0.02992181 | deCODE |
| 3   | 120347020 | 120401418 | HGD      | 0.00912216 | -3.5113342     | 0.000445863 | -0.027776346 | 0.0079989  | 0.0005156 | 86         | 209   | 0.03065692 | deCODE |
| 11  | 63304281  | 63313934  | RARRES3  | 0.00096378 | 3.50759945     | 0.000452169 | 0.112526907  | 0.03243863 | 0.0005226 | 98         | 239   | 0.03065699 | deCODE |
| 1   | 161154098 | 161168846 | ADAMTS4  | 0.00216295 | 3.49122486     | 0.000480811 | 0.06779579   | 0.01963328 | 0.0005542 | 147        | 377   | 0.03208356 | deCODE |
| 16  | 2059927   | 2070756   | NPW      | 0.06592836 | 3.48659615     | 0.00048921  | 0.010198603  | 0.00295729 | 0.0005634 | 184        | 516   | 0.03219573 | deCODE |
| 11  | 1773982   | 1785222   | CTSD     | 0.05022444 | 3.47660269     | 0.00050781  | 0.009803079  | 0.00285057 | 0.0005839 | 248        | 612   | 0.03293807 | deCODE |
| 16  | 31445569  | 31454346  | ZNF843   | 0.00011948 | 3.46169069     | 0.000536794 | 0.174274973  | 0.05088949 | 0.0006158 | 52         | 162   | 0.03429533 | deCODE |
| 2   | 27321757  | 27341995  | CGREF1   | 0.00084135 | 3.45748707     | 0.000545238 | 0.051017325  | 0.0149151  | 0.000625  | 62         | 200   | 0.03437645 | deCODE |
| 15  | 63613577  | 63674360  | CA12     | 0.00216128 | 3.44243676     | 0.000576499 | 0.029392579  | 0.00862973 | 0.0006593 | 141        | 359   | 0.03581361 | deCODE |
| 10  | 5454514   | 5500426   | NET1     | 0.00185289 | 3.43873175     | 0.000584446 | 0.053957647  | 0.01585876 | 0.000668  | 315        | 667   | 0.03584379 | deCODE |
| 17  | 40688190  | 40696467  | NAGLU    | 0.17485892 | 3.43326992     | 0.000596348 | 0.007473222  | 0.00219988 | 0.000681  | 30         | 74    | 0.03610238 | deCODE |
| 6   | 2988221   | 3019996   | NQO2     | 0.38854182 | 3.42068004     | 0.000624648 | 0.007633706  | 0.0022552  | 0.000712  | 250        | 571   | 0.0371438  | deCODE |
| 7   | 12250867  | 12282993  | TMEM106B | 0.00650536 | -3.4184569     | 0.000629773 | -0.027870203 | 0.00823884 | 0.0007176 | 182        | 434   | 0.0371438  | deCODE |
| 8   | 11839830  | 11842099  | DEFB135  | 0.00067716 | -3.3899077     | 0.000699161 | -0.064173195 | 0.01912668 | 0.0007932 | 141        | 420   | 0.04058093 | deCODE |
| 9   | 133971863 | 133998539 | AIF1L    | 0.13712654 | -3.371686      | 0.000747096 | -0.004847272 | 0.00145235 | 0.0008453 | 217        | 431   | 0.04274893 | deCODE |
| 3   | 129693148 | 129696781 | TRH      | 0.00122232 | -3.358438      | 0.000783843 | -0.074897919 | 0.02252769 | 0.0008851 | 88         | 233   | 0.044256   | deCODE |
| 16  | 69740899  | 69760854  | NQO1     | 0.2016311  | -3.352841      | 0.000799866 | -0.003718863 | 0.00112038 | 0.0009025 | 62         | 183   | 0.04461699 | deCODE |
| 2   | 76974845  | 77820445  | LRRTM4   | 0.00346906 | -3.3340763     | 0.000855832 | -0.047828352 | 0.01448856 | 0.000963  | 186        | 439   | 0.04507778 | deCODE |
| 5   | 78073032  | 78281910  | ARSB     | 0.01036016 | 3.34329634     | 0.000827894 | 0.022087723  | 0.00667294 | 0.0009328 | 185        | 399   | 0.04507778 | deCODE |
| 7   | 100487615 | 100494594 | ACHE     | 0.00100573 | -3.3345891     | 0.000854255 | -0.072995228 | 0.02210899 | 0.0009613 | 116        | 275   | 0.04507778 | deCODE |
| 12  | 62654119  | 62811211  | USP15    | 0.01512445 | 3.33551738     | 0.000851408 | 0.015629952  | 0.00473275 | 0.0009582 | 173        | 358   | 0.04507778 | deCODE |
| 16  | 71559136  | 71572649  | CHST4    | 0.00324434 | 3.34005967     | 0.000837604 | 0.319856044  | 0.09672362 | 0.0009433 | 10         | 19    | 0.04507778 | deCODE |
| 2   | 173420101 | 173489823 | PDK1     | 0.01549002 | -3.3155103     | 0.00091476  | -0.016962001 | 0.00516642 | 0.0010266 | 188        | 438   | 0.04730571 | deCODE |
| 10  | 115999018 | 116051272 | VWA2     | 0.05470199 | -3.3139592     | 0.000919849 | -0.024361832 | 0.00742372 | 0.0010321 | 124        | 289   | 0.04730571 | deCODE |
| 1   | 9005926   | 9035151   | CA6      | 0.18998875 | 3.29511627     | 0.00098381  | 0.004395401  | 0.0013469  | 0.001101  | 184        | 422   | 0.04988181 | deCODE |
| 8   | 8993765   | 9009084   | PPP1R3B  | 0.00109217 | 3.28993197     | 0.001002116 | 0.022615285  | 0.00694076 | 0.0011207 | 149        | 379   | 0.04988181 | deCODE |
| 22  | 51061182  | 51066607  | ARSA     | 0.00417026 | 3.28950324     | 0.001003644 | 0.016965061  | 0.00520734 | 0.0011223 | 148        | 289   | 0.04988181 | deCODE |
| 8   | 27348296  | 27403081  | EPHX2    | 0.007671   | -7.121832      | 1.07E-12    | -0.233868502 | 0.03441994 | 1.09E-11  | 11         | 15    | 1.51E-08   | UKB-PP |
| 17  | 38171614  | 38174066  | CSF3     | 0.00419646 | 6.08314548     | 1.18E-09    | 0.099595518  | 0.01694709 | 4.18E-09  | 96         | 262   | 2.90E-06   | UKB-PP |
| 16  | 30194148  | 30200397  | CORO1A   | 0.00062178 | -5.8155911     | 6.04E-09    | -0.167056603 | 0.02964622 | 1.75E-08  | 44         | 138   | 8.10E-06   | UKB-PP |

| chr | p0        | p1        | gene     | R2         | Zscore.classic | p.classic   | beta_BLISS   | se_BLISS   | p_BLISS   | n_used_snp | n_snp | FDR        | group  |
|-----|-----------|-----------|----------|------------|----------------|-------------|--------------|------------|-----------|------------|-------|------------|--------|
| 8   | 9911778   | 10286401  | MSRA     | 0.00195254 | -5.0585289     | 4.23E-07    | -0.384145932 | 0.07777064 | 7.83E-07  | 12         | 16    | 0.00027182 | UKB-PP |
| 20  | 62328021  | 62330037  | TNFRSF6B | 0.06474243 | -4.9722027     | 6.62E-07    | -0.023792879 | 0.0048965  | 1.18E-06  | 41         | 84    | 0.00032725 | UKB-PP |
| 1   | 161475220 | 161493803 | FCGR2A   | 0.30766302 | -4.8542829     | 1.21E-06    | -0.006665108 | 0.00140344 | 2.04E-06  | 15         | 29    | 0.00047258 | UKB-PP |
| 3   | 49506146  | 49573048  | DAG1     | 0.00196442 | -4.6281597     | 3.69E-06    | -0.079880449 | 0.01760583 | 5.70E-06  | 17         | 61    | 0.00113057 | UKB-PP |
| 17  | 43298811  | 43324687  | FMNL1    | 0.00031224 | 4.3782673      | 1.20E-05    | 0.104878626  | 0.02438232 | 1.70E-05  | 83         | 214   | 0.00294441 | UKB-PP |
| 7   | 99965153  | 99997719  | PILRA    | 0.43587521 | -4.2522643     | 2.12E-05    | -0.023814162 | 0.00569446 | 2.89E-05  | 5          | 16    | 0.00445662 | UKB-PP |
| 1   | 161040788 | 161059348 | NECTIN4  | 0.03517472 | 4.1961619      | 2.71E-05    | 0.062113237  | 0.0150443  | 3.65E-05  | 8          | 15    | 0.00464468 | UKB-PP |
| 7   | 99933737  | 99965356  | PILRB    | 0.58975676 | -4.1940118     | 2.74E-05    | -0.006445218 | 0.00156185 | 3.68E-05  | 9          | 16    | 0.00464468 | UKB-PP |
| 5   | 147582357 | 147594700 | SPINK6   | 0.05909043 | -4.1013113     | 4.11E-05    | -0.012525743 | 0.00310165 | 5.38E-05  | 89         | 198   | 0.00622438 | UKB-PP |
| 5   | 35852797  | 35879705  | IL7R     | 0.25083238 | 4.06166283     | 4.87E-05    | 0.00902764   | 0.00225656 | 6.32E-05  | 8          | 15    | 0.00674526 | UKB-PP |
| 6   | 43193367  | 43197222  | DNPH1    | 0.05188943 | -4.0122892     | 6.01E-05    | -0.014043543 | 0.00355217 | 7.70E-05  | 38         | 77    | 0.00763536 | UKB-PP |
| 16  | 30434940  | 30441396  | DCTPP1   | 0.00424113 | -3.9159589     | 9.00E-05    | -0.103754477 | 0.02686944 | 0.0001127 | 9          | 15    | 0.01043082 | UKB-PP |
| 14  | 65472892  | 65569413  | MAX      | 0.00419031 | -3.8501861     | 0.000118028 | -0.045870941 | 0.01207624 | 0.0001456 | 18         | 32    | 0.01202094 | UKB-PP |
| 16  | 29882480  | 29910868  | SEZ6L2   | 0.02248383 | 3.84731552     | 0.000119419 | 0.016121498  | 0.00424731 | 0.0001472 | 35         | 110   | 0.01202094 | UKB-PP |
| 5   | 78073032  | 78281910  | ARSB     | 0.0533416  | 3.75530922     | 0.000173128 | 0.014757026  | 0.0039804  | 0.0002094 | 161        | 380   | 0.01494914 | UKB-PP |
| 6   | 14117872  | 14137149  | CD83     | 0.01942426 | -3.7563595     | 0.000172403 | -0.023633859 | 0.006373   | 0.0002085 | 153        | 394   | 0.01494914 | UKB-PP |
| 9   | 5510545   | 5571282   | PDCD1LG2 | 0.17326777 | 3.74781284     | 0.000178383 | 0.004391196  | 0.00118674 | 0.0002154 | 96         | 213   | 0.01494914 | UKB-PP |
| 12  | 122326637 | 122356203 | PSMD9    | 0.01678363 | 3.64616172     | 0.000266186 | 0.046045898  | 0.0127817  | 0.0003152 | 23         | 61    | 0.02083235 | UKB-PP |
| 1   | 155023042 | 155035252 | ADAM15   | 0.30539533 | -3.6250844     | 0.000288867 | -0.022064358 | 0.00615945 | 0.0003407 | 8          | 16    | 0.02149637 | UKB-PP |
| 19  | 54810571  | 54824409  | LILRA5   | 0.06921307 | -3.6012526     | 0.000316688 | -0.029089812 | 0.00817305 | 0.0003719 | 9          | 15    | 0.0224453  | UKB-PP |
| 11  | 60869867  | 60895324  | CD5      | 0.01627518 | 3.5875914      | 0.000333747 | 0.026030608  | 0.00734068 | 0.000391  | 111        | 295   | 0.0226138  | UKB-PP |
| 2   | 27321757  | 27341995  | CGREF1   | 0.15625119 | -3.564397      | 0.000364694 | -0.007295021 | 0.00207027 | 0.0004255 | 15         | 42    | 0.02362613 | UKB-PP |
| 19  | 40953696  | 40971747  | BLVRB    | 0.0085936  | 3.51665018     | 0.000437029 | 0.028550417  | 0.00820968 | 0.0005058 | 154        | 375   | 0.02700327 | UKB-PP |
| 22  | 37521878  | 37571094  | IL2RB    | 0.00122191 | -3.4703232     | 0.000519832 | -0.073412253 | 0.0213848  | 0.0005971 | 210        | 497   | 0.03069656 | UKB-PP |
| 17  | 72690452  | 72709117  | CD300LF  | 0.39758878 | -3.3701404     | 0.000751299 | -0.00423214  | 0.00126861 | 0.0008498 | 15         | 23    | 0.04212704 | UKB-PP |
| 5   | 31193857  | 31329253  | CDH6     | 0.20653323 | 3.3042347      | 0.000952361 | 0.014741477  | 0.00450507 | 0.0010672 | 26         | 43    | 0.04540187 | UKB-PP |
| 10  | 70042417  | 70092806  | PBLD     | 0.10201905 | 3.30809032     | 0.000939345 | 0.011683152  | 0.00356636 | 0.0010531 | 8          | 15    | 0.04540187 | UKB-PP |
| 10  | 118380352 | 118404654 | PNLIPRP2 | 0.27901463 | 3.31771208     | 0.00090758  | 0.006502009  | 0.00197915 | 0.0010189 | 28         | 92    | 0.04540187 | UKB-PP |
| 12  | 53342655  | 53346685  | KRT18    | 0.00138405 | 3.33396526     | 0.000856174 | 0.071397005  | 0.02162888 | 0.0009634 | 134        | 336   | 0.04540187 | UKB-PP |
| 19  | 54597922  | 54606000  | OSCAR    | 0.26998249 | -3.3008956     | 0.000963767 | -0.01045777  | 0.00319911 | 0.0010794 | 45         | 101   | 0.04540187 | UKB-PP |
| 7   | 22765503  | 22771621  | IL6      | 0.00170465 | 3.26668158     | 0.00108816  | 0.05560684   | 0.01718497 | 0.0012131 | 184        | 372   | 0.04677149 | UKB-PP |
| 8   | 90945564  | 91015456  | NBN      | 0.00213801 | 3.2725094      | 0.001065973 | 0.032830077  | 0.01012825 | 0.0011893 | 62         | 182   | 0.04677149 | UKB-PP |
| 16  | 31271311  | 31344213  | ITGAM    | 0.01381186 | -3.2764292     | 0.001051287 | -0.111630451 | 0.03439824 | 0.0011735 | 7          | 16    | 0.04677149 | UKB-PP |

Supplementary Table S10: Drug-Gene Interaction Network of Pleiotropic Genes in COPD-GI Comorbidity

| gene  | drug                          | regulatory approval | indication                                                                                                                      | interaction score |
|-------|-------------------------------|---------------------|---------------------------------------------------------------------------------------------------------------------------------|-------------------|
| MAML3 | PERPHENAZINE                  | Approved            | Antipsychotic Agents                                                                                                            | 4.039051634       |
| APOE  | GANCICLOVIR                   | Approved            |                                                                                                                                 | 0.226326169       |
| APOE  | IRBESARTAN                    | Approved            | antihypertensive agent                                                                                                          | 0.226326169       |
| APOE  | NICOTINE POLACRILEX           | Approved            | Central Nervous System Stimulants                                                                                               | 0.039361073       |
| APOE  | FENOFIBRATE MICRONIZED        | Approved            | anticholesterolaemic agent,antidyslipidaemic agent                                                                              | 0.069638821       |
| APOE  | PRAVASTATIN SODIUM            | Approved            | anticholesterolaemic agent,antihypercholesterolemic agent                                                                       | 0.134119211       |
| APOE  | GINKGO BILOBA EXTRACT         | Approved            |                                                                                                                                 | 0.362121871       |
| APOE  | HUMAN CHORIONIC GONADOTROPIN  | Approved            |                                                                                                                                 | 0.095295229       |
| APOE  | RITONAVIR                     | Approved            |                                                                                                                                 | 0.100589408       |
| APOE  | DONEPEZIL                     | Approved            | for treatment of alzheimer's disease                                                                                            | 0.339489254       |
| APOE  | LECANEMAB                     | Approved            |                                                                                                                                 | 0.452652338       |
| APOE  | LORAZEPAM                     | Approved            | Anti-anxiety Agents; Anticonvulsants; Hypnotics and Sedatives                                                                   | 0.072424374       |
| APOE  | RIVASTIGMINE                  | Approved            | for treatment of Alzheimer's disease                                                                                            | 0.258658479       |
| APOE  | SOYBEAN SEED OIL              | Approved            |                                                                                                                                 | 0.362121871       |
| APOE  | BUPROPION HYDROCHLORIDE       | Approved            | smoking-cessation agent,appetite suppressant,antidepressant                                                                     | 0.106506433       |
| APOE  | TROGLITAZONE                  | Approved            |                                                                                                                                 | 0.069638821       |
| APOE  | NORETHINDRONE ACETATE         | Approved            |                                                                                                                                 | 0.301768225       |
| APOE  | LUTEIN                        | Approved            |                                                                                                                                 | 0.905304676       |
| APOE  | TRIAMCINOLONE                 | Approved            | for treatment of diabetic macular edema                                                                                         | 0.078722146       |
| APOE  | FLUVASTATIN                   | Approved            | antihypercholesterolemic agent                                                                                                  | 0.226326169       |
| APOE  | PREDNISONE                    | Approved            | corticosteroid,antiinflammatory agent                                                                                           | 0.042107194       |
| APOE  | GALANTAMINE                   | Approved            | for treatment of alzheimer's disease                                                                                            | 0.226326169       |
| APOE  | VITAMIN E                     | Approved            |                                                                                                                                 | 0.113163085       |
| APOE  | TRETINOIN                     | Approved            | for treatment of acne                                                                                                           | 0.019896806       |
| DRD2  | CABERGOLINE                   | Approved            | Antiparkinson Agents                                                                                                            | 0.077827576       |
| DRD2  | PROMAZINE                     | Approved            | Antiemetics; Antipsychotic Agents                                                                                               | 0.021846337       |
| DRD2  | BREXPIPRAZOLE                 | Approved            | antidepressant                                                                                                                  | 0.088945801       |
| DRD2  | REMOXIPRIDE                   | Approved            | Antipsychotic Agents                                                                                                            | 0.103770101       |
| DRD2  | SULPIRIDE                     | Approved            | Second-Generation; Antipsychotic Agents,Antidepressive Agents                                                                   | 0.088945801       |
| DRD2  | LEVODOPA                      | Approved            | antiparkinson agent                                                                                                             | 0.017295017       |
| DRD2  | LENVATINIB                    | Approved            | antineoplastic agent                                                                                                            | 0.011530011       |
| DRD2  | LOXAPINE                      | Approved            | antipsychotic agent                                                                                                             | 0.063858524       |
| DRD2  | THIORIDAZINE                  | Approved            | Antipsychotic Agents                                                                                                            | 0.028626235       |
| DRD2  | MOLINDONE                     | Approved            | Antipsychotic Agents                                                                                                            | 0.138360135       |
| DRD2  | PROCHLORPERAZINE              | Approved            | antiemetic,antimigraine agent                                                                                                   | 0.0296486         |
| DRD2  | DROPERIDOL                    | Approved            | Anesthesia,Adjuncts                                                                                                             | 0.138360135       |
| DRD2  | HALOPERIDOL DECANOATE         | Approved            | Antipsychotic Agents                                                                                                            | 0.021846337       |
| DRD2  | TRIFLUPROMAZINE               | Approved            | Antiemetics; Antipsychotic Agents                                                                                               | 0.077827576       |
| DRD2  | PIMOZIDE                      | Approved            | Antidyskinetics; Antipsychotic Agents                                                                                           | 0.024416494       |
| DRD2  | IOPERIDONE                    | Approved            | atypical,antipsychotic agent                                                                                                    | 0.039531467       |
| DRD2  | BROMPERIDOL                   | Approved            |                                                                                                                                 | 0.622620608       |
| DRD2  | FLUPHENAZINE HYDROCHLORIDE    | Approved            | Antipsychotic Agents                                                                                                            | 0.028300937       |
| DRD2  | DOPAMINE                      | Approved            |                                                                                                                                 | 0.007156559       |
| DRD2  | NAPHAZOLINE                   | Approved            |                                                                                                                                 | 0.041508041       |
| DRD2  | CLOZAPINE                     | Approved            | Antipsychotic Agents                                                                                                            | 0.014977128       |
| DRD2  | LUMATEPERONE                  | Approved            | antipsychotic agent                                                                                                             | 0.059297201       |
| DRD2  | ARIPIPRAZOLE LAUROXIL         | Approved            | antipsychotic agent                                                                                                             | 0.043692674       |
| DRD2  | OLANZAPINE                    | Approved            | for treatment of bipolar disorder,antidepressant,antipsychotic agent                                                            | 0.010923169       |
| DRD2  | CARIPRAZINE HYDROCHLORIDE     | Approved            |                                                                                                                                 | 0.103770101       |
| DRD2  | THIOTHIXENE                   | Approved            |                                                                                                                                 | 0.069180068       |
| DRD2  | FLUSPIRILENE                  | Approved            | Antipsychotic Agents                                                                                                            | 0.037734582       |
| DRD2  | ERGOLOID MESYLATES, USP       | Approved            | Nootropic Agents; Vasodilator Agents                                                                                            | 0.015964631       |
| DRD2  | ZUCLOPENTHIXOL                | Approved            | Antipsychotic Agents                                                                                                            | 0.155655152       |
| DRD2  | ZIPRASIDONE                   | Approved            | antipsychotic agent                                                                                                             | 0.026779381       |
| DRD2  | DAPIPIRAZOLE                  | Approved            | ophthalmological agent                                                                                                          | 0.041508041       |
| DRD2  | METOCLOPRAMIDE HYDROCHLORIDE  | Approved            | antimigraine agent,antiemetic,for treatment of gastroesophageal reflux disease,motilant,for treatment of diabetic gastroparesis | 0.059297201       |
| DRD2  | INFIGRATINIB                  | Approved            |                                                                                                                                 | 0.007686674       |
| DRD2  | BROMOCRIPTINE MESYLATE        | Approved            |                                                                                                                                 | 0.0296486         |
| DRD2  | AMINEPTIN                     | Approved            |                                                                                                                                 | 0.069180068       |
| DRD2  | PALIPERIDONE                  | Approved            | antipsychotic agent                                                                                                             | 0.051885051       |
| DRD2  | MINAPRINE                     | Approved            | Antidepressive Agents                                                                                                           | 0.069180068       |
| DRD2  | METHAMPHETAMINE               | Approved            | neuroprotectant                                                                                                                 | 0.008647508       |
| DRD2  | ROTIGOTINE                    | Approved            | antiparkinson agent                                                                                                             | 0.062262061       |
| DRD2  | AXITINIB                      | Approved            | antineoplastic agent                                                                                                            | 0.009433646       |
| DRD2  | RISPERIDONE                   | Approved            | antipsychotic agent,Antipsychotic Agents                                                                                        | 0.01858569        |
| DRD2  | ROPINIROLE                    | Approved            | for treatment of restlegs legs syndrome,antiparkinson agent                                                                     | 0.172950169       |
| DRD2  | CLEBOPRIDE                    | Approved            |                                                                                                                                 | 0.069180068       |
| DRD2  | FLUPHENAZINE DECANOATE        | Approved            |                                                                                                                                 | 0.207540203       |
| DRD2  | LOXAPINE SUCCINATE            | Approved            |                                                                                                                                 | 0.034590034       |
| DRD2  | BROMOCRIPTINE                 | Approved            | antidiabetic                                                                                                                    | 0.020084536       |
| DRD2  | CHLORPROTHIXENE               | Approved            | Antipsychotic Agents                                                                                                            | 0.083016081       |
| DRD2  | CARIPRAZINE                   | Approved            | antipsychotic agent                                                                                                             | 0.083016081       |
| DRD2  | PERGOLIDE MESYLATE            | Approved            |                                                                                                                                 | 0.0296486         |
| DRD2  | ACETOPHENAZINE                | Approved            | Antipsychotic Agents                                                                                                            | 0.207540203       |
| DRD2  | LURASIDONE HYDROCHLORIDE      | Approved            | antipsychotic agent                                                                                                             | 0.103770101       |
| DRD2  | PRALSETINIB                   | Approved            |                                                                                                                                 | 0.0296486         |
| DRD2  | SERTINDOLE                    | Approved            | antipsychotic agent                                                                                                             | 0.0296486         |
| DRD2  | MESORIDAZINE                  | Approved            | Antipsychotic Agents                                                                                                            | 0.062262061       |
| DRD2  | TRIMIPRAMINE MALEATE          | Approved            |                                                                                                                                 | 0.025942525       |
| DRD2  | APOMORPHINE                   | Approved            | antiparkinson agent,for treatment of erectile dysfunction,for treatment of sexual dysfunction in women                          | 0.030746697       |
| DRD2  | THIETHYLPERAZINE MALEATE      | Approved            |                                                                                                                                 | 0.207540203       |
| DRD2  | PRAMIPEXOLE                   | Approved            | antiparkinson agent                                                                                                             | 0.124524122       |
| DRD2  | THIOTHIXENE HYDROCHLORIDE     | Approved            |                                                                                                                                 | 0.069180068       |
| DRD2  | PHENOXYBENZAMINE              | Approved            | Anticonvulsants; Hypnotics and Sedatives                                                                                        | 0.018867291       |
| DRD2  | TRIFLUOPERAZINE               | Approved            | Antiemetics; Antipsychotic Agents                                                                                               | 0.013836014       |
| DRD2  | FRUQUINTINIB                  | Approved            | antineoplastic agent                                                                                                            | 0.0296486         |
| DRD2  | PAZOPANIB                     | Approved            | antineoplastic agent                                                                                                            | 0.003578279       |
| DRD2  | PERPHENAZINE                  | Approved            | Antipsychotic Agents                                                                                                            | 0.031929262       |
| DRD2  | BUSPIRONE                     | Approved            | Anti-anxiety Agents                                                                                                             | 0.059297201       |
| DRD2  | CHLORPROMAZINE HYDROCHLORIDE  | Approved            |                                                                                                                                 | 0.012208247       |
| DRD2  | PROMAZINE HYDROCHLORIDE       | Approved            |                                                                                                                                 | 0.025942525       |
| DRD2  | VANDETANIB                    | Approved            | antineoplastic agent                                                                                                            | 0.003578279       |
| DRD2  | BENZQUINAMIDE HYDROCHLORIDE   | Approved            |                                                                                                                                 | 0.207540203       |
| DRD2  | MINAPRINE HYDROCHLORIDE       | Approved            |                                                                                                                                 | 0.023060023       |
| DRD2  | BENPERIDOL                    | Approved            |                                                                                                                                 | 0.051885051       |
| DRD2  | ERDAFTINIB                    | Approved            |                                                                                                                                 | 0.017295017       |
| DRD2  | THIETHYLPERAZINE              | Approved            | Antiemetics                                                                                                                     | 0.056601873       |
| DRD2  | METHOTRIMEPRAZINE             | Approved            | Antipsychotic Agents                                                                                                            | 0.0296486         |
| DRD2  | FLUPHENAZINE ENANTHATE        | Approved            |                                                                                                                                 | 0.207540203       |
| DRD2  | PIPERACETAZINE                | Approved            |                                                                                                                                 | 0.069180068       |
| DRD2  | LITHIUM                       | Approved            |                                                                                                                                 | 0.009882867       |
| DRD2  | TRIFLUOPERAZINE HYDROCHLORIDE | Approved            |                                                                                                                                 | 0.018867291       |
| DRD2  | OLANZAPINE PAMOATE            | Approved            |                                                                                                                                 | 0.041508041       |
| DRD2  | TOLAZOLINE                    | Approved            | Antihypertensive Agents                                                                                                         | 0.041508041       |
| DRD2  | MEPHENTERMINE                 | Approved            | Antihypertensive Agents; Vasoconstrictor Agents                                                                                 | 0.103770101       |
| DRD2  | THIETHYLPERAZINE MALATE       | Approved            |                                                                                                                                 | 0.025942525       |
| DRD2  | TIVOZANIB                     | Approved            | antineoplastic agent                                                                                                            | 0.023060023       |
| DRD2  | ASENAPINE MALEATE             | Approved            |                                                                                                                                 | 0.103770101       |
| DRD2  | PERGOLIDE                     | Approved            | Antiparkinson Agents                                                                                                            | 0.061041236       |
| DRD2  | PHENTOLAMINE                  | Approved            | Antihypertensive Agents,for treatment of erectile dysfunction                                                                   | 0.013836014       |

| gene  | drug                          | regulatory approval | indication                                                                                            | interaction score |
|-------|-------------------------------|---------------------|-------------------------------------------------------------------------------------------------------|-------------------|
| DRD2  | VERALIPRIDE                   | Approved            |                                                                                                       | 0.207540203       |
| DRD2  | ACETOPHENAZINE MALEATE        | Approved            |                                                                                                       | 0.207540203       |
| DRD2  | DIHYDROERGOTAMINE MESYLATE    | Approved            | antimigraine agent                                                                                    | 0.02075402        |
| DRD2  | CARPHENAZINE                  | Approved            | Antipsychotic Agents                                                                                  | 0.155655152       |
| DRD2  | SUMATRIPTAN                   | Approved            | antimigraine agent                                                                                    | 0.018046974       |
| DRD2  | EPHEDRINE                     | Approved            | Central Nervous System Stimulants                                                                     | 0.012208247       |
| DRD2  | DISULFIRAM                    | Approved            | Alcohol Deterrents                                                                                    | 0.009653033       |
| DRD2  | PAREGORIC                     | Approved            | analgesic                                                                                             | 0.009023487       |
| DRD2  | DEHYDRATED ALCOHOL            | Approved            |                                                                                                       | 0.005254182       |
| DRD2  | PRAMIPEXOLE DIHYDROCHLORIDE   | Approved            |                                                                                                       | 0.069180068       |
| DRD2  | REGORAFENIB                   | Approved            | antineoplastic agent                                                                                  | 0.006289097       |
| DRD2  | CABOZANTINIB S-MALATE         | Approved            | antineoplastic agent                                                                                  | 0.009433646       |
| DRD2  | PROPOFOL                      | Approved            | sedative                                                                                              | 0.01338969        |
| DRD2  | MESORIDAZINE BESYLATE         | Approved            |                                                                                                       | 0.103770101       |
| DRD2  | DEXTROAMPHETAMINE SULFATE     | Approved            | for treatment of ADHD,for treatment of cognitive dysfunction                                          | 0.021846337       |
| DRD2  | RAMUCIRUMAB                   | Approved            | antineoplastic agent                                                                                  | 0.034590034       |
| DRD2  | METARAMINOL                   | Approved            | Antihypertensive Agents; Vasoconstrictor Agents                                                       | 0.0296486         |
| DRD2  | SORAFENIB                     | Approved            | antineoplastic agent                                                                                  | 0.001820528       |
| DRD2  | SUNITINIB                     | Approved            | antineoplastic agent                                                                                  | 0.004235514       |
| DRD2  | PHENYLTOLOXAMINE              | Approved            |                                                                                                       | 0.103770101       |
| DRD2  | PSEUDOEPHEDRINE               | Approved            | antiallergy agent                                                                                     | 0.012208247       |
| DRD2  | TRIFLUPROMAZINE HYDROCHLORIDE | Approved            |                                                                                                       | 0.034590034       |
| DRD2  | AMOXAPINE                     | Approved            | antidepressant                                                                                        | 0.013836014       |
| DRD2  | DOMPERIDONE                   | Approved            | Antiemetics                                                                                           | 0.118594401       |
| DRD2  | REMOXIPRIDE HYDROCHLORIDE     | Approved            |                                                                                                       | 0.207540203       |
| DRD2  | ASENAPINE                     | Approved            | antipsychotic agent                                                                                   | 0.016603216       |
| DRD2  | PEXIDARTINIB                  | Approved            |                                                                                                       | 0.0148243         |
| DRD2  | METHYLDOPA ANHYDROUS          | Approved            | Antihypertensive Agents                                                                               | 0.006694845       |
| DRD2  | NINTEDANIB ESYLATE            | Approved            | antineoplastic agent                                                                                  | 0.008301608       |
| DRD2  | PHENYLEPHRINE                 | Approved            | for treatment of incontinence                                                                         | 0.012971263       |
| DRD2  | CHLORPROMAZINE                | Approved            |                                                                                                       | 0.072919531       |
| DRD2  | AMISULPRIDE                   | Approved            | antipsychotic agent,antiemetic                                                                        | 0.031929262       |
| DRD2  | QUETIAPINE FUMARATE           | Approved            | antidepressant,antipsychotic agent                                                                    | 0.034590034       |
| DRD2  | CARPHENAZINE MALEATE          | Approved            |                                                                                                       | 0.069180068       |
| DRD2  | MELEVODOPA                    | Approved            | antiparkinson agent                                                                                   | 0.0296486         |
| DRD2  | ROPINIROLE HYDROCHLORIDE      | Approved            |                                                                                                       | 0.051885051       |
| DRD2  | HALOPERIDOL LACTATE           | Approved            |                                                                                                       | 0.051885051       |
| DRD2  | LOXAPINE HYDROCHLORIDE        | Approved            |                                                                                                       | 0.041508041       |
| DRD2  | PROPIOMAZINE                  | Approved            | Hypnotics and Sedatives                                                                               | 0.0296486         |
| DRD2  | CAFFEINE                      | Approved            | Central Nervous System Stimulants                                                                     | 0.011218389       |
| DRD2  | NALTREXONE                    | Approved            | for treatment of substance abuse,appetite suppressant,analgesic                                       | 0.024416494       |
| DRD2  | RASAGILINE                    | Approved            | antiparkinson agent                                                                                   | 0.059297201       |
| CRHR1 | DOXEPIN HYDROCHLORIDE         | Approved            | hypnotic,antimigraine agent                                                                           | 0.066297565       |
| CRHR1 | DESPRAMINE                    | Approved            | Tricyclic,Antidepressive Agents                                                                       | 0.074797252       |
| CRHR1 | AMITRIPTYLINE HYDROCHLORIDE   | Approved            | analgesic                                                                                             | 0.064824285       |
| CRHR1 | TRIMIPRAMINE                  | Approved            | Tricyclic,Antidepressive Agents                                                                       | 0.088396753       |
| CRHR1 | CLOMIPRAMINE                  | Approved            | Tricyclic,Antidepressive Agents                                                                       | 0.076765601       |
| CRHR1 | TELAVANCIN                    | Approved            |                                                                                                       | 2.917092846       |
| CRHR1 | FLUOXETINE HYDROCHLORIDE      | Approved            | for treatment of bipolar disorder,for treatment of autism,antidepressant,for treatment of sleep apnea | 0.208363775       |
| CRHR1 | NORTRIPTYLINE                 | Approved            | antidepressant,antiasthmatic agent                                                                    | 0.091159151       |
| PDE4B | AMINOPHYLLINE                 | Approved            |                                                                                                       | 0.116683714       |
| PDE4B | FLAVOXATE HYDROCHLORIDE       | Approved            |                                                                                                       | 0.145854642       |
| PDE4B | RESVERATROL                   | Approved            | antineoplastic agent,antidiabetic,for treatment of herpes simplex virus 1                             | 0.023813003       |
| PDE4B | ROFLUMILAST                   | Approved            | for treatment of chronic obstructive pulmonary disorder (COPD)                                        | 0.388945713       |
| PDE4B | DYPHYLLINE                    | Approved            | Bronchodilator Agents; Vasodilator Agents                                                             | 0.500073059       |
| PDE4B | THEOPHYLLINE SODIUM GLYCINATE | Approved            |                                                                                                       | 0.116683714       |
| PDE4B | INAMRINONE                    | Approved            | Cardiotonic Agents; Phosphodiesterase Inhibitors                                                      | 0.122824962       |
| PDE4B | CRISABOROLE                   | Approved            | antipsoriatic,antiinflammatory agent                                                                  | 0.33338204        |
| PDE4B | THEOPHYLLINE                  | Approved            | bronchodilator                                                                                        | 0.129648571       |
| PDE4B | PAPAVERINE                    | Approved            | Antispasmodics; Anti-impotence Agents; Vasodilator Agents                                             | 0.155578285       |
| PDE4B | APREMILAST                    | Approved            | antipsoriatic,DMARD,antiinflammatory agent                                                            | 0.233367428       |
| PDE4B | RITODRINE                     | Approved            | Tocolytic Agents                                                                                      | 0.777891426       |
| PDE4B | CAFFEINE                      | Approved            | Central Nervous System Stimulants                                                                     | 0.063072278       |
| PDE4B | AMLEXANOX                     | Approved            |                                                                                                       | 0.089756703       |
| PDE4B | PENTOXIFYLLINE                | Approved            | for treatment of amyotrophic lateral sclerosis (ALS)                                                  | 0.100014612       |
| PDE4B | DEHYDRATED ALCOHOL            | Approved            |                                                                                                       | 0.029540181       |
| PDE4B | OXTRIPHYLLINE                 | Approved            |                                                                                                       | 0.116683714       |
| PDE4B | ASPIRIN                       | Approved            | NSAID,antithrombotic,anticoagulant                                                                    | 0.008275441       |
| APOC1 | MISOPROSTOL                   | Approved            | labor-inducing agent                                                                                  | 0.243091071       |
| APOC1 | ALPROSTADIL                   | Approved            | for treatment of sexual dysfunction in women,for treatment of erectile dysfunction                    | 0.084553416       |
| APOC1 | DINOPROSTONE                  | Approved            | Abortifacient Agents                                                                                  | 0.097236428       |
| APOC1 | RITONAVIR                     | Approved            |                                                                                                       | 0.144053968       |
| APOC1 | ILOPROST                      | Approved            | antihypertensive agent                                                                                | 0.162060714       |
| APOC1 | TREPROSTINIL                  | Approved            | Antihypertensive Agents; Antithrombotic Agents                                                        | 0.216080952       |
